# Supplementary material for: Regulating and controlling the stepwise ESDPT channel of BP(OH)2DCEt2 using the strategy of solvent polarity and external electric field
Source: Royal Society of Chemistry journal article supplement (doi:10.1039/d4cp00989d), 2024-01-01
Supplement: d4cp00989d1.pdf [file d4cp00989d1.pdf]

## Electronic Supplementary Information

Regulating and controlling the stepwise ESDPT channel of BP(OH)<sub>2</sub>DCEt<sub>2</sub> with the strategy of solvent polarity and the external electric field

Hongbin Zhuang, Wei Shi, Guijie Zhao, Yongqing Li\*

*School of Physics, Liaoning University, Shenyang 110036, P. R. China*

**\*Corresponding author:** email: [yqli@lnu.edu.cn](mailto:yqli@lnu.edu.cn) (YongQing Li).

### Contents:

|                                                   |     |
|---------------------------------------------------|-----|
| 1. Table S1. ....                                 | S1  |
| 2. Table S2. ....                                 | S1  |
| 3. Table S3. ....                                 | S1  |
| 4. Figure S1. ....                                | S2  |
| 5. Figure S2. ....                                | S3  |
| 6. Table S4. ....                                 | S3  |
| 7. Table S5. ....                                 | S4  |
| 8. Table S6. ....                                 | S4  |
| 9. Figure S3. ....                                | S5  |
| 10. Figure S4. ....                               | S5  |
| 11. Figure S5. ....                               | S6  |
| 12. Table S7. ....                                | S6  |
| 13. Figure S6. ....                               | S7  |
| 14. Figure S7. ....                               | S8  |
| 15. Figure S8. ....                               | S8  |
| 16. Table S8. ....                                | S9  |
| 17. Figure S9. ....                               | S9  |
| 18. Cartesian coordinates of all structures. .... | S10 |

Table S1. Obtained absorption, fluorescence peaks (including the enol and keto forms) and error ( $\Delta E$ ) between calculated values and experimental values of BP(OH)<sub>2</sub>DCEt<sub>2</sub> by using different functions and basis sets in cyclohexane (CYH).

|                            | Abs. (nm)         |            |                 | DPT-Flu. (nm)     |            |                 |
|----------------------------|-------------------|------------|-----------------|-------------------|------------|-----------------|
|                            | Exp. <sup>a</sup> | Cal.       | $\Delta E$ (eV) | Exp. <sup>a</sup> | Cal.       | $\Delta E$ (eV) |
| Cam-B3LYP/6-311g (d, p)    | 389               | 348        | 0.37            | 521               | 513        | 0.04            |
| wB97XD/6-311g (d, p)       | 389               | 346        | 0.39            | 521               | 512        | 0.04            |
| <b>B3LYP/6-311g (d, p)</b> | <b>389</b>        | <b>380</b> | <b>0.07</b>     | <b>521</b>        | <b>528</b> | <b>0.03</b>     |
| B3LYP/6-311+g(d, p)        | 389               | 381        | 0.06            | 521               | 529        | 0.04            |
| B3LYP/6-311++g(d, p)       | 389               | 381        | 0.06            | 521               | 529        | 0.04            |

Table S2. Obtained absorption, fluorescence peaks (including the enol and keto forms) and error ( $\Delta E$ ) between calculated values and experimental values of BP(OH)<sub>2</sub>DCEt<sub>2</sub> by using different functions and basis sets in dichloromethane (DCM).

|                            | Abs. (nm)         |            |                 | DPT-Flu. (nm)     |            |                 |
|----------------------------|-------------------|------------|-----------------|-------------------|------------|-----------------|
|                            | Exp. <sup>a</sup> | Cal.       | $\Delta E$ (eV) | Exp. <sup>a</sup> | Cal.       | $\Delta E$ (eV) |
| Cam-B3LYP/6-311g (d, p)    | 389               | 347        | 0.38            | 521               | 517        | 0.02            |
| wB97XD/6-311g (d, p)       | 389               | 345        | 0.4             | 521               | 516        | 0.02            |
| <b>B3LYP/6-311g (d, p)</b> | <b>388</b>        | <b>379</b> | <b>0.08</b>     | <b>521</b>        | <b>531</b> | <b>0.05</b>     |
| B3LYP/6-311+g(d, p)        | 389               | 380        | 0.07            | 521               | 531        | 0.05            |
| B3LYP/6-311++g(d, p)       | 389               | 380        | 0.07            | 521               | 531        | 0.05            |

Table S3. Obtained absorption, fluorescence peaks (including the enol and keto forms) and error ( $\Delta E$ ) between calculated values and experimental values of BP(OH)<sub>2</sub>DCEt<sub>2</sub> by using different functions and basis sets in acetonitrile (ACN).

|                         | Abs. (nm)         |      |                 | DPT-Flu. (nm)     |      |                 |
|-------------------------|-------------------|------|-----------------|-------------------|------|-----------------|
|                         | Exp. <sup>a</sup> | Cal. | $\Delta E$ (eV) | Exp. <sup>a</sup> | Cal. | $\Delta E$ (eV) |
| Cam-B3LYP/6-311g (d, p) | 385               | 346  | 0.36            | 521               | 513  | 0.04            |

|                            |            |            |             |            |            |             |
|----------------------------|------------|------------|-------------|------------|------------|-------------|
| wB97XD/6-311g (d, p)       | 385        | 343        | 0.39        | 521        | 512        | 0.04        |
| <b>B3LYP/6-311g (d, p)</b> | <b>385</b> | <b>377</b> | <b>0.07</b> | <b>521</b> | <b>527</b> | <b>0.03</b> |
| B3LYP/6-311+g(d, p)        | 385        | 378        | 0.06        | 521        | 528        | 0.03        |
| B3LYP/6-311++g(d, p)       | 385        | 378        | 0.06        | 521        | 528        | 0.03        |

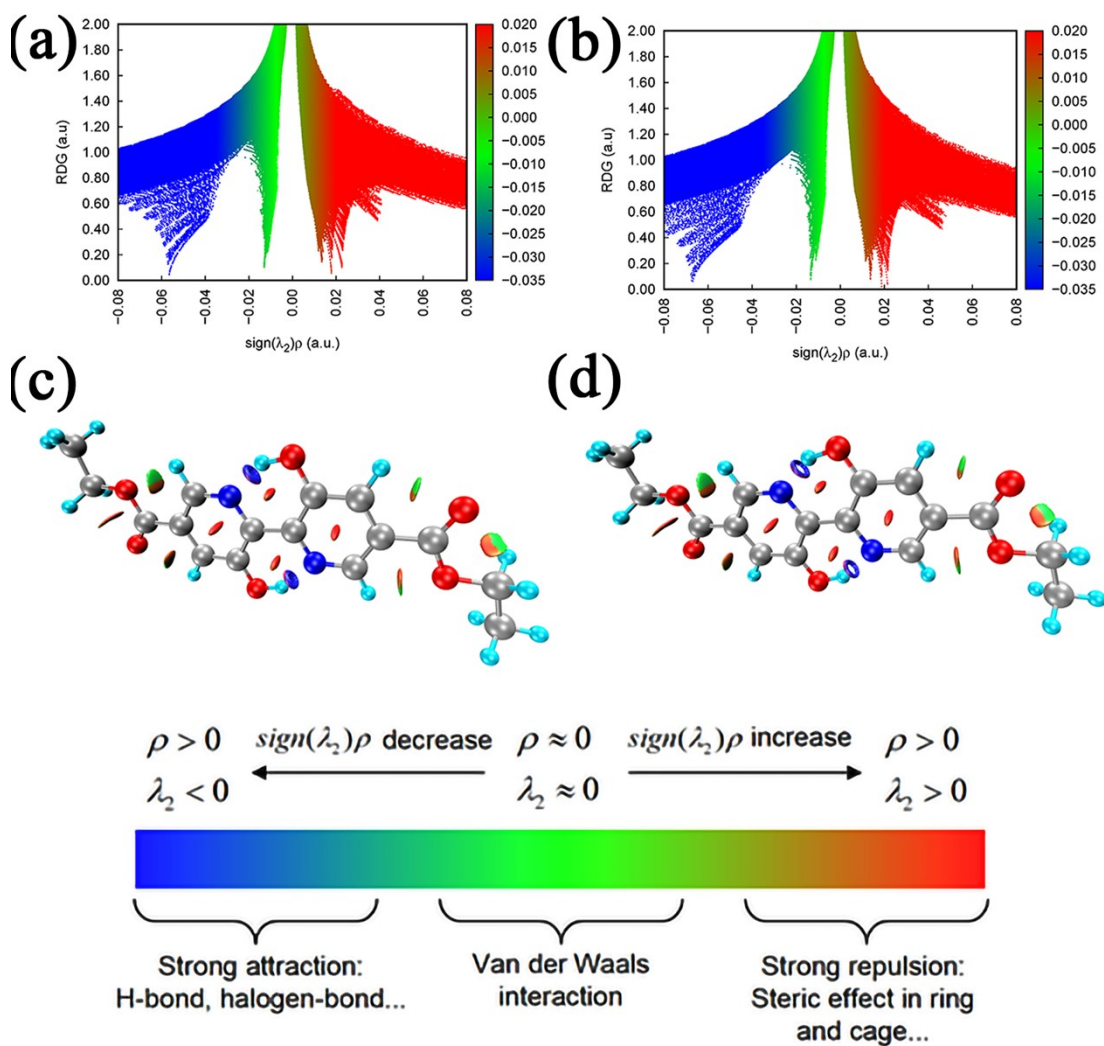

Figure S1. The scatter diagrams (top) of (a) S0 state and (b) S1 state, the RDG isosurfaces (bottom) of (c) S0 state and (d) S1 state in CYH solvent.

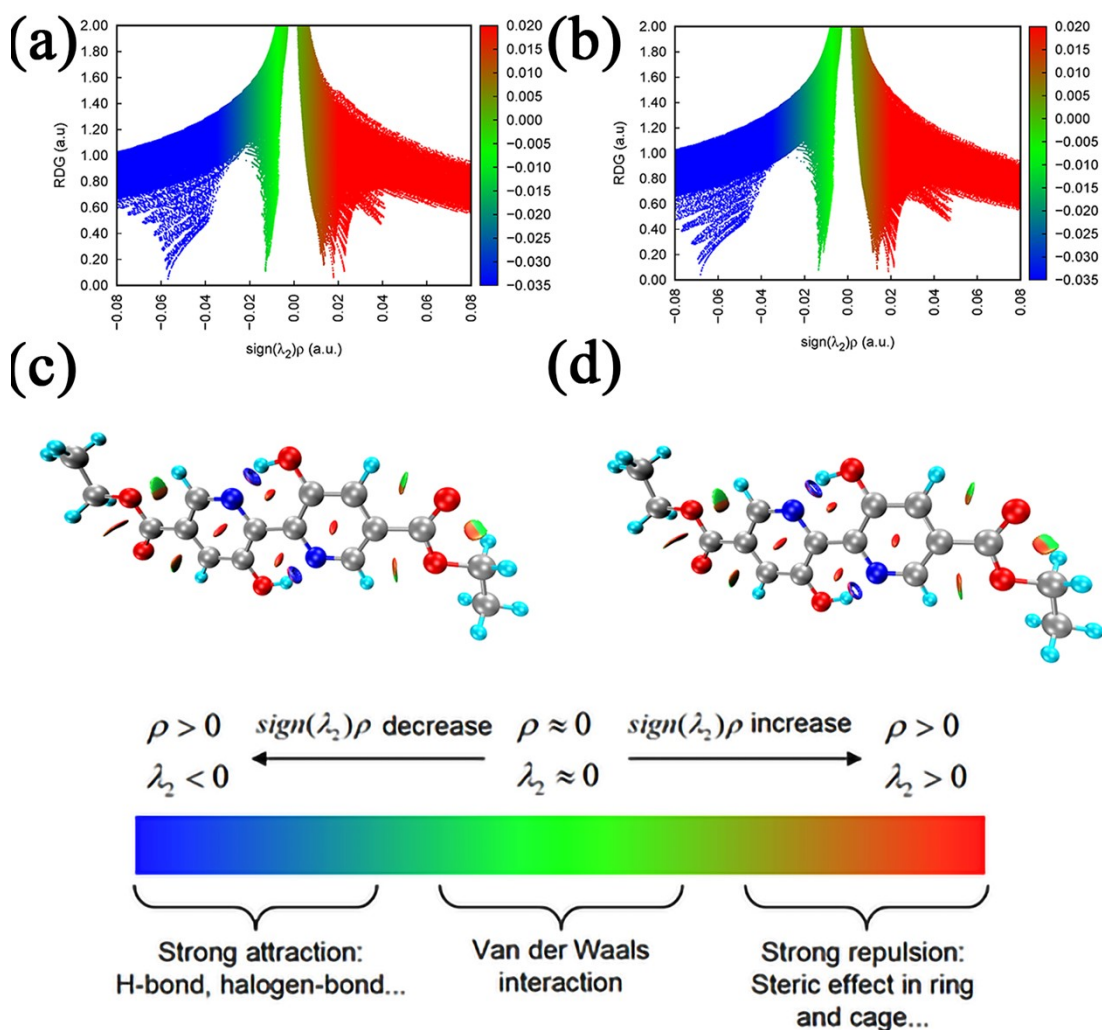

Figure S2. The scatter diagrams (top) of (a) S0 state and (b) S1 state, the RDG isosurfaces (bottom) of (c) S0 state and (d) S1 state in DCM solvent.

Table S4. Electronic excitation energy (nm), corresponding oscillator strengths (a.u.), and the transition percentage (%) for BP(OH)<sub>2</sub>DCEt<sub>2</sub> system in ACN, DCM and CYH solvents.

|     | Transition | $\lambda$ | f      | composition | CI(%)  |
|-----|------------|-----------|--------|-------------|--------|
| ACN | S0→S1      | 377       | 0.6526 | H→L         | 98.70% |
|     | S0→S2      | 316       | 0.0008 | H-2→L       | 97.60% |
|     | S0→S3      | 299       | 0.0000 | H-1→L       | 92.90% |
| DCM | S0→S1      | 379       | 0.6675 | H→L         | 98.80% |

|     |       |     |        |       |        |
|-----|-------|-----|--------|-------|--------|
|     | S0→S2 | 317 | 0.0008 | H-2→L | 97.60% |
|     | S0→S3 | 300 | 0.0000 | H-1→L | 93.10% |
|     | S0→S1 | 380 | 0.6572 | H→L   | 98.80% |
| CYH | S0→S2 | 318 | 0.0008 | H-2→L | 97.50% |
|     | S0→S3 | 300 | 0.0000 | H-1→L | 93.00% |

Table S5. Electronic emission energy (nm), corresponding oscillator strengths (a.u.), and the transition percentage (%) for DPT system in ACN, DCM and CYH solvents.

|     | Transition | $\lambda$ | f      | composition | CI(%)  |
|-----|------------|-----------|--------|-------------|--------|
|     | S0←S1      | 527       | 0.6040 | H←L         | 99.90% |
| ACN | S0←S2      | 429       | 0.0000 | H-1←L       | 99.30% |
|     | S0←S3      | 368       | 0.0000 | H-2←L       | 88.00% |
|     | S0←S1      | 531       | 0.6141 | H←L         | 99.90% |
| DCM | S0←S2      | 429       | 0.0000 | H-1←L       | 99.30% |
|     | S0←S3      | 368       | 0.0000 | H-2←L       | 88.50% |
|     | S0←S1      | 527       | 0.5939 | H←L         | 99.80% |
| CYH | S0←S2      | 436       | 0.0000 | H-1←L       | 99.30% |
|     | S0←S3      | 357       | 0.0000 | H-3←L       | 98.30% |

Table S6. Changes of dipole moment (D) for BP(OH)<sub>2</sub>DCEt<sub>2</sub> molecule in CYH, DCM and ACN solvents of different states.

|         | CYH     | DCM     | ACN     |
|---------|---------|---------|---------|
| N       | 0.00090 | 0.00052 | 0.00151 |
| N*      | 0.00028 | 0.00030 | 0.00059 |
| T1*/T2* | 3.71037 | 4.39922 | 4.59632 |
| T3*     | 0.00119 | 0.00136 | 0.00399 |

N represents enol form in S0 state;

T1 and T2 represent SPT form;

T3 represents DPT form;

The symbol "\*" represents the form in S1 state

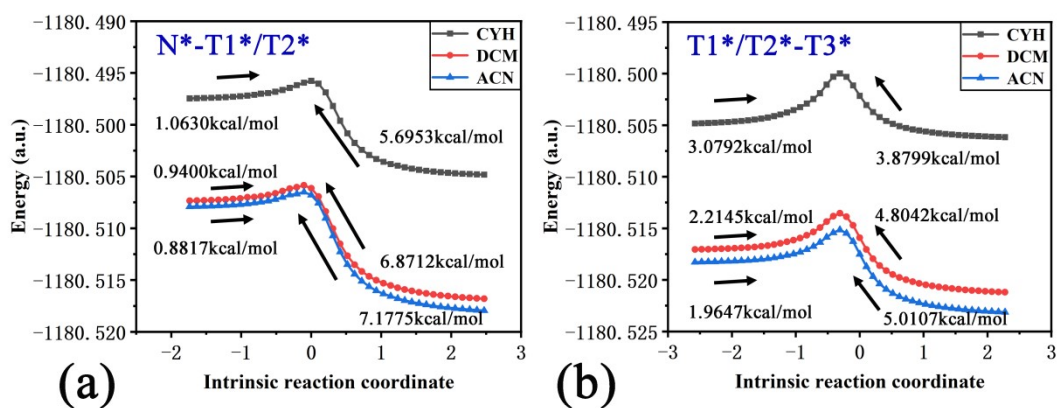

Figure S3. Comparison of S1 state Intrinsic reaction coordinates in different solvents. (a) The first step N\*- T1\* or N\*-T2\* in stepwise reaction path; (b)The second step T1\*-T3\* or T2\*-T3\* in stepwise reaction path.

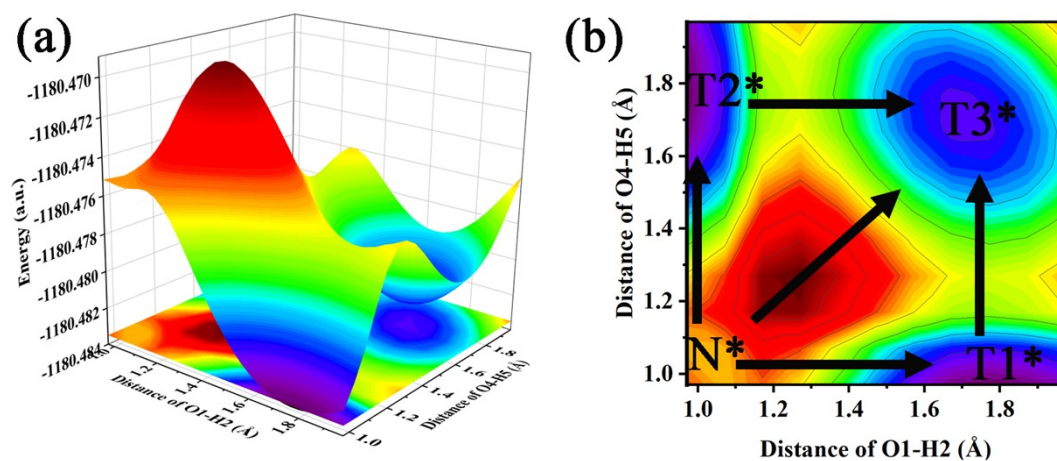

Figure S4. (a) S1 state PESs and (b) the S1 state projective plane for BP(OH)<sub>2</sub>DCEt<sub>2</sub> in the the gas phase.

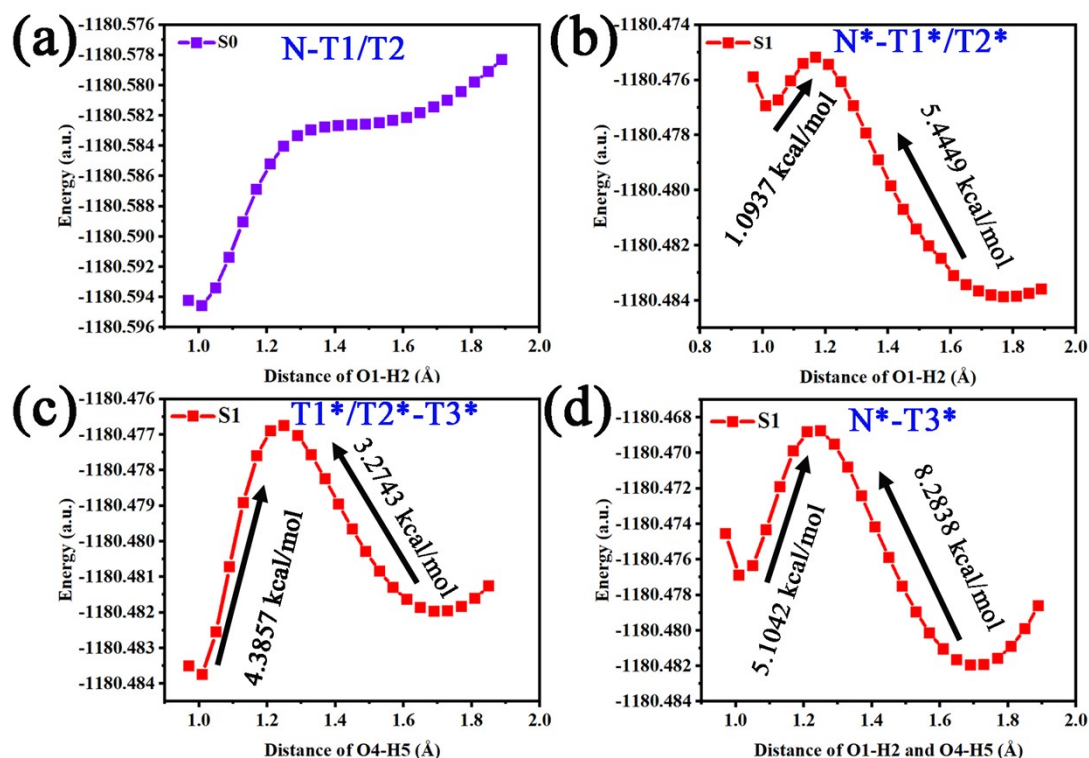

Figure S5. The potential energy curves of the gas phase. (a) The S0 state N-T1/T2 path; (b) The S1 state N\*-T1\*/T2\* path; (c) The S1-state T1\*/T2\*-T3\* path; (d) The S1-state N\*-T3\* path.

In Figure S4, the PESs of S1 state is symmetrical along with diagonal line. The PECs in S0 and S1 states in Figure S5 (a-d) indicate that the stepwise ESDPT process of BP(OH)<sub>2</sub>DCET<sub>2</sub> occurs in S1 state.

Table S7. The Bond distances (Å) and bond angles (°) of double hydrogen bonds (O1-H2···N3 and O4-H5···N6) of BP(OH)<sub>2</sub>DCET<sub>2</sub> under the application of the external electric field.

|                                         | $E_x=0$ |        | $E_x=10^{-4}$ |        | $E_x=5 \times 10^{-4}$ |        |
|-----------------------------------------|---------|--------|---------------|--------|------------------------|--------|
|                                         | S0      | S1     | S0            | S1     | S0                     | S1     |
| O1-H2                                   | 0.9972  | 1.0195 | 0.9970        | 1.0200 | 0.9965                 | 1.0217 |
| H2···N3                                 | 1.6967  | 1.6225 | 1.6976        | 1.6205 | 1.6998                 | 1.6141 |
| $\delta(\text{O1-H2} \cdots \text{N3})$ | 148.07  | 150.33 | 148.05        | 150.40 | 148.00                 | 150.60 |
| O4-H5                                   | 0.9972  | 1.0195 | 0.9974        | 1.0192 | 0.9980                 | 1.0176 |
| H5···N6                                 | 1.6967  | 1.6225 | 1.6961        | 1.6240 | 1.6940                 | 1.6305 |

|                                       |               |        |                       |        |                       |        |
|---------------------------------------|---------------|--------|-----------------------|--------|-----------------------|--------|
| $\delta(\text{O4-H5}\cdots\text{N6})$ | 148.07        | 150.33 | 148.08                | 150.28 | 148.12                | 150.10 |
|                                       | $E_x=10^{-3}$ |        | $E_x=2\times 10^{-3}$ |        | $E_x=3\times 10^{-3}$ |        |
|                                       | S0            | S1     | S0                    | S1     | S0                    | S1     |
| O1-H2                                 | 0.9957        | 1.0237 | 0.9943                | 1.0289 | 0.9930                | 1.0333 |
| H2 $\cdots$ N3                        | 1.7026        | 1.6066 | 1.7079                | 1.5895 | 1.7127                | 1.5755 |
| $\delta(\text{O1-H2}\cdots\text{N3})$ | 147.95        | 150.83 | 147.85                | 151.36 | 147.76                | 151.83 |
| O4-H5                                 | 0.9988        | 1.0155 | 1.0005                | 1.0104 | 1.0022                | 1.0049 |
| H5 $\cdots$ N6                        | 1.6910        | 1.6399 | 1.6850                | 1.6622 | 1.6783                | 1.6872 |
| $\delta(\text{O4-H5}\cdots\text{N6})$ | 148.18        | 149.82 | 148.30                | 149.20 | 148.45                | 148.54 |

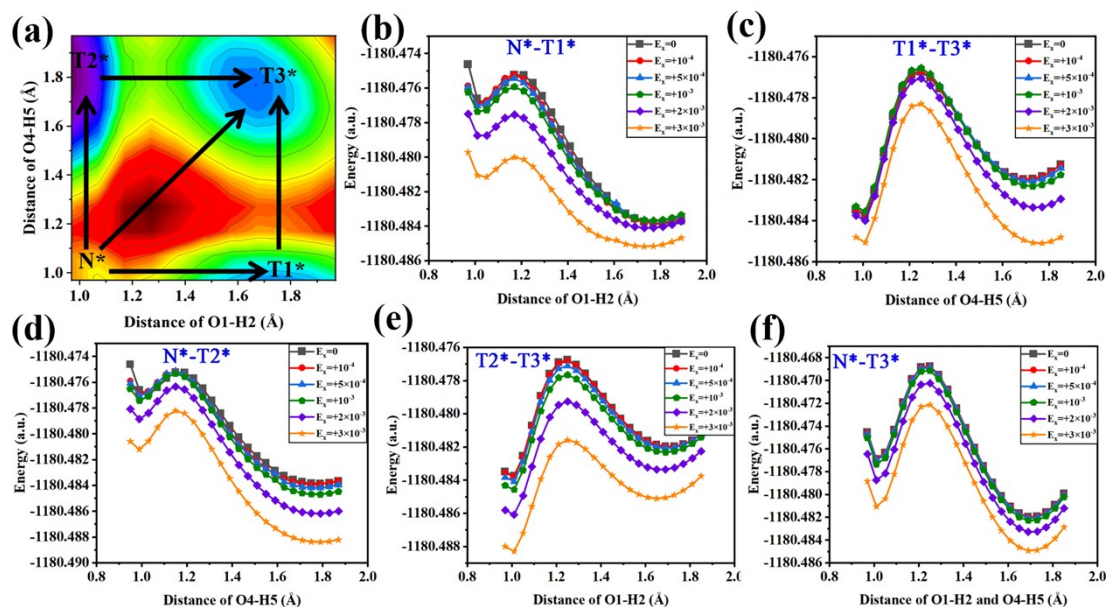

Figure S6. The potential energy curves of ESDPT path under the different external electric field. (a) The projective plane of the S1 state potential energy surface under  $E_x = +3\times 10^{-3}$  a.u.; (b) The S1 state N\*- T1\* path; (c) The S1 state T1\*-T3\* path; (d) The S1 state N\*-T2\* path; (e) The S1 state T2\*-T3\* path; (f) The S1 state N\*-T3\* path.



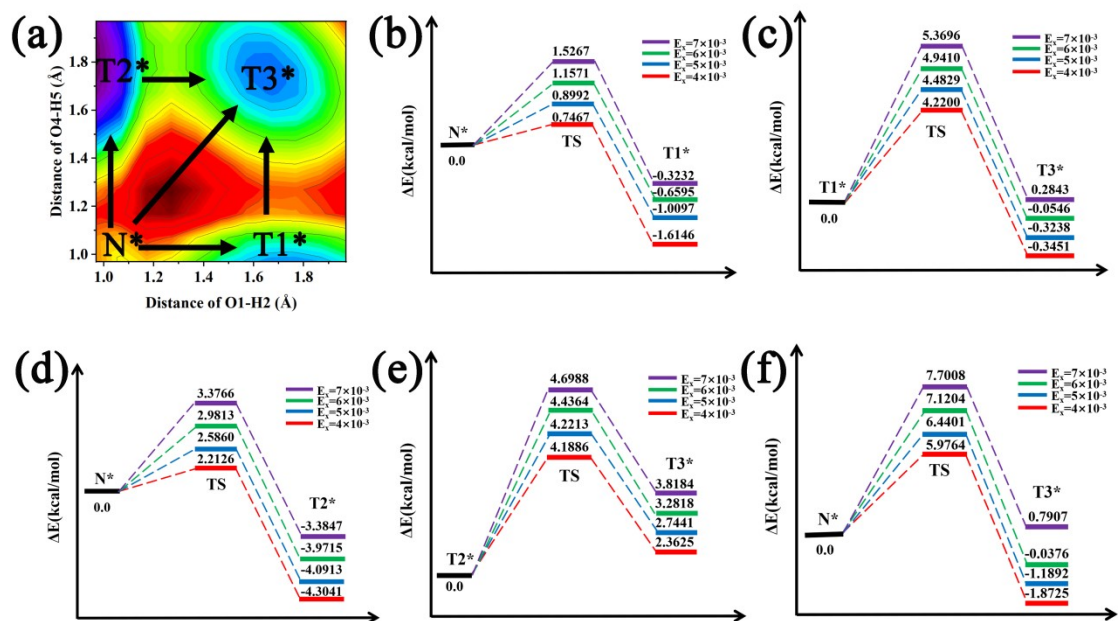

Figure S7. (a) The S1 state projective plane with  $E_x = +3 \times 10^{-3}$  a.u. Calculated energy barriers for (b) N\*-T1\* path, (c) T1\*-T3\* path, (d) N\*-T2\* path, (e) T2\*-T3\* path and (f) N\*-T3\* path from  $E_x = +4 \times 10^{-3}$  a.u. to  $E_x = +7 \times 10^{-3}$  a.u. TS stands for transition-state structure energy.

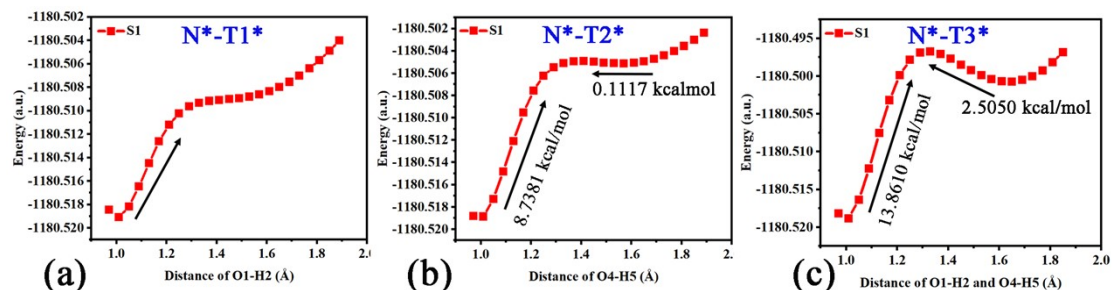

Figure S8. The potential energy curves with  $E_x = +8 \times 10^{-3}$  a.u. (a) The S1 state N\*-T1\* path; (b) The S1 state N\*-T2\* path; (c) The S1 state N\*-T3\* path.

As shown in Figure S7, the results indicate that the forward energy barriers increase with the increasing EEF. The ESDPT process is difficult to occur due to the excessively large strength of the EEF. It is worth noting in Figure S8 that there is no stable keto structure existing when the EEF is applied to  $E_x = +8 \times 10^{-3}$  a.u. Therefore, we only focus on the range of the EEF from  $+1 \times 10^{-4}$  a.u. to  $+3 \times 10^{-3}$  a.u. In addition, since the application of an external electric field less than  $E_x = 10^{-4}$  has no effect on the energy barriers of ESDPT, we do not present the data.

Table S8. The potential barriers (kcal/mol) of path: N\*-T1\*-T3\*, path: N\*-T2\*-T3\* and path: N\*-T3\* under  $E_x = 0$  a.u.,  $E_x = +3 \times 10^{-3}$  a.u.,  $E_y = +3 \times 10^{-3}$  a.u.,  $E_z = +3 \times 10^{-3}$  a.u. of S1 state potential energy curves.

|                       |         | $E_x=0$ | $E_x=3 \times 10^{-3}$ | $E_y=3 \times 10^{-3}$ | $E_z=3 \times 10^{-3}$ |
|-----------------------|---------|---------|------------------------|------------------------|------------------------|
| Forward<br>(kcal/mol) | N*-T1*  | 1.0937  | 0.7210                 | 0.9099                 | 1.0768                 |
|                       | T1*-T3* | 4.3856  | 4.2426                 | 4.9573                 | 4.9623                 |
|                       | N*-T2*  | 1.0937  | 1.8750                 | 1.3228                 | 1.0768                 |
|                       | T2*-T3* | 4.3856  | 4.2068                 | 4.1974                 | 4.9623                 |
|                       | N*-T3*  | 5.1042  | 5.6011                 | 5.1255                 | 5.0803                 |
| Reverse<br>(kcal/mol) | T1*-N*  | 5.4449  | 3.2461                 | 5.7436                 | 6.1829                 |
|                       | T3*-T1* | 3.2743  | 4.2696                 | 3.3333                 | 3.3133                 |
|                       | T2*-N*  | 5.4449  | 6.3868                 | 5.4775                 | 6.1829                 |
|                       | T3*-T2* | 3.2743  | 2.2075                 | 3.2423                 | 3.3133                 |
|                       | T3*-N*  | 8.2662  | 8.0327                 | 8.2706                 | 8.4312                 |

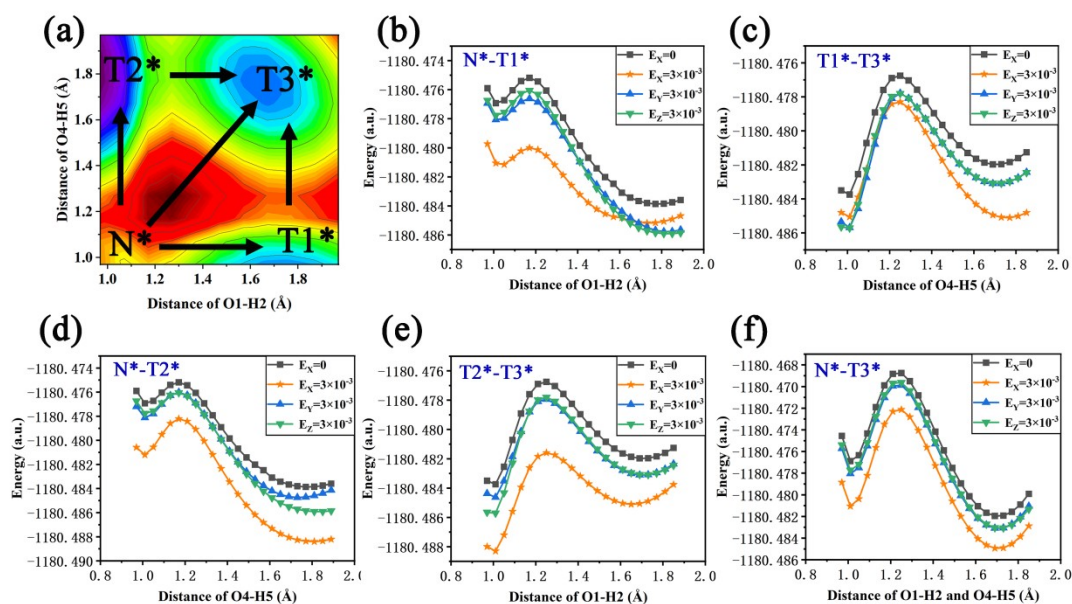

Figure S9. (a) The S1 state projective plane with  $E_x = +3 \times 10^{-3}$  a.u. Calculated energy barriers for (b) N\*-T1\* path, (c) T1\*-T3\* path, (d) N\*-T2\* path, (e) T2\*-T3\* path and (f) N\*-T3\* path under  $E_x = +3 \times 10^{-3}$  a.u.,  $E_y = +3 \times 10^{-3}$  a.u. and  $E_z = +3 \times 10^{-3}$  a.u.

### Cartesian coordinates of all structures

N represents the enol structure of BP(OH)<sub>2</sub>DCEt<sub>2</sub> in S<sub>0</sub> state, T1 and T2 represent the form of the single proton transfer (SPT) along hydrogen bonds O1-H2...N3 or O4-H5...N6, T3 represents the form of the double proton transfer (DPT). N\*, T1\*/T2\* and T3\* represent the structure in S<sub>1</sub> state. TS\* represents transition state structure in S<sub>1</sub> state.

### The geometric structure coordinates of N in cyclohexane.

|   |             |             |             |
|---|-------------|-------------|-------------|
| C | 0.71924400  | 0.15312400  | -0.00017200 |
| C | 2.88079900  | -0.71438300 | -0.00002700 |
| C | 3.44376900  | 0.56721000  | 0.00002400  |
| C | 2.59745900  | 1.66913800  | -0.00002100 |
| C | 1.21361000  | 1.48743000  | -0.00011400 |
| C | -0.71924400 | -0.15312800 | -0.00021500 |
| C | -1.21361100 | -1.48743300 | -0.00018200 |
| C | -2.59746100 | -1.66913900 | -0.00008100 |
| C | -3.44377000 | -0.56721100 | -0.00010600 |
| C | -2.88079800 | 0.71438200  | -0.00019600 |
| H | 3.50358900  | -1.59893000 | 0.00002300  |
| H | 3.00274700  | 2.67312500  | 0.00003700  |
| H | -3.00274900 | -2.67312700 | 0.00002600  |
| H | -3.50358800 | 1.59892900  | -0.00022700 |
| O | -0.42192500 | -2.56260600 | -0.00026200 |
| H | 0.51718200  | -2.22265100 | -0.00039000 |
| O | 0.42192100  | 2.56260200  | -0.00016900 |
| H | -0.51718500 | 2.22264400  | -0.00020000 |
| N | 1.56710100  | -0.89790500 | -0.00012600 |
| N | -1.56710000 | 0.89790300  | -0.00022900 |
| C | -4.91831200 | -0.79716300 | 0.00011700  |
| C | 4.91830900  | 0.79716600  | 0.00017800  |

|   |             |             |             |
|---|-------------|-------------|-------------|
| O | 5.43081000  | 1.89235800  | 0.00021700  |
| O | -5.43081800 | -1.89235400 | 0.00098600  |
| C | -7.05706900 | 0.24196200  | -0.00029600 |
| C | -7.61444600 | 1.64761300  | 0.00070700  |
| H | -7.36154900 | -0.32415900 | 0.88324400  |
| H | -7.36222000 | -0.32312900 | -0.88429400 |
| H | -7.28825400 | 2.19613800  | -0.88606200 |
| H | -8.70707700 | 1.61062900  | 0.00061400  |
| H | -7.28834200 | 2.19490600  | 0.88827500  |
| C | 7.05707100  | -0.24195900 | 0.00030300  |
| C | 7.61445700  | -1.64760900 | -0.00009400 |
| H | 7.36174400  | 0.32330400  | 0.88434000  |
| H | 7.36202900  | 0.32399200  | -0.88319800 |
| H | 7.28807600  | -2.19530600 | -0.88730200 |
| H | 8.70708800  | -1.61061900 | -0.00037800 |
| H | 7.28854400  | -2.19572800 | 0.88703500  |
| O | 5.60800400  | -0.35466700 | 0.00022100  |
| O | -5.60800400 | 0.35466900  | -0.00074400 |

The geometric structure coordinates of N\* in cyclohexane.

|   |             |             |             |
|---|-------------|-------------|-------------|
| C | -0.69568400 | -0.14305800 | -0.00007200 |
| C | -2.87308700 | 0.70378000  | -0.00031900 |
| C | -3.45011200 | -0.59061800 | -0.00018600 |
| C | -2.59452200 | -1.69964100 | 0.00004800  |
| C | -1.21433500 | -1.50116700 | 0.00012200  |
| C | 0.69570500  | 0.14287100  | -0.00005900 |
| C | 1.21427200  | 1.50100400  | -0.00019300 |
| C | 2.59444400  | 1.69957000  | -0.00011400 |
| C | 3.45010500  | 0.59060000  | 0.00005200  |
| C | 2.87316000  | -0.70383400 | 0.00012900  |

|   |             |             |             |
|---|-------------|-------------|-------------|
| H | -3.51063900 | 1.57902500  | -0.00048800 |
| H | -2.99227300 | -2.70586200 | 0.00018200  |
| H | 2.99213000  | 2.70581700  | -0.00019800 |
| H | 3.51076700  | -1.57903900 | 0.00025200  |
| O | 0.39904700  | 2.54140100  | -0.00041100 |
| H | -0.55207600 | 2.16945000  | -0.00053600 |
| O | -0.39920000 | -2.54163200 | 0.00039700  |
| H | 0.55195900  | -2.16975700 | 0.00052200  |
| N | -1.57091300 | 0.91566800  | -0.00026800 |
| N | 1.57099900  | -0.91580300 | 0.00008600  |
| C | 4.90787400  | 0.80403300  | 0.00013700  |
| C | -4.90789500 | -0.80395900 | -0.00026600 |
| O | -5.43741800 | -1.89757900 | 0.00012100  |
| O | 5.43732800  | 1.89768500  | -0.00001900 |
| C | 7.04195100  | -0.24962600 | 0.00008100  |
| C | 7.59995800  | -1.65573800 | 0.00032300  |
| H | 7.35155500  | 0.31577500  | 0.88305300  |
| H | 7.35155800  | 0.31545600  | -0.88309800 |
| H | 7.27311200  | -2.20389300 | -0.88663000 |
| H | 8.69274300  | -1.62033800 | 0.00030000  |
| H | 7.27313700  | -2.20358300 | 0.88747700  |
| C | -7.04190700 | 0.24983200  | 0.00010200  |
| C | -7.59982700 | 1.65597900  | 0.00012700  |
| H | -7.35139000 | -0.31534200 | 0.88326400  |
| H | -7.35170400 | -0.31543800 | -0.88288800 |
| H | -7.27311700 | 2.20391200  | -0.88701300 |
| H | -8.69261400 | 1.62064600  | 0.00032300  |
| H | -7.27280200 | 2.20400600  | 0.88709400  |
| O | -5.59735800 | 0.36055200  | -0.00016100 |
| O | 5.59740900  | -0.36043500 | 0.00009600  |

The geometric structure coordinates of T1\*/T2\* in cyclohexane.

|   |             |             |             |
|---|-------------|-------------|-------------|
| C | 0.68771400  | 0.15262400  | -0.00000800 |
| C | 2.92661100  | -0.71225700 | -0.00009400 |
| C | 3.46616600  | 0.57273200  | 0.00002900  |
| C | 2.58982900  | 1.67618000  | 0.00013800  |
| C | 1.20648400  | 1.47994100  | 0.00011900  |
| C | -0.72920900 | -0.16853800 | -0.00003600 |
| C | -1.22164900 | -1.55633500 | -0.00018200 |
| C | -2.63016300 | -1.71503800 | -0.00019200 |
| C | -3.47683200 | -0.59890900 | -0.00006300 |
| C | -2.90308500 | 0.67678600  | 0.00007700  |
| H | 3.53639800  | -1.60354800 | -0.00017500 |
| H | 2.98392800  | 2.68342900  | 0.00023300  |
| H | -3.03895600 | -2.71719800 | -0.00030300 |
| H | -3.52049700 | 1.56491000  | 0.00017500  |
| O | -0.41281100 | -2.53808400 | -0.00030300 |
| H | 1.15250700  | -1.81547000 | -0.00019700 |
| O | 0.40317600  | 2.53753200  | 0.00021100  |
| H | -0.53922400 | 2.18357700  | 0.00016400  |
| N | 1.60795900  | -0.87922100 | -0.00010500 |
| N | -1.57180800 | 0.87556800  | 0.00009000  |
| C | -4.94453300 | -0.80090900 | -0.00007700 |
| C | 4.92624100  | 0.80173900  | 0.00004600  |
| O | 5.43802700  | 1.90123100  | 0.00019700  |
| O | -5.47997900 | -1.88844900 | -0.00019300 |
| C | -7.07064700 | 0.26715200  | 0.00009100  |
| C | -7.61599300 | 1.67817600  | 0.00025800  |
| H | -7.38441400 | -0.29520200 | 0.88328500  |
| H | -7.38444200 | -0.29500200 | -0.88322100 |

|   |             |             |             |
|---|-------------|-------------|-------------|
| H | -7.28431100 | 2.22332800  | -0.88672400 |
| H | -8.70905200 | 1.65237600  | 0.00027300  |
| H | -7.28428200 | 2.22313000  | 0.88735200  |
| C | 7.07048000  | -0.23244300 | -0.00000900 |
| C | 7.63826100  | -1.63429600 | -0.00009700 |
| H | 7.37393900  | 0.33479500  | 0.88355000  |
| H | 7.37397800  | 0.33492300  | -0.88347200 |
| H | 7.31627500  | -2.18459700 | -0.88746100 |
| H | 8.73063400  | -1.59021600 | -0.00007200 |
| H | 7.31624000  | -2.18472100 | 0.88717700  |
| O | 5.62454900  | -0.35425600 | -0.00005000 |
| O | -5.62418900 | 0.36595400  | 0.00007900  |

The geometric structure coordinates of T3\* in cyclohexane.

|   |             |             |             |
|---|-------------|-------------|-------------|
| C | 0.68461200  | 0.16878900  | 0.00004900  |
| C | 2.92953800  | -0.69123900 | 0.00003900  |
| C | 3.47185500  | 0.59575800  | 0.00015000  |
| C | 2.61230400  | 1.70006700  | 0.00021200  |
| C | 1.19672700  | 1.54728000  | 0.00016600  |
| C | -0.68458500 | -0.16907100 | -0.00001300 |
| C | -1.19682500 | -1.54752400 | -0.00010800 |
| C | -2.61242100 | -1.70016900 | -0.00014700 |
| C | -3.47186900 | -0.59578200 | -0.00010300 |
| C | -2.92943400 | 0.69116600  | -0.00001900 |
| H | 3.53677000  | -1.58391200 | -0.00000700 |
| H | 3.01641800  | 2.70388200  | 0.00030200  |
| H | -3.01663200 | -2.70394500 | -0.00021400 |
| H | -3.53658200 | 1.58389500  | 0.00000600  |
| O | -0.40292100 | -2.53224000 | -0.00015400 |
| H | 1.15817400  | -1.80049800 | -0.00008700 |

|   |             |             |             |
|---|-------------|-------------|-------------|
| O | 0.40270100  | 2.53190200  | 0.00023600  |
| H | -1.15794700 | 1.80025500  | 0.00008400  |
| N | 1.60434200  | -0.86123900 | -0.00000400 |
| N | -1.60422300 | 0.86103800  | 0.00001700  |
| C | -4.93877400 | -0.80775200 | -0.00014600 |
| C | 4.93873900  | 0.80786100  | 0.00020700  |
| O | 5.46582100  | 1.89824900  | 0.00021300  |
| O | -5.46595600 | -1.89809000 | -0.00016900 |
| C | -7.07009400 | 0.25326800  | -0.00001700 |
| C | -7.61974100 | 1.66238600  | 0.00015500  |
| H | -7.38079800 | -0.31019500 | 0.88339800  |
| H | -7.38085300 | -0.30999800 | -0.88354000 |
| H | -7.29054100 | 2.20864000  | -0.88707700 |
| H | -8.71262900 | 1.63256200  | 0.00018600  |
| H | -7.29048600 | 2.20844500  | 0.88748800  |
| C | 7.07015200  | -0.25297400 | -0.00008200 |
| C | 7.61992000  | -1.66204400 | -0.00033300 |
| H | 7.38088900  | 0.31028100  | 0.88345500  |
| H | 7.38078000  | 0.31055300  | -0.88348400 |
| H | 7.29068900  | -2.20809300 | -0.88768000 |
| H | 8.71280600  | -1.63212400 | -0.00039200 |
| H | 7.29079300  | -2.20836600 | 0.88688500  |
| O | 5.62282800  | -0.35642300 | -0.00000500 |
| O | -5.62276200 | 0.35659100  | -0.00005400 |

The geometric structure coordinates of TS\* of N\*-T1\*/T2\* path in cyclohexane.

|   |             |             |             |
|---|-------------|-------------|-------------|
| C | -0.68335592 | 0.22215766  | 0.00000731  |
| C | -2.85192892 | -0.69488434 | -0.00015769 |
| C | -3.44440392 | 0.58633466  | 0.00006131  |
| C | -2.60712692 | 1.71677766  | 0.00025731  |



|   |             |             |             |
|---|-------------|-------------|-------------|
| C | -1.22375692 | 1.55319766  | 0.00023031  |
| C | 0.70994708  | -0.07023634 | -0.00002169 |
| C | 1.18264308  | -1.45659434 | -0.00023369 |
| C | 2.56532208  | -1.68531134 | -0.00025969 |
| C | 3.44162008  | -0.59344534 | -0.00007269 |
| C | 2.89769908  | 0.71127966  | 0.00013231  |
| H | -3.46085892 | -1.58906634 | -0.00030969 |
| H | -3.03133692 | 2.71207666  | 0.00042431  |
| H | 2.94133308  | -2.69990534 | -0.00041569 |
| H | 3.55610608  | 1.57060066  | 0.00027931  |
| O | 0.31729508  | -2.42930634 | -0.00038769 |
| H | -0.72715292 | -1.90458934 | -0.00032969 |
| O | -0.42834092 | 2.61718266  | 0.00041231  |
| H | 0.51804908  | 2.28037766  | 0.00036031  |
| N | -1.54355992 | -0.85704934 | -0.00017969 |
| N | 1.59180908  | 0.96320166  | 0.00015431  |
| C | 4.89791408  | -0.83696934 | -0.00009069 |
| C | -4.90524292 | 0.77271566  | 0.00009231  |
| O | -5.45519992 | 1.85629966  | 0.00031631  |
| O | 5.40231908  | -1.94115134 | -0.00028769 |
| C | 7.05379708  | 0.17080666  | 0.00015431  |
| C | 7.64060008  | 1.56503066  | 0.00038831  |
| H | 7.35097508  | -0.40048334 | -0.88314669 |
| H | 7.35093108  | -0.40076034 | 0.88329231  |
| H | 7.32546908  | 2.11957966  | 0.88756331  |
| H | 8.73235908  | 1.50666866  | 0.00041431  |
| H | 7.32552708  | 2.11985166  | -0.88663769 |
| C | -7.01976692 | -0.32036834 | -0.00013669 |
| C | -7.55211892 | -1.73645234 | -0.00037669 |
| H | -7.33992992 | 0.23909866  | -0.88309769 |

|   |             |             |             |
|---|-------------|-------------|-------------|
| H | -7.33992092 | 0.23879666  | 0.88301931  |
| H | -7.21541192 | -2.27860634 | 0.88660231  |
| H | -8.64538392 | -1.72097834 | -0.00037269 |
| H | -7.21541292 | -2.27830834 | -0.88753769 |
| O | -5.57358992 | -0.40483034 | -0.00015969 |
| O | 5.61097308  | 0.31146666  | 0.00014131  |

The geometric structure coordinates of TS\* of T1\*/T2\*-T3\* path in cyclohexane.

|   |             |             |             |
|---|-------------|-------------|-------------|
| C | -0.69178829 | -0.06145966 | 0.00001432  |
| C | -2.95180529 | 0.72917834  | -0.00006768 |
| C | -3.44593329 | -0.57728566 | 0.00007432  |
| C | -2.54626029 | -1.65631566 | 0.00018832  |
| C | -1.15660029 | -1.43155666 | 0.00016032  |
| C | 0.69301871  | 0.25866734  | -0.00002268 |
| C | 1.22573671  | 1.62572334  | -0.00017668 |
| C | 2.64139771  | 1.74123134  | -0.00019668 |
| C | 3.45969671  | 0.60240934  | -0.00007368 |
| C | 2.86420871  | -0.66630366 | 0.00007032  |
| H | -3.59368029 | 1.59726634  | -0.00015868 |
| H | -2.91646829 | -2.67281166 | 0.00029732  |
| H | 3.08101971  | 2.73015034  | -0.00030768 |
| H | 3.45387771  | -1.57213766 | 0.00016732  |
| O | 0.43635571  | 2.61766434  | -0.00028368 |
| H | -1.22291729 | 1.89250534  | -0.00019168 |
| O | -0.29561429 | -2.40083166 | 0.00025732  |
| H | 0.78851571  | -1.83062066 | 0.00019832  |
| N | -1.63710729 | 0.94515734  | -0.00009068 |
| N | 1.53477071  | -0.81328166 | 0.00009032  |
| C | 4.93100771  | 0.76582734  | -0.00009968 |
| C | -4.90254629 | -0.84558466 | 0.00010132  |

|   |             |             |             |
|---|-------------|-------------|-------------|
| O | -5.38504029 | -1.95705266 | 0.00023332  |
| O | 5.49513671  | 1.83886434  | -0.00025168 |
| C | 7.02862771  | -0.35849866 | 0.00004532  |
| C | 7.53769571  | -1.78298166 | 0.00021332  |
| H | 7.35677971  | 0.19561234  | 0.88321932  |
| H | 7.35676371  | 0.19539834  | -0.88326968 |
| H | 7.19251571  | -2.31959966 | -0.88683868 |
| H | 8.63106471  | -1.78475566 | 0.00020632  |
| H | 7.19252671  | -2.31938866 | 0.88739632  |
| C | -7.07414529 | 0.12918834  | -0.00003568 |
| C | -7.68083629 | 1.51457334  | -0.00017968 |
| H | -7.36145729 | -0.44627166 | 0.88356032  |
| H | -7.36144229 | -0.44644866 | -0.88352168 |
| H | -7.37474329 | 2.07373334  | -0.88759668 |
| H | -8.77148929 | 1.43953134  | -0.00018568 |
| H | -7.37476529 | 2.07390734  | 0.88713632  |
| O | -5.63167529 | 0.29064034  | -0.00003968 |
| O | 5.58005471  | -0.41961566 | 0.00006632  |

The geometric structure coordinates of N in dichloromethane.

|   |             |             |             |
|---|-------------|-------------|-------------|
| C | 0.71916700  | 0.15295000  | 0.00013300  |
| C | 2.88143100  | -0.71509700 | 0.00036400  |
| C | 3.44380100  | 0.56686800  | 0.00030000  |
| C | 2.59692100  | 1.66870700  | 0.00014600  |
| C | 1.21383900  | 1.48599800  | 0.00007300  |
| C | -0.71916100 | -0.15300100 | 0.00001300  |
| C | -1.21385500 | -1.48604300 | 0.00007600  |
| C | -2.59694100 | -1.66872600 | 0.00000500  |
| C | -3.44380200 | -0.56687300 | -0.00016500 |
| C | -2.88141100 | 0.71508200  | -0.00025300 |

|   |             |             |             |
|---|-------------|-------------|-------------|
| H | 3.50216600  | -1.60128900 | 0.00049000  |
| H | 3.00045300  | 2.67360100  | 0.00010000  |
| H | -3.00049100 | -2.67361300 | 0.00008200  |
| H | -3.50213100 | 1.60128600  | -0.00038100 |
| O | -0.41988400 | -2.56303100 | 0.00013500  |
| H | 0.51995900  | -2.22146800 | 0.00004400  |
| O | 0.41984300  | 2.56296900  | -0.00008000 |
| H | -0.51999200 | 2.22138700  | 0.00001900  |
| N | 1.56707500  | -0.89812400 | 0.00028700  |
| N | -1.56705200 | 0.89808600  | -0.00016700 |
| C | -4.91854700 | -0.79662400 | -0.00014900 |
| C | 4.91854200  | 0.79664400  | 0.00043500  |
| O | 5.42814900  | 1.89587700  | -0.00004700 |
| O | -5.42817200 | -1.89584800 | 0.00043700  |
| C | -7.06153600 | 0.24251400  | -0.00034900 |
| C | -7.61268000 | 1.65001800  | 0.00041700  |
| H | -7.36617400 | -0.31987500 | 0.88520800  |
| H | -7.36667400 | -0.31908200 | -0.88625100 |
| H | -7.28575500 | 2.19659600  | -0.88763900 |
| H | -8.70536500 | 1.61322100  | 0.00042900  |
| H | -7.28569000 | 2.19567800  | 0.88901300  |
| C | 7.06154700  | -0.24245800 | -0.00030500 |
| C | 7.61271300  | -1.64995200 | -0.00056400 |
| H | 7.36670000  | 0.31948800  | 0.88536500  |
| H | 7.36615000  | 0.31959300  | -0.88609400 |
| H | 7.28529100  | -2.19607400 | -0.88871800 |
| H | 8.70539700  | -1.61313000 | -0.00115100 |
| H | 7.28624200  | -2.19608100 | 0.88793500  |
| O | 5.60859900  | -0.35018700 | 0.00022000  |
| O | -5.60858600 | 0.35021900  | -0.00070900 |

The geometric structure coordinates of N\* in dichloromethane.

|   |             |             |             |
|---|-------------|-------------|-------------|
| C | 0.69252600  | -0.14199400 | 0.00006200  |
| C | 2.87114000  | 0.70498400  | 0.00017000  |
| C | 3.44783800  | -0.59188600 | 0.00001900  |
| C | 2.59183100  | -1.70104300 | -0.00006300 |
| C | 1.21233000  | -1.50236400 | -0.00001400 |
| C | -0.69254500 | 0.14182800  | 0.00002400  |
| C | -1.21227400 | 1.50221900  | 0.00008500  |
| C | -2.59176200 | 1.70098000  | 0.00011700  |
| C | -3.44783100 | 0.59187000  | 0.00003600  |
| C | -2.87120500 | -0.70503100 | -0.00008200 |
| H | 3.50790200  | 1.58103900  | 0.00025200  |
| H | 2.98636500  | -2.70889500 | -0.00013500 |
| H | -2.98623800 | 2.70885500  | 0.00017100  |
| H | -3.50801500 | -1.58105200 | -0.00015100 |
| O | -0.39583200 | 2.54144900  | 0.00004700  |
| H | 0.55667700  | 2.16828800  | -0.00021900 |
| O | 0.39596700  | -2.54165200 | 0.00002400  |
| H | -0.55657300 | -2.16855500 | 0.00027100  |
| N | 1.57094900  | 0.91783700  | 0.00018400  |
| N | -1.57102500 | -0.91795600 | -0.00008100 |
| C | -4.90475600 | 0.80377300  | 0.00003800  |
| C | 4.90477500  | -0.80370800 | -0.00002900 |
| O | 5.43383500  | -1.90086200 | -0.00014000 |
| O | -5.43375500 | 1.90095700  | 0.00007800  |
| C | -7.04326100 | -0.25013800 | -0.00015900 |
| C | -7.59520600 | -1.65814100 | -0.00041200 |
| H | -7.35356200 | 0.31157400  | -0.88498800 |
| H | -7.35368900 | 0.31130200  | 0.88479900  |

|   |             |             |             |
|---|-------------|-------------|-------------|
| H | -7.26748400 | -2.20454800 | 0.88762200  |
| H | -8.68803000 | -1.62316900 | -0.00047500 |
| H | -7.26737000 | -2.20427300 | -0.88857300 |
| C | 7.04322200  | 0.25032100  | 0.00004500  |
| C | 7.59509100  | 1.65835400  | 0.00016700  |
| H | 7.35360500  | -0.31115700 | -0.88490400 |
| H | 7.35363100  | -0.31131900 | 0.88488200  |
| H | 7.26729500  | 2.20452400  | 0.88831900  |
| H | 8.68791600  | 1.62344300  | 0.00014700  |
| H | 7.26726800  | 2.20468700  | -0.88787600 |
| O | 5.59539000  | 0.35609200  | 0.00007600  |
| O | -5.59543400 | -0.35598900 | -0.00007000 |

The geometric structure coordinates of T1\*/T2\* in dichloromethane.

|   |             |             |             |
|---|-------------|-------------|-------------|
| C | 0.68191700  | 0.12533600  | -0.00004800 |
| C | 2.93366500  | -0.72104300 | -0.00015300 |
| C | 3.46525100  | 0.56766000  | -0.00006400 |
| C | 2.58053500  | 1.66477200  | 0.00003200  |
| C | 1.20082900  | 1.46014000  | 0.00003700  |
| C | -0.72069800 | -0.18894200 | -0.00001700 |
| C | -1.22875800 | -1.57736500 | -0.00006900 |
| C | -2.64254100 | -1.72544900 | -0.00004100 |
| C | -3.48009700 | -0.60640500 | 0.00004100  |
| C | -2.89281800 | 0.67078800  | 0.00009800  |
| H | 3.54506200  | -1.61153600 | -0.00023200 |
| H | 2.96471700  | 2.67624400  | 0.00009500  |
| H | -3.05393200 | -2.72704500 | -0.00007500 |
| H | -3.50644900 | 1.56219500  | 0.00017200  |
| O | -0.43454600 | -2.56427600 | -0.00013500 |
| H | 1.19424100  | -1.84207400 | -0.00018700 |

|   |             |             |             |
|---|-------------|-------------|-------------|
| O | 0.39142300  | 2.51322900  | 0.00011300  |
| H | -0.55322200 | 2.15055000  | 0.00009100  |
| N | 1.61637300  | -0.89943200 | -0.00014800 |
| N | -1.56899400 | 0.86343200  | 0.00006800  |
| C | -4.94734600 | -0.79286400 | 0.00007400  |
| C | 4.92279200  | 0.80780400  | -0.00007600 |
| O | 5.42299000  | 1.91572600  | 0.00004300  |
| O | -5.49362100 | -1.87898700 | 0.00004400  |
| C | -7.06791000 | 0.29566800  | 0.00017700  |
| C | -7.59497300 | 1.71316300  | 0.00024700  |
| H | -7.38750800 | -0.26019000 | 0.88517400  |
| H | -7.38756400 | -0.26012300 | -0.88484100 |
| H | -7.25775900 | 2.25365800  | -0.88784700 |
| H | -8.68825600 | 1.69730300  | 0.00028000  |
| H | -7.25770400 | 2.25359100  | 0.88836000  |
| C | 7.08064800  | -0.20604900 | -0.00010500 |
| C | 7.65441300  | -1.60494500 | -0.00017200 |
| H | 7.37974200  | 0.36020600  | 0.88532600  |
| H | 7.37976800  | 0.36030100  | -0.88546700 |
| H | 7.33585300  | -2.15619100 | -0.88849500 |
| H | 8.74643700  | -1.55186100 | -0.00015300 |
| H | 7.33582700  | -2.15628600 | 0.88808300  |
| O | 5.63257200  | -0.33597200 | -0.00013500 |
| O | -5.61761400 | 0.37648600  | 0.00013400  |

The geometric structure coordinates of T3\* in dichloromethane.

|   |            |             |             |
|---|------------|-------------|-------------|
| C | 0.68276800 | 0.16645000  | -0.00000300 |
| C | 2.93271400 | -0.69390300 | -0.00029200 |
| C | 3.47814100 | 0.59235600  | -0.00013700 |
| C | 2.61859300 | 1.69615600  | 0.00008000  |

|   |             |             |             |
|---|-------------|-------------|-------------|
| C | 1.20170300  | 1.54633900  | 0.00015200  |
| C | -0.68274200 | -0.16672700 | 0.00006400  |
| C | -1.20180000 | -1.54657800 | -0.00008000 |
| C | -2.61870700 | -1.69625700 | 0.00001200  |
| C | -3.47815500 | -0.59238200 | 0.00023300  |
| C | -2.93261300 | 0.69382900  | 0.00036200  |
| H | 3.53374400  | -1.59107500 | -0.00047300 |
| H | 3.02064100  | 2.70129500  | 0.00019500  |
| H | -3.02084900 | -2.70135800 | -0.00008500 |
| H | -3.53356400 | 1.59105400  | 0.00053900  |
| O | -0.41554100 | -2.53572400 | -0.00026400 |
| H | 1.18102500  | -1.80462500 | -0.00033500 |
| O | 0.41532300  | 2.53539000  | 0.00033900  |
| H | -1.18081900 | 1.80438700  | 0.00037800  |
| N | 1.60827800  | -0.86221800 | -0.00023100 |
| N | -1.60816400 | 0.86202000  | 0.00028700  |
| C | -4.94443700 | -0.80391500 | 0.00034000  |
| C | 4.94440300  | 0.80402100  | -0.00020800 |
| O | 5.46837200  | 1.89935000  | 0.00003700  |
| O | -5.46850500 | -1.89919700 | -0.00001100 |
| C | -7.08150300 | 0.25314200  | 0.00003300  |
| C | -7.62699300 | 1.66334400  | -0.00002700 |
| H | -7.39205700 | -0.30705600 | 0.88531800  |
| H | -7.39180300 | -0.30703200 | -0.88535500 |
| H | -7.29727100 | 2.20816300  | -0.88825200 |
| H | -8.71989400 | 1.63229900  | -0.00018600 |
| H | -7.29752900 | 2.20813900  | 0.88830800  |
| C | 7.08156100  | -0.25285000 | -0.00020700 |
| C | 7.62717300  | -1.66300400 | -0.00028100 |
| H | 7.39189900  | 0.30730100  | 0.88518300  |



|   |             |             |             |
|---|-------------|-------------|-------------|
| H | 7.39197900  | 0.30742600  | -0.88549000 |
| H | 7.29766700  | -2.20777900 | -0.88861400 |
| H | 8.72007100  | -1.63186400 | -0.00023100 |
| H | 7.29758800  | -2.20790200 | 0.88794600  |
| O | 5.63100700  | -0.35349400 | -0.00028300 |
| O | -5.63094100 | 0.35366000  | 0.00024800  |

The geometric structure coordinates of TS\* of N\*-T1\*/T2\* path in dichloromethane.

|   |             |             |             |
|---|-------------|-------------|-------------|
| C | 0.67835141  | 0.21578615  | -0.00000859 |
| C | 2.84983041  | -0.69616885 | -0.00009659 |
| C | 3.44111741  | 0.58743315  | -0.00001159 |
| C | 2.60254841  | 1.71718715  | 0.00007541  |
| C | 1.22054241  | 1.55166815  | 0.00007841  |
| C | -0.70574159 | -0.07330285 | -0.00000759 |
| C | -1.18006159 | -1.46056685 | -0.00009559 |
| C | -2.56345459 | -1.68786285 | -0.00008659 |
| C | -3.43802759 | -0.59541085 | 0.00000441  |
| C | -2.89294359 | 0.71386415  | 0.00008541  |
| H | 3.45865341  | -1.59070285 | -0.00016559 |
| H | 3.02264941  | 2.71451715  | 0.00013941  |
| H | -2.93762059 | -2.70348485 | -0.00014959 |
| H | -3.55139859 | 1.57350215  | 0.00015541  |
| O | -0.31649759 | -2.43434585 | -0.00017759 |
| H | 0.72582241  | -1.91408285 | -0.00015759 |
| O | 0.42096841  | 2.61161115  | 0.00015941  |
| H | -0.52792259 | 2.26917315  | 0.00014941  |
| N | 1.54254941  | -0.86227485 | -0.00009459 |
| N | -1.59226359 | 0.96528215  | 0.00007941  |
| C | -4.89337459 | -0.83589185 | 0.00001741  |
| C | 4.90133441  | 0.77396415  | -0.00001359 |

|   |             |             |             |
|---|-------------|-------------|-------------|
| O | 5.44904741  | 1.86182715  | 0.00005741  |
| O | -5.39921859 | -1.94300485 | -0.00005259 |
| C | -7.05253159 | 0.17519315  | 0.00014441  |
| C | -7.63093059 | 1.57247915  | 0.00026541  |
| H | -7.35160659 | -0.39214985 | 0.88514241  |
| H | -7.35165359 | -0.39201585 | -0.88492259 |
| H | -7.31360159 | 2.12488915  | -0.88781059 |
| H | -8.72287059 | 1.51674815  | 0.00029041  |
| H | -7.31355459 | 2.12475515  | 0.88840841  |
| C | 7.02158541  | -0.31650085 | -0.00012259 |
| C | 7.54949041  | -1.73370285 | -0.00022259 |
| H | 7.34154341  | 0.23953815  | 0.88480641  |
| H | 7.34151441  | 0.23965115  | -0.88499059 |
| H | 7.21254741  | -2.27429585 | -0.88837559 |
| H | 8.64276041  | -1.71726985 | -0.00024059 |
| H | 7.21257841  | -2.27440985 | 0.88787341  |
| O | 5.57204041  | -0.39759985 | -0.00010459 |
| O | -5.60652859 | 0.30893815  | 0.00011741  |

The geometric structure coordinates of TS\* of T1\*/T2\*-T3\* path in dichloromethane.

|   |             |             |             |
|---|-------------|-------------|-------------|
| C | -0.68892567 | -0.04678075 | 0.00001518  |
| C | -2.95680067 | 0.73381125  | -0.00009482 |
| C | -3.44801067 | -0.57383075 | 0.00001218  |
| C | -2.54302267 | -1.64958975 | 0.00012318  |
| C | -1.15676767 | -1.41830975 | 0.00012618  |
| C | 0.69010033  | 0.26932825  | 0.00000718  |
| C | 1.23109833  | 1.63834325  | -0.00010282 |
| C | 2.65027433  | 1.74653525  | -0.00010182 |
| C | 3.46360133  | 0.60644725  | -0.00000182 |
| C | 2.85951633  | -0.66212175 | 0.00010518  |

|   |             |             |             |
|---|-------------|-------------|-------------|
| H | -3.59663267 | 1.60382325  | -0.00018082 |
| H | -2.90606067 | -2.66897875 | 0.00020618  |
| H | 3.09043033  | 2.73570925  | -0.00018082 |
| H | 3.44512133  | -1.57102575 | 0.00018818  |
| O | 0.45279733  | 2.63466225  | -0.00019082 |
| H | -1.25379267 | 1.90802925  | -0.00016382 |
| O | -0.29460767 | -2.39118975 | 0.00022518  |
| H | 0.77348933  | -1.83350675 | 0.00018918  |
| N | -1.64341467 | 0.95558125  | -0.00008982 |
| N | 1.53381933  | -0.80574075 | 0.00010818  |
| C | 4.93468833  | 0.76021025  | -0.00000582 |
| C | -4.90243967 | -0.84835475 | 0.00000618  |
| O | -5.37675867 | -1.96673075 | 0.00009918  |
| O | 5.50480433  | 1.83374425  | -0.00009182 |
| C | 7.03004333  | -0.37729675 | 0.00011218  |
| C | 7.52398533  | -1.80662675 | 0.00022418  |
| H | 7.36223333  | 0.17103625  | 0.88513118  |
| H | 7.36225533  | 0.17090525  | -0.88498182 |
| H | 7.17446633  | -2.33919475 | -0.88790782 |
| H | 8.61733633  | -1.81592275 | 0.00024018  |
| H | 7.17444033  | -2.33906375 | 0.88842418  |
| C | -7.08354067 | 0.11480925  | -0.00014082 |
| C | -7.68920467 | 1.50014125  | -0.00031382 |
| H | -7.36924967 | -0.45815075 | 0.88535018  |
| H | -7.36919667 | -0.45834775 | -0.88552282 |
| H | -7.38340267 | 2.05849225  | -0.88867382 |
| H | -8.77969667 | 1.42193125  | -0.00033682 |
| H | -7.38345567 | 2.05869125  | 0.88793918  |
| O | -5.63858067 | 0.27801325  | -0.00011582 |
| O | 5.57800433  | -0.42429975 | 0.00009818  |

The geometric structure coordinates of N in acetonitrile.

|   |             |             |             |
|---|-------------|-------------|-------------|
| C | 0.71905100  | 0.15298300  | 0.00002100  |
| C | 2.88141200  | -0.71501200 | -0.00003100 |
| C | 3.44352700  | 0.56697600  | 0.00002900  |
| C | 2.59645700  | 1.66870400  | 0.00009900  |
| C | 1.21351200  | 1.48595400  | 0.00009400  |
| C | -0.71904500 | -0.15304500 | -0.00001200 |
| C | -1.21353200 | -1.48600900 | -0.00002000 |
| C | -2.59648100 | -1.66872700 | 0.00003200  |
| C | -3.44352900 | -0.56698100 | 0.00000800  |
| C | -2.88138800 | 0.71499400  | -0.00003000 |
| H | 3.50168700  | -1.60143200 | -0.00009000 |
| H | 2.99975800  | 2.67365900  | 0.00015800  |
| H | -2.99980400 | -2.67367400 | 0.00007000  |
| H | -3.50164500 | 1.60142800  | -0.00004000 |
| O | -0.41863800 | -2.56278800 | -0.00008800 |
| H | 0.52084700  | -2.21909900 | -0.00024100 |
| O | 0.41858800  | 2.56271300  | 0.00016900  |
| H | -0.52088700 | 2.21900100  | 0.00025700  |
| N | 1.56692600  | -0.89802300 | -0.00002400 |
| N | -1.56689900 | 0.89797800  | -0.00002000 |
| C | -4.91849600 | -0.79654000 | 0.00012100  |
| C | 4.91849000  | 0.79656500  | 0.00003000  |
| O | 5.42750000  | 1.89651000  | 0.00020800  |
| O | -5.42752900 | -1.89647500 | 0.00091000  |
| C | -7.06206800 | 0.24267400  | -0.00034800 |
| C | -7.61346800 | 1.64980000  | -0.00001400 |
| H | -7.36676400 | -0.31864200 | 0.88573800  |
| H | -7.36720000 | -0.31834900 | -0.88648200 |

|   |             |             |             |
|---|-------------|-------------|-------------|
| H | -7.28741400 | 2.19616800  | -0.88853700 |
| H | -8.70606100 | 1.61112200  | 0.00002200  |
| H | -7.28733000 | 2.19578400  | 0.88871400  |
| C | 7.06208200  | -0.24260600 | 0.00002400  |
| C | 7.61351000  | -1.64972100 | -0.00032800 |
| H | 7.36696400  | 0.31834900  | 0.88628400  |
| H | 7.36700500  | 0.31879100  | -0.88593700 |
| H | 7.28729600  | -2.19571700 | -0.88902100 |
| H | 8.70610200  | -1.61101700 | -0.00048200 |
| H | 7.28755700  | -2.19608900 | 0.88823000  |
| O | 5.60822600  | -0.34969400 | -0.00002300 |
| O | -5.60821000 | 0.34973200  | -0.00072400 |

The geometric structure coordinates of N\* in acetonitrile.

|   |             |             |             |
|---|-------------|-------------|-------------|
| C | 0.69153300  | -0.14155700 | 0.00009300  |
| C | 2.87036700  | 0.70566000  | 0.00046500  |
| C | 3.44688900  | -0.59156800 | 0.00023700  |
| C | 2.59093900  | -1.70104100 | -0.00002400 |
| C | 1.21148100  | -1.50261700 | -0.00006300 |
| C | -0.69156600 | 0.14123500  | -0.00000600 |
| C | -1.21137200 | 1.50233700  | 0.00010000  |
| C | -2.59080500 | 1.70091800  | 0.00013300  |
| C | -3.44687500 | 0.59153700  | -0.00001600 |
| C | -2.87049100 | -0.70575300 | -0.00020800 |
| H | 3.50682700  | 1.58182600  | 0.00068600  |
| H | 2.98532900  | -2.70887800 | -0.00015400 |
| H | -2.98508400 | 2.70879900  | 0.00023100  |
| H | -3.50704500 | -1.58185100 | -0.00033900 |
| O | -0.39424700 | 2.54070400  | 0.00007700  |
| H | 0.55865700  | 2.16515500  | -0.00028300 |

|   |             |             |             |
|---|-------------|-------------|-------------|
| O | 0.39450800  | -2.54109800 | -0.00016400 |
| H | -0.55845200 | -2.16567300 | 0.00008700  |
| N | 1.57049600  | 0.91876000  | 0.00039500  |
| N | -1.57064100 | -0.91899200 | -0.00019100 |
| C | -4.90378200 | 0.80335400  | 0.00000400  |
| C | 4.90381800  | -0.80323000 | 0.00030000  |
| O | 5.43221100  | -1.90122100 | -0.00018600 |
| O | -5.43205700 | 1.90140200  | 0.00015100  |
| C | -7.04330500 | -0.24956900 | -0.00012700 |
| C | -7.59625800 | -1.65692300 | -0.00026900 |
| H | -7.35354700 | 0.31144800  | -0.88531400 |
| H | -7.35352800 | 0.31126300  | 0.88518400  |
| H | -7.26952800 | -2.20351800 | 0.88802800  |
| H | -8.68897900 | -1.61963300 | -0.00026600 |
| H | -7.26952900 | -2.20333700 | -0.88867900 |
| C | 7.04322900  | 0.24992400  | -0.00015300 |
| C | 7.59602900  | 1.65733800  | -0.00024200 |
| H | 7.35331700  | -0.31094200 | -0.88549000 |
| H | 7.35372700  | -0.31099300 | 0.88500800  |
| H | 7.26945400  | 2.20378000  | 0.88820600  |
| H | 8.68875400  | 1.62016600  | -0.00050500 |
| H | 7.26902800  | 2.20383300  | -0.88850100 |
| O | 5.59473200  | 0.35570900  | 0.00019200  |
| O | -5.59481900 | -0.35551100 | -0.00015300 |

The geometric structure coordinates of T1\*/T2\* in acetonitrile.

|   |            |             |             |
|---|------------|-------------|-------------|
| C | 0.68089800 | 0.11625600  | 0.00003200  |
| C | 2.93607100 | -0.72412400 | -0.00008400 |
| C | 3.46513400 | 0.56561800  | 0.00007100  |
| C | 2.57799700 | 1.66056600  | 0.00020100  |

|   |             |             |             |
|---|-------------|-------------|-------------|
| C | 1.19912600  | 1.45351000  | 0.00018200  |
| C | -0.71836800 | -0.19581300 | 0.00001200  |
| C | -1.23134900 | -1.58393300 | -0.00011400 |
| C | -2.64665900 | -1.72750000 | -0.00015400 |
| C | -3.48124100 | -0.60684900 | -0.00006400 |
| C | -2.88980900 | 0.66969700  | 0.00008000  |
| H | 3.54835600  | -1.61388500 | -0.00019100 |
| H | 2.95960800  | 2.67297600  | 0.00031700  |
| H | -3.06013700 | -2.72825100 | -0.00025200 |
| H | -3.50144300 | 1.56251300  | 0.00016900  |
| O | -0.44203600 | -2.57273500 | -0.00019200 |
| H | 1.20721600  | -1.85127600 | -0.00018600 |
| O | 0.38768600  | 2.50461500  | 0.00030600  |
| H | -0.55719100 | 2.13723900  | 0.00026100  |
| N | 1.61927300  | -0.90620600 | -0.00010000 |
| N | -1.56722100 | 0.85935500  | 0.00011300  |
| C | -4.94858500 | -0.78920400 | -0.00011400 |
| C | 4.92213400  | 0.80937500  | 0.00008900  |
| O | 5.41869800  | 1.91948700  | 0.00021600  |
| O | -5.49723600 | -1.87491500 | -0.00018700 |
| C | -7.06746000 | 0.30381800  | -0.00002300 |
| C | -7.59202200 | 1.72198900  | 0.00004500  |
| H | -7.38836900 | -0.25062700 | 0.88527100  |
| H | -7.38836400 | -0.25054100 | -0.88537100 |
| H | -7.25453300 | 2.26193600  | -0.88829400 |
| H | -8.68528500 | 1.70657300  | 0.00004400  |
| H | -7.25453400 | 2.26185200  | 0.88843500  |
| C | 7.08362800  | -0.19700800 | -0.00005200 |
| C | 7.66255200  | -1.59350600 | -0.00016200 |
| H | 7.38089300  | 0.36950600  | 0.88574700  |

|   |             |             |             |
|---|-------------|-------------|-------------|
| H | 7.38087400  | 0.36963700  | -0.88577400 |
| H | 7.34652200  | -2.14585400 | -0.88870400 |
| H | 8.75428000  | -1.53480600 | -0.00017100 |
| H | 7.34654400  | -2.14598200 | 0.88830800  |
| O | 5.63530200  | -0.33133800 | -0.00004900 |
| O | -5.61630000 | 0.38108400  | -0.00001500 |

The geometric structure coordinates of T3\* in acetonitrile.

|   |             |             |             |
|---|-------------|-------------|-------------|
| C | 0.68219400  | 0.16595800  | 0.00001800  |
| C | 2.93337000  | -0.69457800 | -0.00008400 |
| C | 3.47980500  | 0.59119600  | 0.00004600  |
| C | 2.62046300  | 1.69489400  | 0.00015700  |
| C | 1.20293500  | 1.54648900  | 0.00014100  |
| C | -0.68220000 | -0.16586200 | 0.00000700  |
| C | -1.20289600 | -1.54640600 | -0.00009100 |
| C | -2.62042400 | -1.69485600 | -0.00012200 |
| C | -3.47979900 | -0.59118600 | -0.00005800 |
| C | -2.93339900 | 0.69460600  | 0.00006200  |
| H | 3.53292100  | -1.59262000 | -0.00018400 |
| H | 3.02239300  | 2.70011400  | 0.00025400  |
| H | -3.02232200 | -2.70008900 | -0.00019800 |
| H | -3.53298000 | 1.59262800  | 0.00013300  |
| O | -0.41907500 | -2.53660000 | -0.00012700 |
| H | 1.18703400  | -1.80579900 | -0.00018000 |
| O | 0.41916000  | 2.53672600  | 0.00023800  |
| H | -1.18707500 | 1.80587900  | 0.00016300  |
| N | 1.60912700  | -0.86241500 | -0.00009900 |
| N | -1.60916300 | 0.86248200  | 0.00009500  |
| C | -4.94603000 | -0.80259800 | -0.00011200 |
| C | 4.94604100  | 0.80256400  | 0.00005800  |



|   |             |             |             |
|---|-------------|-------------|-------------|
| O | 5.46919300  | 1.89897000  | 0.00018100  |
| O | -5.46915100 | -1.89901900 | -0.00015000 |
| C | -7.08428500 | 0.25267800  | 0.00000300  |
| C | -7.63124000 | 1.66203500  | 0.00006900  |
| H | -7.39436400 | -0.30701200 | 0.88566800  |
| H | -7.39437400 | -0.30693400 | -0.88570900 |
| H | -7.30281200 | 2.20720800  | -0.88841600 |
| H | -8.72404400 | 1.62825600  | 0.00008000  |
| H | -7.30279300 | 2.20713200  | 0.88859400  |
| C | 7.08426100  | -0.25278600 | -0.00003700 |
| C | 7.63116500  | -1.66216400 | -0.00012900 |
| H | 7.39436100  | 0.30679500  | 0.88568900  |
| H | 7.39436700  | 0.30691200  | -0.88568800 |
| H | 7.30270800  | -2.20722900 | -0.88867000 |
| H | 8.72397000  | -1.62842300 | -0.00012400 |
| H | 7.30270500  | -2.20734400 | 0.88834100  |
| O | 5.63304100  | -0.35381100 | -0.00005100 |
| O | -5.63306800 | 0.35375200  | -0.00000200 |

The geometric structure coordinates of TS\* of N\*-T1\*/T2\* path in acetonitrile.

|   |             |             |             |
|---|-------------|-------------|-------------|
| C | 0.67734070  | 0.21349285  | -0.00000156 |
| C | 2.84933170  | -0.69681015 | -0.00005456 |
| C | 3.44007770  | 0.58737185  | 0.00003944  |
| C | 2.60120070  | 1.71681185  | 0.00011044  |
| C | 1.21945770  | 1.55086585  | 0.00009144  |
| C | -0.70441230 | -0.07464015 | -0.00001856 |
| C | -1.17935030 | -1.46202215 | -0.00010956 |
| C | -2.56290630 | -1.68848415 | -0.00012156 |
| C | -3.43693030 | -0.59553415 | -0.00004656 |
| C | -2.89140830 | 0.71435585  | 0.00004044  |

|   |             |             |             |
|---|-------------|-------------|-------------|
| H | 3.45846670  | -1.59106015 | -0.00011456 |
| H | 3.02055170  | 2.71443685  | 0.00017944  |
| H | -2.93722630 | -2.70406715 | -0.00018856 |
| H | -3.54981830 | 1.57396585  | 0.00010144  |
| O | -0.31635730 | -2.43623315 | -0.00017456 |
| H | 0.72446570  | -1.91720615 | -0.00014356 |
| O | 0.41826270  | 2.60905885  | 0.00015744  |
| H | -0.53069930 | 2.26293485  | 0.00013544  |
| N | 1.54240170  | -0.86423815 | -0.00007256 |
| N | -1.59178230 | 0.96545585  | 0.00005344  |
| C | -4.89227830 | -0.83492315 | -0.00005656 |
| C | 4.90033570  | 0.77445985  | 0.00006244  |
| O | 5.44680870  | 1.86344185  | 0.00013944  |
| O | -5.39852630 | -1.94249215 | -0.00012956 |
| C | -7.05173730 | 0.17663885  | 0.00002844  |
| C | -7.63030530 | 1.57361685  | 0.00011344  |
| H | -7.35109330 | -0.38988415 | 0.88537044  |
| H | -7.35110730 | -0.38978215 | -0.88537256 |
| H | -7.31362930 | 2.12602485  | -0.88821656 |
| H | -8.72214330 | 1.51627385  | 0.00011944  |
| H | -7.31361330 | 2.12592385  | 0.88849944  |
| C | 7.02190470  | -0.31459115 | -0.00000056 |
| C | 7.55078170  | -1.73117915 | -0.00007756 |
| H | 7.34162770  | 0.24083585  | 0.88527544  |
| H | 7.34163170  | 0.24093185  | -0.88521556 |
| H | 7.21486770  | -2.27202515 | -0.88847356 |
| H | 8.64398870  | -1.71251015 | -0.00007556 |
| H | 7.21486570  | -2.27212115 | 0.88826044  |
| O | 5.57166670  | -0.39587615 | -0.00000956 |
| O | -5.60506930 | 0.30962285  | 0.00002544  |

The geometric structure coordinates of TS\* of T1\*/T2\*-T3\* path in acetonitrile.

|   |             |             |             |
|---|-------------|-------------|-------------|
| C | 0.68832855  | -0.04162409 | -0.00001282 |
| C | 2.95836955  | 0.73548391  | 0.00004118  |
| C | 3.44858555  | -0.57247909 | -0.00002982 |
| C | 2.54204155  | -1.64701009 | -0.00009082 |
| C | 1.15659355  | -1.41389609 | -0.00008282 |
| C | -0.68919845 | 0.27309591  | -0.00000282 |
| C | -1.23300945 | 1.64239791  | 0.00006918  |
| C | -2.65333645 | 1.74748191  | 0.00008618  |
| C | -3.46491545 | 0.60665891  | 0.00003118  |
| C | -2.85790345 | -0.66120809 | -0.00004782 |
| H | 3.59806755  | 1.60557991  | 0.00009318  |
| H | 2.90281355  | -2.66723609 | -0.00014382 |
| H | -3.09440245 | 2.73627391  | 0.00014218  |
| H | -3.44192145 | -1.57112809 | -0.00009982 |
| O | -0.45853245 | 2.64018191  | 0.00011318  |
| H | 1.26359155  | 1.91361891  | 0.00009518  |
| O | 0.29445555  | -2.38762109 | -0.00013582 |
| H | -0.76856045 | -1.83310909 | -0.00010882 |
| N | 1.64547255  | 0.95931291  | 0.00004818  |
| N | -1.53298845 | -0.80322009 | -0.00006282 |
| C | -4.93606845 | 0.75774291  | 0.00005118  |
| C | 4.90258555  | -0.84885909 | -0.00003982 |
| O | 5.37464155  | -1.96883509 | -0.00010082 |
| O | -5.50758545 | 1.83125891  | 0.00011718  |
| C | -7.03040045 | -0.38281109 | -0.00000282 |
| C | -7.52237545 | -1.81258909 | -0.00007482 |
| H | -7.36357845 | 0.16418691  | -0.88536282 |
| H | -7.36357245 | 0.16409591  | 0.88541618  |

|   |             |             |             |
|---|-------------|-------------|-------------|
| H | -7.17270645 | -2.34468609 | 0.88829518  |
| H | -8.61569445 | -1.82204909 | -0.00007282 |
| H | -7.17270945 | -2.34459509 | -0.88849982 |
| C | 7.08599455  | 0.10959291  | 0.00002018  |
| C | 7.69472555  | 1.49333091  | 0.00008818  |
| H | 7.37066055  | -0.46325409 | -0.88580982 |
| H | 7.37065455  | -0.46333809 | 0.88579818  |
| H | 7.39065055  | 2.05234991  | 0.88862718  |
| H | 8.78492655  | 1.41118491  | 0.00008918  |
| H | 7.39065755  | 2.05243391  | -0.88840082 |
| O | 5.64069755  | 0.27523491  | 0.00002418  |
| O | -5.57766645 | -0.42703009 | -0.00001082 |

The geometric structure coordinates of N under  $E_x = 0$  a.u.

|   |             |             |             |
|---|-------------|-------------|-------------|
| C | 0.71970200  | 0.15199500  | -0.00006300 |
| C | 2.88062100  | -0.71668000 | 0.00023100  |
| C | 3.44486500  | 0.56410800  | 0.00009200  |
| C | 2.60014600  | 1.66674000  | -0.00015200 |
| C | 1.21578500  | 1.48649300  | -0.00024800 |
| C | -0.71971000 | -0.15189400 | -0.00007700 |
| C | -1.21575100 | -1.48640800 | 0.00009600  |
| C | -2.60010600 | -1.66670000 | 0.00000700  |
| C | -3.44486200 | -0.56409700 | -0.00022100 |
| C | -2.88065900 | 0.71670900  | -0.00035100 |
| H | 3.50495000  | -1.60019000 | 0.00041700  |
| H | 3.00799100  | 2.66955800  | -0.00029400 |
| H | -3.00791800 | -2.66953100 | 0.00013200  |
| H | -3.50501700 | 1.60019800  | -0.00052300 |
| O | -0.42792200 | -2.56420300 | 0.00034100  |
| H | 0.51145900  | -2.22947200 | 0.00054900  |

|   |             |             |             |
|---|-------------|-------------|-------------|
| O | 0.42799700  | 2.56431700  | -0.00054900 |
| H | -0.51139100 | 2.22960900  | -0.00071900 |
| N | 1.56661100  | -0.90076800 | 0.00014600  |
| N | -1.56665400 | 0.90084100  | -0.00028300 |
| C | -4.91872800 | -0.79486800 | -0.00027100 |
| C | 4.91873700  | 0.79483200  | 0.00018600  |
| O | 5.43292800  | 1.88760900  | 0.00008200  |
| O | -5.43288200 | -1.88766200 | -0.00001600 |
| C | -7.05623800 | 0.23839900  | -0.00063300 |
| C | -7.62233900 | 1.64255600  | 0.00169200  |
| H | -7.35763300 | -0.33280000 | 0.88077800  |
| H | -7.35796300 | -0.32992100 | -0.88382700 |
| H | -7.29604500 | 2.19268400  | -0.88349700 |
| H | -8.71452300 | 1.60298000  | 0.00114500  |
| H | -7.29679100 | 2.18952000  | 0.88911700  |
| C | 7.05621500  | -0.23850900 | 0.00043100  |
| C | 7.62227600  | -1.64268500 | -0.00045500 |
| H | 7.35776400  | 0.33064700  | 0.88313100  |
| H | 7.35781900  | 0.33183700  | -0.88147600 |
| H | 7.29586400  | -2.19077000 | -0.88686600 |
| H | 8.71446000  | -1.60314200 | -0.00102300 |
| H | 7.29680800  | -2.19167100 | 0.88575200  |
| O | 5.61092500  | -0.36020500 | 0.00044100  |
| O | -5.61095400 | 0.36014500  | -0.00072700 |

The geometric structure coordinates of N\* under  $E_x = 0$  a.u.

|   |            |             |             |
|---|------------|-------------|-------------|
| C | 0.69836100 | 0.14243300  | 0.00005700  |
| C | 2.87503200 | -0.70515600 | -0.00027500 |
| C | 3.45299100 | 0.58692300  | 0.00004100  |
| C | 2.59844400 | 1.69638600  | 0.00031100  |

|   |             |             |             |
|---|-------------|-------------|-------------|
| C | 1.21784300  | 1.49821200  | 0.00028300  |
| C | -0.69835000 | -0.14253200 | 0.00010400  |
| C | -1.21787700 | -1.49830000 | -0.00008600 |
| C | -2.59848600 | -1.69642400 | -0.00017000 |
| C | -3.45299500 | -0.58693200 | 0.00001800  |
| C | -2.87499200 | 0.70512600  | 0.00030200  |
| H | 3.51334900  | -1.57983200 | -0.00049600 |
| H | 2.99909600  | 2.70133000  | 0.00050200  |
| H | -2.99917400 | -2.70135400 | -0.00033100 |
| H | -3.51327900 | 1.57982400  | 0.00045800  |
| O | -0.40514600 | -2.54262200 | -0.00007900 |
| H | 0.54568600  | -2.17467600 | 0.00032800  |
| O | 0.40506100  | 2.54249600  | 0.00037500  |
| H | -0.54574700 | 2.17450400  | 0.00004400  |
| N | 1.57070200  | -0.91698000 | -0.00026200 |
| N | -1.57065400 | 0.91690800  | 0.00033600  |
| C | -4.91079300 | -0.80191300 | -0.00005100 |
| C | 4.91078200  | 0.80195300  | 0.00006200  |
| O | 5.44014200  | 1.89373700  | 0.00035200  |
| O | -5.44019100 | -1.89367900 | -0.00041900 |
| C | -7.04337800 | 0.24666900  | -0.00024100 |
| C | -7.60918800 | 1.65157300  | 0.00047400  |
| H | -7.34953000 | -0.32307000 | 0.88112800  |
| H | -7.34936200 | -0.32207600 | -0.88231900 |
| H | -7.28233900 | 2.20052900  | -0.88543700 |
| H | -8.70154500 | 1.61395100  | 0.00030700  |
| H | -7.28257200 | 2.19952600  | 0.88709100  |
| C | 7.04340200  | -0.24655700 | -0.00012400 |
| C | 7.60925900  | -1.65144300 | -0.00066200 |
| H | 7.34945200  | 0.32235400  | 0.88182100  |

|   |             |             |             |
|---|-------------|-------------|-------------|
| H | 7.34944900  | 0.32303500  | -0.88162700 |
| H | 7.28254500  | -2.19956500 | -0.88713900 |
| H | 8.70161400  | -1.61378400 | -0.00064600 |
| H | 7.28254400  | -2.20025100 | 0.88538900  |
| O | 5.60194900  | -0.36574600 | -0.00016200 |
| O | -5.60192200 | 0.36580900  | -0.00004700 |

The geometric structure coordinates of T1\*/T2\* under  $E_x = 0$  a.u.

|   |             |             |             |
|---|-------------|-------------|-------------|
| C | -0.68479900 | 0.16701400  | 0.14076100  |
| C | -2.93168500 | -0.70643600 | 0.16394500  |
| C | -3.46116000 | 0.55600200  | -0.01428000 |
| C | -2.58908900 | 1.66640600  | -0.09711800 |
| C | -1.21217700 | 1.48013500  | -0.01245400 |
| C | 0.73162800  | -0.13574500 | 0.04469700  |
| C | 1.22200500  | -1.51503800 | -0.10409100 |
| C | 2.61186100  | -1.68321200 | -0.07863200 |
| C | 3.47302800  | -0.57364400 | -0.00626200 |
| C | 2.91986500  | 0.69867700  | 0.07250200  |
| H | -3.54307300 | -1.59117300 | 0.25554200  |
| H | -2.99020100 | 2.66436800  | -0.20310300 |
| H | 3.01913600  | -2.67712700 | -0.20506800 |
| H | 3.53726600  | 1.58636600  | 0.06388400  |
| O | 0.38142000  | -2.47928400 | -0.20029700 |
| H | -1.19086300 | -1.80496400 | 0.29375100  |
| O | -0.41269100 | 2.54587500  | -0.07550300 |
| H | 0.52105100  | 2.22442700  | 0.04173400  |
| N | -1.60198400 | -0.86555000 | 0.27649600  |
| N | 1.59483000  | 0.87826400  | 0.14637100  |
| C | 4.93644700  | -0.80173200 | -0.05346800 |
| C | -4.92409100 | 0.78107300  | -0.08153900 |

|   |             |             |             |
|---|-------------|-------------|-------------|
| O | -5.43358100 | 1.86772600  | -0.23026600 |
| O | 5.45252400  | -1.89112400 | -0.16090900 |
| C | 7.07875000  | 0.22167500  | -0.00240400 |
| C | 7.65586600  | 1.61738600  | 0.10925000  |
| H | 7.36174200  | -0.26986400 | -0.93672600 |
| H | 7.39618900  | -0.42430400 | 0.82011800  |
| H | 7.34971700  | 2.08839300  | 1.04588900  |
| H | 8.74767600  | 1.57250500  | 0.08525200  |
| H | 7.31752100  | 2.24322100  | -0.71947200 |
| C | -7.06836500 | -0.24169900 | -0.03287800 |
| C | -7.64774700 | -1.63230000 | 0.12016200  |
| H | -7.33492100 | 0.21521200  | -0.98917000 |
| H | -7.39753500 | 0.43402400  | 0.76042400  |
| H | -7.35953300 | -2.06838800 | 1.07917500  |
| H | -8.73880500 | -1.58789500 | 0.07521100  |
| H | -7.29600300 | -2.28839000 | -0.67905200 |
| O | -5.62661200 | -0.36895900 | 0.03464100  |
| O | 5.63752600  | 0.35116600  | 0.03763500  |

The geometric structure coordinates of T3\* in under  $E_x = 0$  a.u.

|   |             |             |             |
|---|-------------|-------------|-------------|
| C | -0.68651200 | -0.16804900 | -0.00003400 |
| C | -2.92805500 | 0.69444200  | -0.00004500 |
| C | -3.46994800 | -0.59228600 | -0.00003700 |
| C | -2.61148600 | -1.69788700 | -0.00002800 |
| C | -1.19711300 | -1.54426200 | -0.00003100 |
| C | 0.68660400  | 0.16797500  | -0.00003200 |
| C | 1.19705900  | 1.54436300  | -0.00004500 |
| C | 2.61150300  | 1.69791900  | -0.00004700 |
| C | 3.46989000  | 0.59229500  | -0.00003700 |
| C | 2.92805700  | -0.69449000 | -0.00002300 |



|   |             |             |             |
|---|-------------|-------------|-------------|
| H | -3.53867900 | 1.58478300  | -0.00005400 |
| H | -3.01822700 | -2.70041800 | -0.00001700 |
| H | 3.01834100  | 2.70041300  | -0.00005900 |
| H | 3.53882100  | -1.58473800 | -0.00001000 |
| O | 0.39977100  | 2.52810800  | -0.00005800 |
| H | -1.14388200 | 1.80254200  | -0.00004900 |
| O | -0.39975200 | -2.52809000 | -0.00002400 |
| H | 1.14382700  | -1.80275600 | -0.00001400 |
| N | -1.60136100 | 0.86491700  | -0.00004200 |
| N | 1.60143800  | -0.86505700 | -0.00002100 |
| C | 4.93644800  | 0.80641500  | -0.00004100 |
| C | -4.93650700 | -0.80641800 | -0.00003300 |
| O | -5.46393100 | -1.89469300 | -0.00001400 |
| O | 5.46389200  | 1.89468300  | -0.00003700 |
| C | 7.06696800  | -0.24810600 | -0.00000600 |
| C | 7.62649100  | -1.65525800 | 0.00039000  |
| H | 7.37359300  | 0.31995700  | 0.88191100  |
| H | 7.37366300  | 0.31947500  | -0.88221300 |
| H | 7.29831800  | -2.20266100 | -0.88597400 |
| H | 8.71890000  | -1.62159600 | 0.00040500  |
| H | 7.29827600  | -2.20217300 | 0.88704000  |
| C | -7.06700400 | 0.24815100  | -0.00002700 |
| C | -7.62647100 | 1.65532100  | 0.00020300  |
| H | -7.37363900 | -0.31979500 | 0.88196000  |
| H | -7.37369300 | -0.31952600 | -0.88217000 |
| H | -7.29825900 | 2.20261500  | -0.88621300 |
| H | -8.71888300 | 1.62169600  | 0.00019300  |
| H | -7.29826600 | 2.20232100  | 0.88680300  |
| O | -5.62296500 | 0.36135500  | -0.00005700 |
| O | 5.62295100  | -0.36135300 | -0.00004200 |

The geometric structure coordinates of TS\* of N\*-T1\*/T2\* path under  $E_x = 0$  a.u.

|   |             |             |             |
|---|-------------|-------------|-------------|
| C | -0.68853283 | 0.22821299  | 0.00001491  |
| C | -2.85355483 | -0.69615501 | -0.00008309 |
| C | -3.44892083 | 0.58278099  | 0.00002591  |
| C | -2.61424283 | 1.71455799  | 0.00013291  |
| C | -1.22955083 | 1.55411299  | 0.00012891  |
| C | 0.71394617  | -0.06435401 | 0.00000091  |
| C | 1.18741417  | -1.44953801 | -0.00012009 |
| C | 2.56859417  | -1.67989901 | -0.00013009 |
| C | 3.44671017  | -0.58788001 | -0.00002609 |
| C | 2.90344117  | 0.71184099  | 0.00008691  |
| H | -3.46218183 | -1.59052501 | -0.00016709 |
| H | -3.04294583 | 2.70768799  | 0.00021791  |
| H | 2.94625417  | -2.69380301 | -0.00021809 |
| H | 3.56110717  | 1.57159199  | 0.00016891  |
| O | 0.32133517  | -2.42440901 | -0.00021409 |
| H | -0.72236783 | -1.90112601 | -0.00017509 |
| O | -0.44110083 | 2.62636099  | 0.00022991  |
| H | 0.50407917  | 2.30029799  | 0.00020891  |
| N | -1.54410283 | -0.85425301 | -0.00008709 |
| N | 1.59126917  | 0.96520299  | 0.00009991  |
| C | 4.90295917  | -0.83599701 | -0.00003809 |
| C | -4.90965483 | 0.76848799  | 0.00003191  |
| O | -5.46211383 | 1.84910199  | 0.00012391  |
| O | 5.40401517  | -1.93951901 | -0.00013309 |
| C | 7.05933917  | 0.16225499  | 0.00006591  |
| C | 7.65575617  | 1.55426399  | 0.00019191  |
| H | 7.35171717  | -0.41348401 | -0.88188909 |
| H | 7.35170517  | -0.41363801 | 0.88192391  |

|   |             |             |             |
|---|-------------|-------------|-------------|
| H | 7.34147117  | 2.10970999  | 0.88655791  |
| H | 8.74695517  | 1.49217799  | 0.00019391  |
| H | 7.34148317  | 2.10986499  | -0.88608009 |
| C | -7.02084783 | -0.32332901 | -0.00008109 |
| C | -7.55891483 | -1.73921001 | -0.00020909 |
| H | -7.33866983 | 0.23958499  | -0.88171909 |
| H | -7.33868283 | 0.23943099  | 0.88164991  |
| H | -7.22136783 | -2.28121001 | 0.88601391  |
| H | -8.65181583 | -1.72341001 | -0.00021609 |
| H | -7.22135483 | -2.28105501 | -0.88652009 |
| O | -5.57779283 | -0.41403601 | -0.00007909 |
| O | 5.61972117  | 0.31354099  | 0.00006991  |

The geometric structure coordinates of TS\* of T1\*/T2\*-T3\* path under  $E_x = 0$  a.u.

|   |             |             |             |
|---|-------------|-------------|-------------|
| C | -0.69420860 | -0.06879035 | -0.00000879 |
| C | -2.94834560 | 0.72987265  | -0.00001379 |
| C | -3.44501160 | -0.57617035 | 0.00001121  |
| C | -2.54975060 | -1.65758235 | 0.00002621  |
| C | -1.15759160 | -1.43804335 | 0.00001621  |
| C | 0.69543940  | 0.25141565  | -0.00001079 |
| C | 1.22395340  | 1.61583265  | -0.00003079 |
| C | 2.63622140  | 1.73698165  | -0.00003179 |
| C | 3.45792540  | 0.59798865  | -0.00001279 |
| C | 2.86831540  | -0.66992735 | 0.00000621  |
| H | -3.59171160 | 1.59676465  | -0.00002779 |
| H | -2.92582860 | -2.67180435 | 0.00004521  |
| H | 3.07621740  | 2.72541265  | -0.00004479 |
| H | 3.46137240  | -1.57336835 | 0.00002321  |
| O | 0.42588140  | 2.60580365  | -0.00004879 |
| H | -1.19990360 | 1.88625665  | -0.00003979 |

|   |             |             |             |
|---|-------------|-------------|-------------|
| O | -0.29862760 | -2.40652635 | 0.00002821  |
| H | 0.79980840  | -1.82869835 | 0.00001721  |
| N | -1.63237660 | 0.94205665  | -0.00002379 |
| N | 1.53511640  | -0.81970735 | 0.00000521  |
| C | 4.92879540  | 0.76787265  | -0.00001179 |
| C | -4.90220560 | -0.84269235 | 0.00002121  |
| O | -5.38875660 | -1.95048235 | 0.00004221  |
| O | 5.48936840  | 1.84063565  | -0.00002579 |
| C | 7.02860840  | -0.34502635 | 0.00001021  |
| C | 7.54938840  | -1.76715735 | 0.00003321  |
| H | 7.35174240  | 0.21402665  | 0.88192021  |
| H | 7.35174740  | 0.21400065  | -0.88191379 |
| H | 7.20567940  | -2.30501735 | -0.88628679 |
| H | 8.64236640  | -1.76401635 | 0.00003521  |
| H | 7.20567440  | -2.30499135 | 0.88636721  |
| C | -7.06937160 | 0.13431965  | 0.00001121  |
| C | -7.67902260 | 1.52039265  | -0.00001079 |
| H | -7.35504160 | -0.44419335 | 0.88214521  |
| H | -7.35504760 | -0.44422435 | -0.88209979 |
| H | -7.37093460 | 2.07897865  | -0.88659479 |
| H | -8.76947160 | 1.44725465  | -0.00000579 |
| H | -7.37092760 | 2.07900965  | 0.88655121  |
| O | -5.62995360 | 0.29932865  | 0.00000321  |
| O | 5.58309140  | -0.41886435 | 0.00000821  |

The geometric structure coordinates of N under  $E_x = +1 \times 10^{-4}$  a.u.

|   |            |             |             |
|---|------------|-------------|-------------|
| C | 0.71986300 | 0.15193500  | -0.00002700 |
| C | 2.88090500 | -0.71636900 | 0.00000700  |
| C | 3.44503300 | 0.56440400  | 0.00015100  |
| C | 2.60011000 | 1.66701100  | 0.00015700  |

|   |             |             |             |
|---|-------------|-------------|-------------|
| C | 1.21582100  | 1.48661100  | 0.00003500  |
| C | -0.71953700 | -0.15196000 | -0.00001700 |
| C | -1.21568500 | -1.48634200 | -0.00008400 |
| C | -2.60008300 | -1.66646200 | -0.00020300 |
| C | -3.44464000 | -0.56384200 | -0.00019900 |
| C | -2.88030300 | 0.71696800  | -0.00005200 |
| H | 3.50521500  | -1.59989200 | -0.00002400 |
| H | 3.00771900  | 2.66991700  | 0.00021100  |
| H | -3.00816000 | -2.66919100 | -0.00025200 |
| H | -3.50464000 | 1.60046000  | -0.00002100 |
| O | -0.42806200 | -2.56439700 | 0.00003200  |
| H | 0.51122400  | -2.22998600 | 0.00030900  |
| O | 0.42787100  | 2.56422200  | -0.00008800 |
| H | -0.51156500 | 2.22923200  | -0.00037300 |
| N | 1.56691500  | -0.90062200 | -0.00007700 |
| N | -1.56630100 | 0.90094900  | 0.00003700  |
| C | -4.91873500 | -0.79474800 | -0.00029500 |
| C | 4.91870200  | 0.79496600  | 0.00024900  |
| O | 5.43356800  | 1.88745600  | 0.00032300  |
| O | -5.43218000 | -1.88778200 | -0.00029800 |
| C | -7.05633000 | 0.23836900  | -0.00012900 |
| C | -7.62257200 | 1.64243700  | 0.00112000  |
| H | -7.35762800 | -0.33219900 | 0.88171100  |
| H | -7.35786800 | -0.33067800 | -0.88287900 |
| H | -7.29690100 | 2.19179700  | -0.88476800 |
| H | -8.71470800 | 1.60258700  | 0.00114800  |
| H | -7.29679100 | 2.19025300  | 0.88792100  |
| C | 7.05592300  | -0.23859600 | 0.00019400  |
| C | 7.62200800  | -1.64282500 | -0.00041100 |
| H | 7.35775600  | 0.33075800  | 0.88269800  |

|   |             |             |             |
|---|-------------|-------------|-------------|
| H | 7.35770100  | 0.33150200  | -0.88184200 |
| H | 7.29587100  | -2.19095800 | -0.88688900 |
| H | 8.71422000  | -1.60341200 | -0.00044900 |
| H | 7.29595800  | -2.19169900 | 0.88563800  |
| O | 5.61096100  | -0.36030400 | 0.00018700  |
| O | -5.61081700 | 0.36003300  | -0.00025700 |

The geometric structure coordinates of N\* under  $E_x = +1 \times 10^{-4}$  a.u.

|   |             |             |             |
|---|-------------|-------------|-------------|
| C | 0.69855000  | 0.14412400  | 0.00001900  |
| C | 2.87499600  | -0.70435000 | -0.00004800 |
| C | 3.45331200  | 0.58780300  | 0.00012000  |
| C | 2.59880500  | 1.69753300  | 0.00027600  |
| C | 1.21811700  | 1.49947300  | 0.00024500  |
| C | -0.69819100 | -0.14087700 | -0.00005500 |
| C | -1.21732300 | -1.49713500 | -0.00028600 |
| C | -2.59783800 | -1.69582700 | -0.00026200 |
| C | -3.45259300 | -0.58670000 | -0.00007600 |
| C | -2.87528100 | 0.70536500  | 0.00007600  |
| H | 3.51310800  | -1.57917600 | -0.00017700 |
| H | 2.99947300  | 2.70244200  | 0.00043600  |
| H | -2.99821400 | -2.70088700 | -0.00041300 |
| H | -3.51385000 | 1.57984500  | 0.00022000  |
| O | -0.40396800 | -2.54079100 | -0.00057400 |
| H | 0.54691600  | -2.17175200 | -0.00074100 |
| O | 0.40573100  | 2.54424800  | 0.00048100  |
| H | -0.54500800 | 2.17701000  | 0.00061900  |
| N | 1.57094700  | -0.91578300 | -0.00010100 |
| N | -1.57061300 | 0.91785800  | 0.00009100  |
| C | -4.91068300 | -0.80250800 | -0.00006000 |
| C | 4.91073100  | 0.80217000  | 0.00015100  |

|   |             |             |             |
|---|-------------|-------------|-------------|
| O | 5.44127600  | 1.89356400  | 0.00029700  |
| O | -5.43866100 | -1.89476500 | -0.00014700 |
| C | -7.04382000 | 0.24514100  | 0.00028600  |
| C | -7.60986300 | 1.64987600  | 0.00060000  |
| H | -7.34939600 | -0.32437000 | 0.88195800  |
| H | -7.34954400 | -0.32403400 | -0.88155300 |
| H | -7.28348000 | 2.19858500  | -0.88562800 |
| H | -8.70217800 | 1.61186100  | 0.00068600  |
| H | -7.28333000 | 2.19824900  | 0.88698100  |
| C | 7.04273900  | -0.24754800 | -0.00002600 |
| C | 7.60810800  | -1.65270600 | -0.00025300 |
| H | 7.34932600  | 0.32139600  | 0.88175500  |
| H | 7.34930500  | 0.32167400  | -0.88163500 |
| H | 7.28102800  | -2.20089400 | -0.88656200 |
| H | 8.70050900  | -1.61561600 | -0.00025400 |
| H | 7.28103900  | -2.20117500 | 0.88588600  |
| O | 5.60163800  | -0.36625900 | -0.00002700 |
| O | -5.60198700 | 0.36453900  | 0.00018600  |

The geometric structure coordinates of T1\* under  $E_x = +1 \times 10^{-4}$  a.u.

|   |             |             |             |
|---|-------------|-------------|-------------|
| C | 0.67230400  | 0.16026800  | -0.12103800 |
| C | 2.91475400  | -0.72317100 | -0.13891800 |
| C | 3.44973100  | 0.53875300  | 0.02810100  |
| C | 2.58273700  | 1.65354000  | 0.10282400  |
| C | 1.20447800  | 1.47180000  | 0.02121200  |
| C | -0.74596200 | -0.13707200 | -0.02087300 |
| C | -1.23884600 | -1.51315000 | 0.14445600  |
| C | -2.62981700 | -1.67763700 | 0.12065100  |
| C | -3.48762900 | -0.56674300 | 0.03581100  |
| C | -2.93123200 | 0.70311500  | -0.05709800 |

|   |             |             |             |
|---|-------------|-------------|-------------|
| H | 3.52254400  | -1.61109000 | -0.22336700 |
| H | 2.98793800  | 2.65075700  | 0.19961900  |
| H | -3.03985000 | -2.66888600 | 0.25886900  |
| H | -3.54615700 | 1.59252800  | -0.05794200 |
| O | -0.40178900 | -2.47868900 | 0.25343100  |
| H | 1.16843000  | -1.81549300 | -0.25375100 |
| O | 0.40926800  | 2.54113800  | 0.07606700  |
| H | -0.52568200 | 2.22273100  | -0.03997900 |
| N | 1.58448100  | -0.87774600 | -0.24919600 |
| N | -1.60513500 | 0.87845000  | -0.13383400 |
| C | -4.95218600 | -0.79058500 | 0.08527200  |
| C | 4.91363100  | 0.75767900  | 0.09172800  |
| O | 5.42872900  | 1.84296200  | 0.23126300  |
| O | -5.47036700 | -1.87752800 | 0.20512800  |
| C | -7.09190100 | 0.23757700  | 0.02066100  |
| C | -7.66510600 | 1.63328200  | -0.10891600 |
| H | -7.37655600 | -0.24144400 | 0.96092400  |
| H | -7.41027400 | -0.41787300 | -0.79391700 |
| H | -7.35719200 | 2.09164700  | -1.05122400 |
| H | -8.75701900 | 1.59152400  | -0.08510200 |
| H | -7.32575200 | 2.26858600  | 0.71214700  |
| C | 7.05309400  | -0.27520000 | 0.04945700  |
| C | 7.62620500  | -1.66963700 | -0.09239900 |
| H | 7.32267300  | 0.18848300  | 1.00166600  |
| H | 7.38482700  | 0.39236600  | -0.74970500 |
| H | 7.33510700  | -2.11245100 | -1.04745500 |
| H | 8.71751400  | -1.62981400 | -0.04873100 |
| H | 7.27211900  | -2.31742100 | 0.71253700  |
| O | 5.61104600  | -0.39664000 | -0.01587300 |
| O | -5.64992600 | 0.36260400  | -0.02000900 |



The geometric structure coordinates of T2\* under  $E_x = +1 \times 10^{-4}$  a.u.

|   |             |             |             |
|---|-------------|-------------|-------------|
| C | 0.74596600  | 0.14083500  | 0.02393300  |
| C | 2.93111900  | -0.70087700 | 0.05970500  |
| C | 3.48899400  | 0.56853700  | -0.03284400 |
| C | 2.63166600  | 1.68040800  | -0.11631200 |
| C | 1.24110900  | 1.51674300  | -0.13951300 |
| C | -0.67151800 | -0.15595300 | 0.12359300  |
| C | -1.20339100 | -1.46860500 | -0.01637700 |
| C | -2.58106900 | -1.65101900 | -0.09884300 |
| C | -3.44912600 | -0.53700200 | -0.02681800 |
| C | -2.91543900 | 0.72535100  | 0.13893500  |
| H | 3.54534400  | -1.59081600 | 0.06012000  |
| H | 3.04221600  | 2.67153100  | -0.25360400 |
| H | -2.98562900 | -2.64860100 | -0.19488800 |
| H | -3.52393000 | 1.61292200  | 0.22205100  |
| O | -0.40775400 | -2.53782000 | -0.06929000 |
| H | 0.52710600  | -2.21866700 | 0.04498800  |
| O | 0.40413800  | 2.48288500  | -0.24614100 |
| H | -1.17098700 | 1.81924700  | 0.25700500  |
| N | 1.60551300  | -0.87530800 | 0.13602900  |
| N | -1.58506400 | 0.88113300  | 0.24965300  |
| C | -4.91313100 | -0.75805200 | -0.09159300 |
| C | 4.95293900  | 0.79042800  | -0.08333700 |
| O | 5.47373500  | 1.87648800  | -0.20204000 |
| O | -5.42552800 | -1.84467600 | -0.22948800 |
| C | -7.05418600 | 0.27200800  | -0.05263700 |
| C | -7.62885500 | 1.66594100  | 0.08665200  |
| H | -7.38509800 | -0.39468600 | 0.74750800  |
| H | -7.32232800 | -0.19359100 | -1.00424800 |

|   |             |             |             |
|---|-------------|-------------|-------------|
| H | -7.27533600 | 2.31285200  | -0.71922800 |
| H | -8.72004300 | 1.62459100  | 0.04247100  |
| H | -7.33900900 | 2.11065200  | 1.04120100  |
| C | 7.09126000  | -0.24066800 | -0.02289500 |
| C | 7.66325700  | -1.63735100 | 0.10285300  |
| H | 7.41183700  | 0.41255900  | 0.79269600  |
| H | 7.37574900  | 0.24008700  | -0.96239300 |
| H | 7.32195700  | -2.27041000 | -0.71914700 |
| H | 8.75524100  | -1.59693900 | 0.07780800  |
| H | 7.35575500  | -2.09750400 | 1.04443400  |
| O | 5.64990400  | -0.36440500 | 0.01929100  |
| O | -5.61165700 | 0.39508100  | 0.01319400  |

The geometric structure coordinates of T3\* in under  $E_x = +1 \times 10^{-4}$  a.u.

|   |             |             |             |
|---|-------------|-------------|-------------|
| C | 0.68757400  | 0.16747100  | -0.00023000 |
| C | 2.93019900  | -0.70068100 | -0.00020900 |
| C | 3.47682600  | 0.58355400  | -0.00004200 |
| C | 2.62120500  | 1.69068200  | -0.00001400 |
| C | 1.20552800  | 1.54260400  | -0.00022500 |
| C | -0.68736200 | -0.16624000 | -0.00006700 |
| C | -1.20509900 | -1.54149400 | -0.00009900 |
| C | -2.62074900 | -1.68945400 | -0.00018900 |
| C | -3.47624800 | -0.58250100 | -0.00011700 |
| C | -2.93007000 | 0.70168700  | 0.00001700  |
| H | 3.53693200  | -1.59365200 | -0.00026800 |
| H | 3.02983500  | 2.69244400  | 0.00006100  |
| H | -3.02961400 | -2.69113900 | -0.00022400 |
| H | -3.53698200 | 1.59454800  | 0.00007300  |
| O | -0.41660500 | -2.53113700 | -0.00005300 |
| H | 1.15315600  | -1.80398700 | -0.00033100 |

|   |             |             |             |
|---|-------------|-------------|-------------|
| O | 0.41705300  | 2.53222800  | -0.00033700 |
| H | -1.15269500 | 1.80510400  | 0.00003300  |
| N | 1.60273600  | -0.86646000 | -0.00031200 |
| N | -1.60230100 | 0.86758100  | 0.00004800  |
| C | -4.94382100 | -0.79245900 | -0.00014400 |
| C | 4.94387100  | 0.79252300  | 0.00009100  |
| O | 5.47569700  | 1.87868700  | 0.00021300  |
| O | -5.47374500 | -1.87932500 | -0.00013700 |
| C | -7.07121500 | 0.26849600  | -0.00006200 |
| C | -7.62618100 | 1.67737800  | 0.00121400  |
| H | -7.37929800 | -0.29918800 | 0.88154200  |
| H | -7.37951300 | -0.29756900 | -0.88264200 |
| H | -7.29631600 | 2.22432100  | -0.88480600 |
| H | -8.71866500 | 1.64707400  | 0.00108700  |
| H | -7.29645200 | 2.22267500  | 0.88828800  |
| C | 7.07047700  | -0.26973700 | 0.00019700  |
| C | 7.62508300  | -1.67888800 | -0.00005600 |
| H | 7.37926000  | 0.29678500  | 0.88238900  |
| H | 7.37940200  | 0.29715300  | -0.88170400 |
| H | 7.29488000  | -2.22469200 | -0.88665600 |
| H | 8.71763000  | -1.64919000 | -0.00000700 |
| H | 7.29480900  | -2.22505300 | 0.88629400  |
| O | 5.62635600  | -0.37796400 | 0.00006600  |
| O | -5.62644900 | 0.37706200  | -0.00018700 |

The geometric structure coordinates of TS\* of N\*-T1\* path under  $E_x = +1 \times 10^{-4}$  a.u.

|   |            |             |             |
|---|------------|-------------|-------------|
| C | 0.69844800 | 0.24796200  | 0.00002200  |
| C | 2.86278400 | -0.67792300 | -0.00016700 |
| C | 3.45908600 | 0.60074400  | 0.00013000  |
| C | 2.62485400 | 1.73306100  | 0.00036000  |

|   |             |             |             |
|---|-------------|-------------|-------------|
| C | 1.24000000  | 1.57330700  | 0.00031000  |
| C | -0.70471400 | -0.04425600 | 0.00002700  |
| C | -1.17854700 | -1.42939600 | -0.00014800 |
| C | -2.55979200 | -1.65924200 | -0.00016300 |
| C | -3.43753900 | -0.56702300 | 0.00001400  |
| C | -2.89416200 | 0.73220100  | 0.00020900  |
| H | 3.47076800  | -1.57272500 | -0.00037400 |
| H | 3.05395400  | 2.72600300  | 0.00057300  |
| H | -2.93787400 | -2.67300500 | -0.00029100 |
| H | -3.55137300 | 1.59227400  | 0.00037200  |
| O | -0.31280800 | -2.40452000 | -0.00026700 |
| H | 0.73129400  | -1.88144300 | -0.00037000 |
| O | 0.45229600  | 2.64620000  | 0.00053700  |
| H | -0.49317800 | 2.32089500  | 0.00045200  |
| N | 1.55340200  | -0.83503900 | -0.00022900 |
| N | -1.58130100 | 0.98510000  | 0.00021100  |
| C | -4.89424500 | -0.81518000 | 0.00001000  |
| C | 4.91954500  | 0.78529600  | 0.00017900  |
| O | 5.47357000  | 1.86529700  | 0.00042700  |
| O | -5.39456500 | -1.91885800 | -0.00014100 |
| C | -7.05064800 | 0.18317700  | 0.00021300  |
| C | -7.64662200 | 1.57530200  | 0.00045800  |
| H | -7.34286300 | -0.39273600 | 0.88206100  |
| H | -7.34291400 | -0.39244600 | -0.88180800 |
| H | -7.33236800 | 2.13089200  | -0.88582100 |
| H | -8.73780200 | 1.51338000  | 0.00048200  |
| H | -7.33231200 | 2.13060200  | 0.88689800  |
| C | 7.02982000  | -0.30821000 | -0.00005600 |
| C | 7.56707800  | -1.72447400 | -0.00037700 |
| H | 7.34827300  | 0.25417600  | 0.88173800  |

|   |             |             |             |
|---|-------------|-------------|-------------|
| H | 7.34828200  | 0.25457900  | -0.88159000 |
| H | 7.22901900  | -2.26597000 | -0.88672100 |
| H | 8.66001700  | -1.70952300 | -0.00037200 |
| H | 7.22901700  | -2.26637300 | 0.88571900  |
| O | 5.58709500  | -0.39811800 | -0.00008400 |
| O | -5.61060000 | 0.33403500  | 0.00019500  |

The geometric structure coordinates of TS\* of T1\*-T3\* path under  $E_x = +1 \times 10^{-4}$  a.u.

|   |             |             |             |
|---|-------------|-------------|-------------|
| C | 0.69449980  | 0.06814377  | -0.00062381 |
| C | 2.94627880  | -0.73661023 | -0.00180581 |
| C | 3.44656180  | 0.56820977  | -0.00144481 |
| C | 2.55405580  | 1.65206877  | -0.00066381 |
| C | 1.16129880  | 1.43607777  | -0.00027781 |
| C | -0.69621320 | -0.24870923 | 0.00002819  |
| C | -1.22756820 | -1.61198123 | -0.00008681 |
| C | -2.64005520 | -1.72986823 | 0.00067119  |
| C | -3.45909620 | -0.58903023 | 0.00149619  |
| C | -2.86693520 | 0.67745277  | 0.00151419  |
| H | 3.58726680  | -1.60525223 | -0.00243481 |
| H | 2.93270580  | 2.66532277  | -0.00041081 |
| H | -3.08247020 | -2.71723023 | 0.00067519  |
| H | -3.45794920 | 1.58221877  | 0.00213319  |
| O | -0.43154920 | -2.60369423 | -0.00087481 |
| H | 1.19441780  | -1.88822223 | -0.00156781 |
| O | 0.30472280  | 2.40670177  | 0.00037719  |
| H | -0.79516920 | 1.83166877  | 0.00068619  |
| N | 1.62991580  | -0.94519823 | -0.00139681 |
| N | -1.53306920 | 0.82417577  | 0.00076719  |
| C | -4.93067720 | -0.75612923 | 0.00234519  |
| C | 4.90417380  | 0.83048177  | -0.00190281 |

|   |             |             |             |
|---|-------------|-------------|-------------|
| O | 5.39456680  | 1.93670377  | -0.00162081 |
| O | -5.49266020 | -1.82801923 | 0.00239619  |
| C | -7.02842120 | 0.36075877  | 0.00389219  |
| C | -7.54621720 | 1.78391377  | 0.00375319  |
| H | -7.35196120 | -0.19737723 | 0.88619619  |
| H | -7.35295520 | -0.19793523 | -0.87768581 |
| H | -7.20215820 | 2.32075077  | -0.88304681 |
| H | -8.63917320 | 1.78289577  | 0.00453319  |
| H | -7.20089920 | 2.32138277  | 0.88968019  |
| C | 7.06842480  | -0.15280723 | -0.00316381 |
| C | 7.67432780  | -1.54058923 | -0.00392581 |
| H | 7.35627380  | 0.42457477  | 0.87904219  |
| H | 7.35559280  | 0.42524377  | -0.88515281 |
| H | 7.36421780  | -2.09800223 | -0.89054881 |
| H | 8.76500480  | -1.47056723 | -0.00433281 |
| H | 7.36492180  | -2.09866823 | 0.88252519  |
| O | 5.62891480  | -0.31392423 | -0.00266981 |
| O | -5.58240320 | 0.43154377  | 0.00307119  |

The geometric structure coordinates of TS\* of N\*-T2\* path under  $E_x = +1 \times 10^{-4}$  a.u.

|   |             |             |             |
|---|-------------|-------------|-------------|
| C | 0.71374374  | 0.06479637  | 0.00002333  |
| C | 2.90282774  | -0.71264763 | -0.00017267 |
| C | 3.44693774  | 0.58714137  | 0.00006133  |
| C | 2.56922774  | 1.67956437  | 0.00027433  |
| C | 1.18788974  | 1.44976437  | 0.00025133  |
| C | -0.68830126 | -0.22718863 | 0.00001333  |
| C | -1.22987226 | -1.55315663 | -0.00026667 |
| C | -2.61455226 | -1.71312863 | -0.00030267 |
| C | -3.44878826 | -0.58123163 | -0.00006367 |
| C | -2.85334126 | 0.69746937  | 0.00021733  |

|   |             |             |             |
|---|-------------|-------------|-------------|
| H | 3.56027474  | -1.57258763 | -0.00035667 |
| H | 2.94717974  | 2.69334637  | 0.00044133  |
| H | -3.04364626 | -2.70610563 | -0.00051067 |
| H | -3.46184526 | 1.59192537  | 0.00042033  |
| O | -0.44168326 | -2.62549063 | -0.00049867 |
| H | 0.50365774  | -2.29950963 | -0.00043067 |
| O | 0.32238474  | 2.42498437  | 0.00042533  |
| H | -0.72192426 | 1.90179437  | 0.00040033  |
| N | 1.59107174  | -0.96549063 | -0.00018767 |
| N | -1.54368326 | 0.85539637  | 0.00026033  |
| C | -4.90994326 | -0.76691963 | -0.00009967 |
| C | 4.90292074  | 0.83414537  | 0.00007833  |
| O | 5.40552374  | 1.93713637  | 0.00026733  |
| O | -5.46171426 | -1.84769563 | -0.00033567 |
| C | -7.02116726 | 0.32494537  | 0.00013933  |
| C | -7.55886026 | 1.74089237  | 0.00045033  |
| H | -7.33883126 | -0.23806763 | 0.88172433  |
| H | -7.33883226 | -0.23767963 | -0.88169467 |
| H | -7.22133826 | 2.28295037  | -0.88573767 |
| H | -8.65173426 | 1.72518037  | 0.00044633  |
| H | -7.22134026 | 2.28256037  | 0.88687833  |
| C | 7.05852774  | -0.16563763 | -0.00013967 |
| C | 7.65432274  | -1.55798763 | -0.00039267 |
| H | 7.35148974  | 0.40984637  | 0.88183433  |
| H | 7.35146074  | 0.41015537  | -0.88192167 |
| H | 7.33960874  | -2.11319363 | -0.88676367 |
| H | 8.74558774  | -1.49657763 | -0.00039967 |
| H | 7.33963774  | -2.11350363 | 0.88579533  |
| O | 5.61922274  | -0.31625463 | -0.00014167 |
| O | -5.57771026 | 0.41526637  | 0.00015833  |

The geometric structure coordinates of TS\* of T2\*-T3\* path under  $E_x = +1 \times 10^{-4}$  a.u.

|   |             |             |             |
|---|-------------|-------------|-------------|
| C | 0.69586268  | 0.25067860  | -0.00058256 |
| C | 2.86650968  | -0.67632440 | -0.00082756 |
| C | 3.45966368  | 0.59017960  | -0.00216256 |
| C | 2.64077968  | 1.73126060  | -0.00275656 |
| C | 1.22813968  | 1.61368060  | -0.00205156 |
| C | -0.69424032 | -0.06618540 | 0.00041544  |
| C | -1.16090332 | -1.43452640 | 0.00169144  |
| C | -2.55354532 | -1.65078340 | 0.00250844  |
| C | -3.44628632 | -0.56746340 | 0.00211744  |
| C | -2.94685432 | 0.73736260  | 0.00091744  |
| H | 3.45723468  | -1.58130140 | -0.00037856 |
| H | 3.08310968  | 2.71863760  | -0.00384056 |
| H | -2.93199332 | -2.66413340 | 0.00346944  |
| H | -3.58834732 | 1.60565160  | 0.00058844  |
| O | -0.30433132 | -2.40506940 | 0.00204144  |
| H | 0.79601268  | -1.82963340 | 0.00109444  |
| O | 0.43284368  | 2.60578360  | -0.00262356 |
| H | -1.19622832 | 1.88997760  | -0.00090156 |
| N | 1.53326768  | -0.82269340 | -0.00006256 |
| N | -1.63023932 | 0.94671060  | 0.00016344  |
| C | -4.90435132 | -0.83111040 | 0.00302244  |
| C | 4.93063168  | 0.75576960  | -0.00299956 |
| O | 5.49495168  | 1.82670360  | -0.00420056 |
| O | -5.39248132 | -1.93807940 | 0.00407444  |
| C | -7.06963932 | 0.15022260  | 0.00334844  |
| C | -7.67626232 | 1.53755760  | 0.00289644  |
| H | -7.35585632 | -0.42723840 | 0.88595344  |
| H | -7.35675132 | -0.42819640 | -0.87834056 |



|   |             |             |             |
|---|-------------|-------------|-------------|
| H | -7.36756832 | 2.09502160  | -0.88417856 |
| H | -8.76683432 | 1.46663060  | 0.00349644  |
| H | -7.36665532 | 2.09599260  | 0.88904144  |
| C | 7.02714868  | -0.36323440 | -0.00302156 |
| C | 7.54407068  | -1.78683640 | -0.00226156 |
| H | 7.35250168  | 0.19549760  | 0.87831744  |
| H | 7.35163768  | 0.19424860  | -0.88546856 |
| H | 7.19838568  | -2.32432940 | -0.88804156 |
| H | 8.63707668  | -1.78682840 | -0.00270856 |
| H | 7.19911368  | -2.32311440 | 0.88453844  |
| O | 5.58178268  | -0.43317340 | -0.00226056 |
| O | -5.62951532 | 0.31208460  | 0.00252344  |

The geometric structure coordinates of N under  $E_x = +5 \times 10^{-4}$  a.u.

|   |             |             |             |
|---|-------------|-------------|-------------|
| C | 0.72032800  | 0.15194100  | 0.00015200  |
| C | 2.88173100  | -0.71551000 | 0.00006100  |
| C | 3.44564400  | 0.56516900  | 0.00020400  |
| C | 2.60016300  | 1.66782200  | 0.00031800  |
| C | 1.21604500  | 1.48714800  | 0.00029500  |
| C | -0.71905400 | -0.15195300 | 0.00008100  |
| C | -1.21548700 | -1.48581700 | 0.00000700  |
| C | -2.60006200 | -1.66564100 | -0.00010700 |
| C | -3.44406600 | -0.56305200 | -0.00013700 |
| C | -2.87948700 | 0.71785500  | -0.00005100 |
| H | 3.50592100  | -1.59912300 | -0.00003500 |
| H | 3.00714000  | 2.67096500  | 0.00042900  |
| H | -3.00878400 | -2.66812900 | -0.00016300 |
| H | -3.50394700 | 1.60126100  | -0.00007300 |
| O | -0.42835000 | -2.56459700 | 0.00006400  |
| H | 0.51068000  | -2.23120100 | 0.00020800  |

|   |             |             |             |
|---|-------------|-------------|-------------|
| O | 0.42763500  | 2.56404500  | 0.00041900  |
| H | -0.51213200 | 2.22814800  | 0.00041000  |
| N | 1.56771000  | -0.90008800 | 0.00003500  |
| N | -1.56551500 | 0.90149600  | 0.00005100  |
| C | -4.91892100 | -0.79444700 | -0.00025500 |
| C | 4.91854100  | 0.79524500  | 0.00023500  |
| O | 5.43579200  | 1.88676400  | 0.00029900  |
| O | -5.42999100 | -1.88845800 | -0.00020600 |
| C | -7.05720100 | 0.23807900  | -0.00011800 |
| C | -7.62327200 | 1.64200200  | 0.00076900  |
| H | -7.35780800 | -0.33235200 | 0.88193000  |
| H | -7.35798400 | -0.33128000 | -0.88280700 |
| H | -7.29806500 | 2.19119200  | -0.88538500 |
| H | -8.71532800 | 1.60174300  | 0.00079700  |
| H | -7.29797300 | 2.19010200  | 0.88756300  |
| C | 7.05512900  | -0.23888500 | -0.00002200 |
| C | 7.62139600  | -1.64325300 | -0.00055800 |
| H | 7.35771300  | 0.33044300  | 0.88236400  |
| H | 7.35757200  | 0.33107100  | -0.88204700 |
| H | 7.29476800  | -2.19139700 | -0.88686100 |
| H | 8.71369700  | -1.60422900 | -0.00064300 |
| H | 7.29492700  | -2.19202000 | 0.88541700  |
| O | 5.61128700  | -0.36091600 | 0.00006300  |
| O | -5.61055200 | 0.35945100  | -0.00021000 |

The geometric structure coordinates of N\* under  $E_x = +5 \times 10^{-4}$  a.u.

|   |            |             |             |
|---|------------|-------------|-------------|
| C | 0.69944600 | 0.15062800  | 0.00011800  |
| C | 2.87455700 | -0.70238100 | 0.00006600  |
| C | 3.45492100 | 0.58996200  | -0.00002700 |
| C | 2.60087300 | 1.70085500  | -0.00004600 |

|   |             |             |             |
|---|-------------|-------------|-------------|
| C | 1.21977300  | 1.50400100  | 0.00002800  |
| C | -0.69763500 | -0.13447600 | 0.00017900  |
| C | -1.21587000 | -1.49246300 | 0.00025900  |
| C | -2.59614000 | -1.69231000 | 0.00030500  |
| C | -3.45134100 | -0.58437700 | 0.00027700  |
| C | -2.87590500 | 0.70746700  | 0.00019500  |
| H | 3.51166600  | -1.57794800 | 0.00008500  |
| H | 3.00211400  | 2.70547500  | -0.00011000 |
| H | -2.99605400 | -2.69763600 | 0.00036200  |
| H | -3.51525200 | 1.58134400  | 0.00016800  |
| O | -0.40072700 | -2.53398500 | 0.00029100  |
| H | 0.55076300  | -2.16178200 | 0.00025500  |
| O | 0.40925000  | 2.55091100  | 0.00002800  |
| H | -0.54099400 | 2.18672200  | 0.00012800  |
| N | 1.57164400  | -0.91154300 | 0.00013600  |
| N | -1.56985900 | 0.92188400  | 0.00014900  |
| C | -4.91082700 | -0.80306200 | 0.00033100  |
| C | 4.91103900  | 0.80154400  | -0.00010000 |
| O | 5.44670400  | 1.89120300  | -0.00022800 |
| O | -5.43372600 | -1.89700800 | 0.00034400  |
| C | -7.04619300 | 0.24050900  | 0.00019900  |
| C | -7.61363200 | 1.64437900  | 0.00020600  |
| H | -7.35001200 | -0.32937200 | 0.88206100  |
| H | -7.34998900 | -0.32934700 | -0.88169000 |
| H | -7.28840900 | 2.19336700  | -0.88624700 |
| H | -8.70577600 | 1.60447800  | 0.00018500  |
| H | -7.28844200 | 2.19334200  | 0.88668700  |
| C | 7.04083500  | -0.25219400 | -0.00026300 |
| C | 7.60504100  | -1.65812900 | -0.00032700 |
| H | 7.34930900  | 0.31639700  | 0.88128600  |

|   |             |             |             |
|---|-------------|-------------|-------------|
| H | 7.34914100  | 0.31641200  | -0.88186100 |
| H | 7.27672300  | -2.20606100 | -0.88636700 |
| H | 8.69761300  | -1.62274700 | -0.00042800 |
| H | 7.27688700  | -2.20607700 | 0.88576400  |
| O | 5.60122900  | -0.36966500 | -0.00012500 |
| O | -5.60290500 | 0.36127700  | 0.00021700  |

The geometric structure coordinates of T1\* under  $E_x = +5 \times 10^{-4}$  a.u.

|   |             |             |             |
|---|-------------|-------------|-------------|
| C | 0.67353900  | 0.16661500  | 0.11803100  |
| C | 2.91412400  | -0.71972600 | 0.13826600  |
| C | 3.45095700  | 0.54153100  | -0.02946800 |
| C | 2.58515300  | 1.65773700  | -0.10672400 |
| C | 1.20641500  | 1.47689700  | -0.02652600 |
| C | -0.74563200 | -0.13124700 | 0.01758200  |
| C | -1.23593200 | -1.50761400 | -0.14952200 |
| C | -2.62704900 | -1.67303400 | -0.12511300 |
| C | -3.48545500 | -0.56345200 | -0.03835800 |
| C | -2.93136400 | 0.70703000  | 0.05465100  |
| H | 3.52052400  | -1.60849800 | 0.22342200  |
| H | 2.99121000  | 2.65451100  | -0.20380500 |
| H | -3.03671200 | -2.66437600 | -0.26407200 |
| H | -3.54729100 | 1.59568200  | 0.05627700  |
| O | -0.39798500 | -2.47229700 | -0.26057900 |
| H | 1.16508200  | -1.80974500 | 0.25019400  |
| O | 0.41160600  | 2.54643500  | -0.08337600 |
| H | -0.52343500 | 2.22899200  | 0.03397900  |
| N | 1.58395100  | -0.87251100 | 0.24810700  |
| N | -1.60473400 | 0.88299200  | 0.13148100  |
| C | -4.95109900 | -0.79064600 | -0.08622500 |
| C | 4.91433200  | 0.75719100  | -0.09176500 |

|   |             |             |             |
|---|-------------|-------------|-------------|
| O | 5.43408900  | 1.84045300  | -0.23233600 |
| O | -5.46455000 | -1.87915700 | -0.20849300 |
| C | -7.09321400 | 0.23264400  | -0.01600600 |
| C | -7.66837700 | 1.62684000  | 0.11831000  |
| H | -7.40830000 | -0.42571200 | 0.79734300  |
| H | -7.37754800 | -0.24438200 | -0.95724000 |
| H | -7.33195600 | 2.26504900  | -0.70168800 |
| H | -8.76014200 | 1.58279400  | 0.09609900  |
| H | -7.36024500 | 2.08315700  | 1.06152100  |
| C | 7.05132400  | -0.28003100 | -0.04692100 |
| C | 7.62228000  | -1.67545800 | 0.09617500  |
| H | 7.38479700  | 0.38749900  | 0.75170700  |
| H | 7.32275100  | 0.18236300  | -0.99936000 |
| H | 7.26683600  | -2.32319600 | -0.70821300 |
| H | 8.71377500  | -1.63791900 | 0.05279200  |
| H | 7.32969700  | -2.11703500 | 1.05136300  |
| O | 5.61031500  | -0.39932700 | 0.01813900  |
| O | -5.65004000 | 0.35971400  | 0.02284000  |

The geometric structure coordinates of T2\* under  $E_x = +5 \times 10^{-4}$  a.u.

|   |             |             |             |
|---|-------------|-------------|-------------|
| C | 0.74620200  | 0.14729000  | 0.02856200  |
| C | 2.93077500  | -0.69707100 | 0.06267900  |
| C | 3.49145200  | 0.57180200  | -0.02680800 |
| C | 2.63498400  | 1.68540400  | -0.10622300 |
| C | 1.24464600  | 1.52311100  | -0.12941600 |
| C | -0.67027000 | -0.14897000 | 0.12636500  |
| C | -1.20145000 | -1.46294400 | -0.01255500 |
| C | -2.57847400 | -1.64613500 | -0.09733200 |
| C | -3.44793900 | -0.53368800 | -0.02752200 |
| C | -2.91618100 | 0.72920500  | 0.13860100  |

|   |             |             |             |
|---|-------------|-------------|-------------|
| H | 3.54377200  | -1.58793100 | 0.06079200  |
| H | 3.04621500  | 2.67664700  | -0.24022000 |
| H | -2.98209200 | -2.64410500 | -0.19410400 |
| H | -3.52601400 | 1.61592800  | 0.22128800  |
| O | -0.40531300 | -2.53185900 | -0.06379800 |
| H | 0.52941200  | -2.21164900 | 0.04920100  |
| O | 0.40868800  | 2.49063500  | -0.23109400 |
| H | -1.17439400 | 1.82533000  | 0.26192300  |
| N | 1.60579400  | -0.87058400 | 0.13780400  |
| N | -1.58576500 | 0.88665900  | 0.25044200  |
| C | -4.91236500 | -0.75812000 | -0.09455000 |
| C | 4.95428100  | 0.79001900  | -0.07793600 |
| O | 5.48022900  | 1.87455700  | -0.19201200 |
| O | -5.41990300 | -1.84673700 | -0.23231900 |
| C | -7.05604100 | 0.26733000  | -0.05838300 |
| C | -7.63306800 | 1.66013100  | 0.08009400  |
| H | -7.38550000 | -0.39983100 | 0.74181800  |
| H | -7.32180600 | -0.19910800 | -1.01012200 |
| H | -7.28060800 | 2.30751700  | -0.72585600 |
| H | -8.72404400 | 1.61640000  | 0.03509600  |
| H | -7.34521800 | 2.10563400  | 1.03486200  |
| C | 7.08987700  | -0.24671800 | -0.02498300 |
| C | 7.65951800  | -1.64530900 | 0.09289200  |
| H | 7.41380400  | 0.40160300  | 0.79336900  |
| H | 7.37501100  | 0.23811300  | -0.96233600 |
| H | 7.31529400  | -2.27345600 | -0.73167300 |
| H | 8.75166200  | -1.60739600 | 0.06652800  |
| H | 7.35193300  | -2.10960600 | 1.03243000  |
| O | 5.64970300  | -0.36813400 | 0.01850700  |
| O | -5.61248300 | 0.39267500  | 0.00847400  |

The geometric structure coordinates of T3\* in under  $E_x = +5 \times 10^{-4}$  a.u.

|   |             |             |             |
|---|-------------|-------------|-------------|
| C | 0.68740600  | 0.16876300  | 0.00040400  |
| C | 2.92369100  | -0.70141000 | 0.00018200  |
| C | 3.47009800  | 0.58447900  | 0.00021500  |
| C | 2.61489900  | 1.69374700  | 0.00048900  |
| C | 1.20049700  | 1.54319400  | 0.00060000  |
| C | -0.68625500 | -0.16248800 | 0.00048800  |
| C | -1.19825100 | -1.53747100 | 0.00040600  |
| C | -2.61253500 | -1.68751500 | 0.00026400  |
| C | -3.46715800 | -0.57917700 | 0.00040300  |
| C | -2.92303000 | 0.70646600  | 0.00071500  |
| H | 3.53202200  | -1.59329800 | -0.00014200 |
| H | 3.02480300  | 2.69495400  | 0.00054500  |
| H | -3.02349400 | -2.68838500 | 0.00013000  |
| H | -3.53232100 | 1.59776100  | 0.00090200  |
| O | -0.40027000 | -2.52164300 | 0.00063900  |
| H | 1.12964100  | -1.80368600 | 0.00039100  |
| O | 0.40254100  | 2.52718700  | 0.00067700  |
| H | -1.12732300 | 1.80917400  | 0.00110900  |
| N | 1.59757500  | -0.86820700 | 0.00022300  |
| N | -1.59539300 | 0.87393000  | 0.00084300  |
| C | -4.93553900 | -0.79170500 | 0.00037400  |
| C | 4.93583200  | 0.79208500  | -0.00002400 |
| O | 5.47112100  | 1.87715000  | -0.00014200 |
| O | -5.46130100 | -1.88027900 | 0.00041300  |
| C | -7.06519600 | 0.26551200  | 0.00030900  |
| C | -7.62182200 | 1.67351300  | -0.00082400 |
| H | -7.37183000 | -0.30112900 | 0.88295300  |
| H | -7.37185900 | -0.30261200 | -0.88137400 |

|   |             |             |             |
|---|-------------|-------------|-------------|
| H | -7.29335800 | 2.21929600  | -0.88805300 |
| H | -8.71416900 | 1.64133700  | -0.00064900 |
| H | -7.29311400 | 2.22092500  | 0.88531700  |
| C | 7.06148200  | -0.27160900 | -0.00046300 |
| C | 7.61633300  | -1.68094400 | -0.00096000 |
| H | 7.37162300  | 0.29472300  | 0.88154600  |
| H | 7.37116600  | 0.29516600  | -0.88234600 |
| H | 7.28525100  | -2.22669100 | -0.88728500 |
| H | 8.70899300  | -1.65174300 | -0.00133100 |
| H | 7.28587500  | -2.22707500 | 0.88536400  |
| O | 5.61882500  | -0.38008600 | -0.00012300 |
| O | -5.61927500 | 0.37560400  | 0.00030200  |

The geometric structure coordinates of TS\* of N\*-T1\* path under  $E_x = +5 \times 10^{-4}$  a.u.

|   |             |             |             |
|---|-------------|-------------|-------------|
| C | 0.69052149  | 0.23232580  | -0.00002768 |
| C | 2.85290549  | -0.69727220 | -0.00009268 |
| C | 3.45167949  | 0.58098180  | -0.00013268 |
| C | 2.61802549  | 1.71452180  | -0.00011768 |
| C | 1.23275249  | 1.55594480  | -0.00006568 |
| C | -0.71530051 | -0.05963520 | 0.00002732  |
| C | -1.18910151 | -1.44483620 | 0.00006432  |
| C | -2.57028951 | -1.67407820 | 0.00011832  |
| C | -3.44757851 | -0.58184720 | 0.00013432  |
| C | -2.90494351 | 0.71593780  | 0.00009532  |
| H | 3.45922349  | -1.59317820 | -0.00010268 |
| H | 3.04766549  | 2.70716880  | -0.00014668 |
| H | -2.94917251 | -2.68760720 | 0.00014632  |
| H | -3.56121251 | 1.57664480  | 0.00010632  |
| O | -0.32338951 | -2.42017020 | 0.00004732  |
| H | 0.72006849  | -1.89768220 | 0.00000232  |



|   |             |             |             |
|---|-------------|-------------|-------------|
| O | 0.44679949  | 2.63068380  | -0.00005168 |
| H | -0.49847251 | 2.30792980  | -0.00001368 |
| N | 1.54397149  | -0.85186720 | -0.00004368 |
| N | -1.58970151 | 0.96824280  | 0.00004432  |
| C | -4.90583151 | -0.83178620 | 0.00019032  |
| C | 4.91083849  | 0.76247180  | -0.00018868 |
| O | 5.47000049  | 1.84061280  | -0.00022268 |
| O | -5.40189751 | -1.93672120 | 0.00022532  |
| C | -7.06361251 | 0.16409780  | 0.00025332  |
| C | -7.65989351 | 1.55579180  | 0.00025632  |
| H | -7.35442351 | -0.41190020 | 0.88233432  |
| H | -7.35448751 | -0.41192520 | -0.88178968 |
| H | -7.34646651 | 2.11139280  | -0.88627968 |
| H | -8.75091751 | 1.49283480  | 0.00029632  |
| H | -7.34640251 | 2.11141780  | 0.88675332  |
| C | 7.01854649  | -0.33558820 | -0.00025368 |
| C | 7.55415649  | -1.75276520 | -0.00025868 |
| H | 7.33896849  | 0.22639680  | 0.88127232  |
| H | 7.33890249  | 0.22637880  | -0.88181468 |
| H | 7.21478649  | -2.29395920 | -0.88631068 |
| H | 8.64723349  | -1.73982420 | -0.00029968 |
| H | 7.21485249  | -2.29394120 | 0.88583032  |
| O | 5.57724749  | -0.42382620 | -0.00019868 |
| O | -5.62201851 | 0.31526780  | 0.00019932  |

The geometric structure coordinates of TS\* of T1\*-T3\* path under  $E_x = +5 \times 10^{-4}$  a.u.

|   |            |             |             |
|---|------------|-------------|-------------|
| C | 0.69511884 | 0.07140556  | -0.00000874 |
| C | 2.94461184 | -0.73742944 | 0.00120326  |
| C | 3.44757384 | 0.56702356  | -0.00038574 |
| C | 2.55633384 | 1.65258556  | -0.00182074 |

|   |             |             |             |
|---|-------------|-------------|-------------|
| C | 1.16316284  | 1.43821456  | -0.00167574 |
| C | -0.69712016 | -0.24436244 | 0.00025226  |
| C | -1.22770316 | -1.60769444 | 0.00189826  |
| C | -2.64000016 | -1.72505844 | 0.00191226  |
| C | -3.45846016 | -0.58406244 | 0.00041426  |
| C | -2.86723316 | 0.68191656  | -0.00110574 |
| H | 3.58391184  | -1.60726844 | 0.00234926  |
| H | 2.93615484  | 2.66536356  | -0.00305074 |
| H | -3.08338416 | -2.71203344 | 0.00309526  |
| H | -3.45807016 | 1.58675356  | -0.00229074 |
| O | -0.43101516 | -2.59924044 | 0.00320526  |
| H | 1.18955684  | -1.88568744 | 0.00248026  |
| O | 0.30733184  | 2.40956756  | -0.00296674 |
| H | -0.79204316 | 1.83608756  | -0.00234874 |
| N | 1.62857884  | -0.94346044 | 0.00134626  |
| N | -1.53201016 | 0.82820356  | -0.00115974 |
| C | -4.93138616 | -0.75300944 | 0.00048026  |
| C | 4.90446484  | 0.82550056  | -0.00057874 |
| O | 5.40019384  | 1.92987356  | -0.00190574 |
| O | -5.48955116 | -1.82637344 | 0.00175726  |
| C | -7.03070916 | 0.36132656  | -0.00111274 |
| C | -7.54914916 | 1.78398856  | -0.00290074 |
| H | -7.35351016 | -0.19637044 | 0.88157426  |
| H | -7.35333416 | -0.19852444 | -0.88250074 |
| H | -7.20522416 | 2.32032856  | -0.89003374 |
| H | -8.64201216 | 1.78179656  | -0.00300874 |
| H | -7.20540316 | 2.32249156  | 0.88299026  |
| C | 7.06592684  | -0.16329744 | 0.00083526  |
| C | 7.66939784  | -1.55240244 | 0.00257226  |
| H | 7.35546784  | 0.41483356  | 0.88215726  |

|   |             |             |             |
|---|-------------|-------------|-------------|
| H | 7.35561584  | 0.41269256  | -0.88183874 |
| H | 7.35810484  | -2.11059444 | -0.88316874 |
| H | 8.76033484  | -1.48496544 | 0.00258126  |
| H | 7.35795784  | -2.10844344 | 0.88961226  |
| O | 5.62752584  | -0.32188644 | 0.00090726  |
| O | -5.58332816 | 0.43266956  | -0.00105674 |

The geometric structure coordinates of TS\* of N\*-T2\* path under  $E_x = +5 \times 10^{-4}$  a.u.

|   |             |             |             |
|---|-------------|-------------|-------------|
| C | 0.71296688  | 0.06751093  | -0.00003025 |
| C | 2.90073388  | -0.71371407 | -0.00008325 |
| C | 3.44725188  | 0.58681493  | -0.00016325 |
| C | 2.57041888  | 1.68033993  | -0.00017725 |
| C | 1.18870788  | 1.45157293  | -0.00011025 |
| C | -0.68721912 | -0.22293107 | 0.00003875  |
| C | -1.22970512 | -1.54986507 | 0.00011875  |
| C | -2.61420412 | -1.70920507 | 0.00018075  |
| C | -3.44756812 | -0.57751207 | 0.00016375  |
| C | -2.85284712 | 0.70083293  | 0.00008275  |
| H | 3.55796788  | -1.57390007 | -0.00007125 |
| H | 2.94886088  | 2.69387593  | -0.00023725 |
| H | -3.04407212 | -2.70191907 | 0.00024175  |
| H | -3.46172712 | 1.59504893  | 0.00006675  |
| O | -0.44106812 | -2.62136307 | 0.00013575  |
| H | 0.50467188  | -2.29413407 | 0.00008275  |
| O | 0.32419388  | 2.42769293  | -0.00011925 |
| H | -0.72101212 | 1.90546393  | -0.00005425 |
| N | 1.59094388  | -0.96537907 | -0.00001925 |
| N | -1.54242612 | 0.85939993  | 0.00002475  |
| C | -4.91026812 | -0.76445507 | 0.00022875  |
| C | 4.90198888  | 0.83032493  | -0.00023225 |

|   |             |             |             |
|---|-------------|-------------|-------------|
| O | 5.41015288  | 1.93149093  | -0.00030125 |
| O | -5.45826712 | -1.84642407 | 0.00029975  |
| C | -7.02269512 | 0.32553793  | 0.00026275  |
| C | -7.56035112 | 1.74120993  | 0.00021975  |
| H | -7.33908912 | -0.23747307 | 0.88212775  |
| H | -7.33915812 | -0.23755207 | -0.88152725 |
| H | -7.22353212 | 2.28314593  | -0.88628525 |
| H | -8.65311412 | 1.72475393  | 0.00026275  |
| H | -7.22346212 | 2.28322693  | 0.88664875  |
| C | 7.05506488  | -0.17448307 | -0.00027425 |
| C | 7.64899688  | -1.56792907 | -0.00023625 |
| H | 7.35010188  | 0.40062093  | 0.88144275  |
| H | 7.35003088  | 0.40054193  | -0.88206725 |
| H | 7.33282988  | -2.12280907 | -0.88632325 |
| H | 8.74049388  | -1.50875707 | -0.00028325 |
| H | 7.33290188  | -2.12273007 | 0.88592675  |
| O | 5.61712088  | -0.32314707 | -0.00021025 |
| O | -5.57768712 | 0.41575893  | 0.00020175  |

The geometric structure coordinates of TS\* of T2\*-T3\* path under  $E_x = +5 \times 10^{-4}$  a.u.

|   |             |             |             |
|---|-------------|-------------|-------------|
| C | 0.69542983  | 0.25389672  | 0.00111320  |
| C | 2.86499883  | -0.67670028 | -0.00206380 |
| C | 3.46130883  | 0.58932972  | 0.00273520  |
| C | 2.64374183  | 1.73160172  | 0.00688820  |
| C | 1.23069683  | 1.61584072  | 0.00626220  |
| C | -0.69381317 | -0.06171828 | -0.00025280 |
| C | -1.16143017 | -1.43037828 | -0.00546380 |
| C | -2.55402617 | -1.64589228 | -0.00651080 |
| C | -3.44625617 | -0.56284528 | -0.00260080 |
| C | -2.94722917 | 0.74154972  | 0.00238620  |

|   |             |             |             |
|---|-------------|-------------|-------------|
| H | 3.45436283  | -1.58260328 | -0.00537280 |
| H | 3.08677083  | 2.71861572  | 0.01061620  |
| H | -2.93302317 | -2.65907528 | -0.01036980 |
| H | -3.58889417 | 1.60974872  | 0.00554420  |
| O | -0.30564817 | -2.40153528 | -0.00895980 |
| H | 0.79577983  | -1.82641028 | -0.00663780 |
| O | 0.43767783  | 2.60941972  | 0.00985820  |
| H | -1.19771017 | 1.89445672  | 0.00699620  |
| N | 1.53287783  | -0.82120828 | -0.00277480 |
| N | -1.62993417 | 0.95111972  | 0.00340520  |
| C | -4.90544317 | -0.82789328 | -0.00384180 |
| C | 4.93118083  | 0.75060972  | 0.00351120  |
| O | 5.50112283  | 1.81913372  | 0.00755020  |
| O | -5.39009317 | -1.93590828 | -0.00805280 |
| C | -7.07189517 | 0.15157172  | -0.00057780 |
| C | -7.67868617 | 1.53856072  | 0.00437320  |
| H | -7.35757617 | -0.42976728 | 0.87950120  |
| H | -7.35725117 | -0.42332628 | -0.88498280 |
| H | -7.37007717 | 2.09986572  | -0.88028480 |
| H | -8.76911717 | 1.46682572  | 0.00390820  |
| H | -7.37040917 | 2.09339372  | 0.89321920  |
| C | 7.02426283  | -0.37446928 | -0.00043580 |
| C | 7.53821883  | -1.79939528 | -0.00559080 |
| H | 7.35133683  | 0.17951172  | 0.88343220  |
| H | 7.35153383  | 0.18596372  | -0.88015280 |
| H | 7.19127883  | -2.33220328 | -0.89372680 |
| H | 8.63132283  | -1.80233628 | -0.00548280 |
| H | 7.19108483  | -2.33868328 | 0.87854920  |
| O | 5.58014083  | -0.44147228 | -0.00084480 |
| O | -5.63039317 | 0.31358872  | 0.00027920  |

The geometric structure coordinates of N under  $E_x = +1 \times 10^{-3}$  a.u.

|   |             |             |             |
|---|-------------|-------------|-------------|
| C | 0.72098400  | 0.15196700  | -0.00008700 |
| C | 2.88290300  | -0.71430500 | -0.00006700 |
| C | 3.44650800  | 0.56626800  | 0.00009200  |
| C | 2.60026300  | 1.66897000  | 0.00013700  |
| C | 1.21637900  | 1.48787300  | 0.00002900  |
| C | -0.71834000 | -0.15186400 | -0.00009600 |
| C | -1.21520000 | -1.48506100 | -0.00026200 |
| C | -2.60000600 | -1.66443000 | -0.00029200 |
| C | -3.44326500 | -0.56185600 | -0.00013300 |
| C | -2.87828300 | 0.71917700  | 0.00006700  |
| H | 3.50697200  | -1.59802200 | -0.00011700 |
| H | 3.00637100  | 2.67244000  | 0.00022700  |
| H | -3.00962600 | -2.66658100 | -0.00042000 |
| H | -3.50287100 | 1.60248600  | 0.00020900  |
| O | -0.42870400 | -2.56476700 | -0.00036500 |
| H | 0.50996500  | -2.23257500 | -0.00024800 |
| O | 0.42730800  | 2.56378200  | -0.00001000 |
| H | -0.51285400 | 2.22659700  | -0.00024300 |
| N | 1.56887200  | -0.89936000 | -0.00015000 |
| N | -1.56434600 | 0.90233600  | 0.00008600  |
| C | -4.91908900 | -0.79392700 | -0.00015600 |
| C | 4.91841300  | 0.79565300  | 0.00018900  |
| O | 5.43883300  | 1.88588200  | 0.00030500  |
| O | -5.42698500 | -1.88922300 | -0.00027500 |
| C | -7.05834000 | 0.23762000  | 0.00007500  |
| C | -7.62446900 | 1.64125600  | 0.00101800  |
| H | -7.35796100 | -0.33301100 | 0.88218400  |
| H | -7.35813100 | -0.33186700 | -0.88272300 |

|   |             |             |             |
|---|-------------|-------------|-------------|
| H | -7.29999200 | 2.19061100  | -0.88528900 |
| H | -8.71640300 | 1.60025000  | 0.00105100  |
| H | -7.29989200 | 2.18945200  | 0.88800600  |
| C | 7.05414300  | -0.23936900 | 0.00017000  |
| C | 7.62049400  | -1.64396800 | -0.00022900 |
| H | 7.35758500  | 0.32987700  | 0.88247100  |
| H | 7.35760900  | 0.33039900  | -0.88178300 |
| H | 7.29331000  | -2.19207000 | -0.88636400 |
| H | 8.71293200  | -1.60555500 | -0.00020900 |
| H | 7.29329500  | -2.19258800 | 0.88557900  |
| O | 5.61170400  | -0.36170000 | 0.00012300  |
| O | -5.61024900 | 0.35880300  | -0.00000700 |

The geometric structure coordinates of N\* under  $E_x = +1 \times 10^{-3}$  a.u.

|   |             |             |             |
|---|-------------|-------------|-------------|
| C | 0.70089800  | 0.15906300  | 0.00022200  |
| C | 2.87414400  | -0.69982900 | -0.00006800 |
| C | 3.45719300  | 0.59258800  | 0.00035200  |
| C | 2.60378700  | 1.70492600  | 0.00073900  |
| C | 1.22211000  | 1.50976700  | 0.00069800  |
| C | -0.69728600 | -0.12636100 | 0.00004700  |
| C | -1.21418500 | -1.48638300 | -0.00047000 |
| C | -2.59418300 | -1.68769100 | -0.00060300 |
| C | -3.45000600 | -0.58131800 | -0.00025500 |
| C | -2.87693900 | 0.71014000  | 0.00020700  |
| H | 3.50975500  | -1.57648900 | -0.00039000 |
| H | 3.00580700  | 2.70916500  | 0.00107900  |
| H | -2.99348700 | -2.69336400 | -0.00097100 |
| H | -3.51711700 | 1.58336100  | 0.00046900  |
| O | -0.39688200 | -2.52537600 | -0.00082900 |
| H | 0.55523500  | -2.14938600 | -0.00074200 |

|   |             |             |             |
|---|-------------|-------------|-------------|
| O | 0.41420200  | 2.55969200  | 0.00112900  |
| H | -0.53540600 | 2.19991600  | 0.00113800  |
| N | 1.57244500  | -0.90577700 | -0.00014900 |
| N | -1.56898100 | 0.92678200  | 0.00034200  |
| C | -4.91124100 | -0.80376000 | -0.00039600 |
| C | 4.91174800  | 0.80068400  | 0.00038700  |
| O | 5.45381100  | 1.88818300  | 0.00075600  |
| O | -5.42766300 | -1.89989700 | -0.00072700 |
| C | -7.04952600 | 0.23452800  | 0.00003600  |
| C | -7.61885900 | 1.63725200  | 0.00067700  |
| H | -7.35093900 | -0.33641900 | 0.88181800  |
| H | -7.35099100 | -0.33563000 | -0.88224000 |
| H | -7.29531700 | 2.18720100  | -0.88575800 |
| H | -8.71079100 | 1.59486100  | 0.00068500  |
| H | -7.29527300 | 2.18640700  | 0.88758800  |
| C | 7.03877000  | -0.25815200 | -0.00001900 |
| C | 7.60152300  | -1.66505400 | -0.00056000 |
| H | 7.34945400  | 0.30950300  | 0.88161300  |
| H | 7.34941100  | 0.31016600  | -0.88123900 |
| H | 7.27183000  | -2.21217400 | -0.88662900 |
| H | 8.69431300  | -1.63179400 | -0.00057000 |
| H | 7.27186800  | -2.21284000 | 0.88511200  |
| O | 5.60100700  | -0.37406100 | -0.00002700 |
| O | -5.60440000 | 0.35716800  | 0.00004400  |

The geometric structure coordinates of T1\* under  $E_x = +1 \times 10^{-3}$  a.u.

|   |            |             |             |
|---|------------|-------------|-------------|
| C | 0.67489700 | 0.17433700  | -0.11307100 |
| C | 2.91358100 | -0.71494400 | -0.13864700 |
| C | 3.45260900 | 0.54508200  | 0.03293600  |
| C | 2.58788300 | 1.66262800  | 0.11615400  |



|   |             |             |             |
|---|-------------|-------------|-------------|
| C | 1.20873700  | 1.48303500  | 0.03740000  |
| C | -0.74513800 | -0.12452900 | -0.01304300 |
| C | -1.23263300 | -1.50179600 | 0.15120700  |
| C | -2.62382600 | -1.66818600 | 0.12573500  |
| C | -3.48294600 | -0.55988800 | 0.04047500  |
| C | -2.93161700 | 0.71170800  | -0.04839700 |
| H | 3.51825700  | -1.60454900 | -0.22691600 |
| H | 2.99483100  | 2.65868000  | 0.21616100  |
| H | -3.03311900 | -2.66008300 | 0.26210600  |
| H | -3.54877700 | 1.59943300  | -0.04806400 |
| O | -0.39349800 | -2.46587700 | 0.26086400  |
| H | 1.16176400  | -1.80202600 | -0.25114000 |
| O | 0.41438400  | 2.55259900  | 0.09939900  |
| H | -0.52089900 | 2.23656100  | -0.01950100 |
| N | 1.58350800  | -0.86536700 | -0.24787900 |
| N | -1.60452500 | 0.88845100  | -0.12457600 |
| C | -4.94988100 | -0.79131600 | 0.08572100  |
| C | 4.91518900  | 0.75688400  | 0.09407700  |
| O | 5.44054400  | 1.83732000  | 0.23895400  |
| O | -5.45753600 | -1.88219800 | 0.20696100  |
| C | -7.09496900 | 0.22612800  | 0.01096600  |
| C | -7.67257800 | 1.61879400  | -0.12543700 |
| H | -7.37927600 | -0.25113700 | 0.95192300  |
| H | -7.40562900 | -0.43349400 | -0.80286100 |
| H | -7.36391700 | 2.07527100  | -1.06837500 |
| H | -8.76416000 | 1.57178700  | -0.10566300 |
| H | -7.34009200 | 2.25827800  | 0.69515000  |
| C | 7.04930900  | -0.28524400 | 0.04361900  |
| C | 7.61795700  | -1.68130500 | -0.10530200 |
| H | 7.32287600  | 0.17262100  | 0.99780500  |

|   |             |             |             |
|---|-------------|-------------|-------------|
| H | 7.38492500  | 0.38478900  | -0.75221700 |
| H | 7.32374500  | -2.11842500 | -1.06205800 |
| H | 8.70967000  | -1.64646200 | -0.06205300 |
| H | 7.26090700  | -2.33158300 | 0.69633800  |
| O | 5.60966100  | -0.40200100 | -0.02160000 |
| O | -5.65029400 | 0.35591000  | -0.02465600 |

The geometric structure coordinates of T2\* under  $E_x = +1 \times 10^{-3}$  a.u.

|   |             |             |             |
|---|-------------|-------------|-------------|
| C | 0.74626300  | 0.15697500  | 0.03600400  |
| C | 2.93033000  | -0.69050500 | 0.06535800  |
| C | 3.49453500  | 0.57804100  | -0.01865700 |
| C | 2.63882800  | 1.69371200  | -0.09034600 |
| C | 1.24870200  | 1.53302100  | -0.11198500 |
| C | -0.66842800 | -0.13940600 | 0.13119000  |
| C | -1.19796200 | -1.45579500 | -0.00638600 |
| C | -2.57393200 | -1.64051300 | -0.09464000 |
| C | -3.44614800 | -0.53087000 | -0.02765000 |
| C | -2.91740700 | 0.73314500  | 0.13881200  |
| H | 3.54201500  | -1.58236700 | 0.05877300  |
| H | 3.05047800  | 2.68548200  | -0.21858400 |
| H | -2.97577200 | -2.63923800 | -0.19244000 |
| H | -3.52955400 | 1.61838100  | 0.22102700  |
| O | -0.40044800 | -2.52359800 | -0.05478000 |
| H | 0.53420300  | -2.20095200 | 0.05527800  |
| O | 0.41372200  | 2.50228500  | -0.20335200 |
| H | -1.17960600 | 1.83303900  | 0.26913000  |
| N | 1.60644000  | -0.86328400 | 0.13933700  |
| N | -1.58729000 | 0.89345200  | 0.25170800  |
| C | -4.91080100 | -0.76060700 | -0.09740200 |
| C | 4.95569900  | 0.79169500  | -0.07139700 |

|   |             |             |             |
|---|-------------|-------------|-------------|
| O | 5.48812600  | 1.87445600  | -0.17849000 |
| O | -5.41151800 | -1.85205900 | -0.23511300 |
| C | -7.05848800 | 0.25758700  | -0.06458400 |
| C | -7.63948500 | 1.64851900  | 0.07309600  |
| H | -7.38564000 | -0.41051200 | 0.73559100  |
| H | -7.32095700 | -0.20994300 | -1.01654900 |
| H | -7.28885700 | 2.29688600  | -0.73284800 |
| H | -8.73016000 | 1.60099500  | 0.02708900  |
| H | -7.35446400 | 2.09507000  | 1.02820500  |
| C | 7.08795000  | -0.25210000 | -0.03125700 |
| C | 7.65488100  | -1.65315400 | 0.07372500  |
| H | 7.41673800  | 0.38857800  | 0.79140100  |
| H | 7.37314400  | 0.23954200  | -0.96523300 |
| H | 7.30643100  | -2.27364100 | -0.75488100 |
| H | 8.74719600  | -1.61818200 | 0.04488800  |
| H | 7.34797500  | -2.12439300 | 1.01005200  |
| O | 5.64935100  | -0.37084300 | 0.01485500  |
| O | -5.61372900 | 0.38680900  | 0.00355000  |

The geometric structure coordinates of T3\* in under  $E_x = +1 \times 10^{-3}$  a.u.

|   |             |             |             |
|---|-------------|-------------|-------------|
| C | 0.68805300  | 0.17187300  | 0.00018500  |
| C | 2.92406300  | -0.69889800 | -0.00021900 |
| C | 3.47167200  | 0.58712600  | 0.00035600  |
| C | 2.61614900  | 1.69682100  | 0.00085100  |
| C | 1.20168000  | 1.54601800  | 0.00075900  |
| C | -0.68571400 | -0.15943400 | 0.00004200  |
| C | -1.19712300 | -1.53464000 | -0.00050300 |
| C | -2.61149800 | -1.68431800 | -0.00055500 |
| C | -3.46577800 | -0.57649900 | -0.00006300 |
| C | -2.92260600 | 0.70910900  | 0.00046700  |

|   |             |             |             |
|---|-------------|-------------|-------------|
| H | 3.53184900  | -1.59113100 | -0.00058200 |
| H | 3.02554600  | 2.69818800  | 0.00133600  |
| H | -3.02296800 | -2.68503200 | -0.00100400 |
| H | -3.53235300 | 1.60012200  | 0.00082000  |
| O | -0.39917700 | -2.51885600 | -0.00093600 |
| H | 1.13065500  | -1.80072500 | -0.00068500 |
| O | 0.40369300  | 2.52986900  | 0.00119100  |
| H | -1.12624400 | 1.81201500  | 0.00093200  |
| N | 1.59866800  | -0.86527900 | -0.00027000 |
| N | -1.59429700 | 0.87669100  | 0.00049800  |
| C | -4.93550000 | -0.79138300 | -0.00016400 |
| C | 4.93608800  | 0.79229400  | 0.00048700  |
| O | 5.47606300  | 1.87570900  | 0.00096200  |
| O | -5.45662500 | -1.88168600 | -0.00056000 |
| C | -7.06712200 | 0.26245800  | 0.00019100  |
| C | -7.62477500 | 1.66972600  | 0.00029800  |
| H | -7.37200700 | -0.30548300 | 0.88242300  |
| H | -7.37199500 | -0.30530300 | -0.88215900 |
| H | -7.29731700 | 2.21676000  | -0.88651900 |
| H | -8.71696800 | 1.63588600  | 0.00020300  |
| H | -7.29744100 | 2.21663900  | 0.88722800  |
| C | 7.05981900  | -0.27467300 | 0.00003200  |
| C | 7.61375400  | -1.68466600 | -0.00073600 |
| H | 7.37137100  | 0.29097300  | 0.88218200  |
| H | 7.37131800  | 0.29197400  | -0.88149400 |
| H | 7.28182900  | -2.22982400 | -0.88712800 |
| H | 8.70658200  | -1.65695900 | -0.00079700 |
| H | 7.28196900  | -2.23071400 | 0.88516900  |
| O | 5.61871300  | -0.38232400 | 0.00001600  |
| O | -5.61957800 | 0.37357400  | 0.00023500  |

The geometric structure coordinates of TS\* of N\*-T1\* path under  $E_x = +1 \times 10^{-3}$  a.u.

|   |             |             |             |
|---|-------------|-------------|-------------|
| C | 0.69194058  | 0.23873809  | -0.01305923 |
| C | 2.85456958  | -0.68898191 | 0.01227577  |
| C | 3.45271158  | 0.58936509  | -0.04099123 |
| C | 2.61642658  | 1.72121209  | -0.08120823 |
| C | 1.23104858  | 1.56057109  | -0.06780323 |
| C | -0.71671142 | -0.05686491 | 0.00574777  |
| C | -1.18599542 | -1.44234991 | 0.06267477  |
| C | -2.56648842 | -1.67465991 | 0.07893477  |
| C | -3.44666442 | -0.58582391 | 0.04068677  |
| C | -2.90902442 | 0.71067409  | -0.01317923 |
| H | 3.46121158  | -1.58404291 | 0.04433977  |
| H | 3.04384858  | 2.71389209  | -0.12240823 |
| H | -2.94321242 | -2.68821991 | 0.12067377  |
| H | -3.56666942 | 1.56967209  | -0.04371923 |
| O | -0.31734742 | -2.41458091 | 0.09648977  |
| H | 0.72451658  | -1.88965991 | 0.07036577  |
| O | 0.44421358  | 2.63468109  | -0.10600723 |
| H | -0.50009542 | 2.31280409  | -0.08850323 |
| N | 1.54651858  | -0.84353691 | 0.02507177  |
| N | -1.59137842 | 0.96573509  | -0.02999823 |
| C | -4.90603242 | -0.84214791 | 0.05833177  |
| C | 4.90971158  | 0.77093809  | -0.05549423 |
| O | 5.47212458  | 1.84748809  | -0.10038923 |
| O | -5.39323142 | -1.94929891 | 0.10418677  |
| C | -7.06868742 | 0.14348509  | 0.03123877  |
| C | -7.66983842 | 1.53180709  | -0.01887023 |
| H | -7.35120042 | -0.39939191 | 0.93650377  |
| H | -7.36068542 | -0.46713791 | -0.82661923 |

|   |             |             |             |
|---|-------------|-------------|-------------|
| H | -7.36440742 | 2.05398109  | -0.92818723 |
| H | -8.76044542 | 1.46432109  | -0.00990323 |
| H | -7.35406042 | 2.12233909  | 0.84389877  |
| C | 7.01739658  | -0.32632491 | -0.02349023 |
| C | 7.55505958  | -1.74213191 | 0.02864577  |
| H | 7.34311658  | 0.26949809  | 0.83378277  |
| H | 7.33398658  | 0.20115509  | -0.92767223 |
| H | 7.21110158  | -2.31749891 | -0.83382323 |
| H | 8.64825758  | -1.72878591 | 0.02247377  |
| H | 7.22024058  | -2.24885991 | 0.93657277  |
| O | 5.57814958  | -0.41632191 | -0.01252723 |
| O | -5.62565342 | 0.29925409  | 0.01747877  |

The geometric structure coordinates of TS\* of T1\*-T3\* path under  $E_x = +1 \times 10^{-3}$  a.u.

|   |             |             |             |
|---|-------------|-------------|-------------|
| C | 0.70230309  | 0.10639166  | -0.07436620 |
| C | 2.91619209  | -0.75022934 | 0.19866480  |
| C | 3.47120209  | 0.49435266  | -0.11722120 |
| C | 2.62326509  | 1.57335366  | -0.41914020 |
| C | 1.22287609  | 1.41188966  | -0.40594020 |
| C | -0.70217091 | -0.15525434 | -0.03961220 |
| C | -1.28236191 | -1.45739334 | 0.28729980  |
| C | -2.69756291 | -1.52694234 | 0.27343480  |
| C | -3.47182591 | -0.39862234 | -0.04021720 |
| C | -2.83460191 | 0.80705866  | -0.34103220 |
| H | 3.51987509  | -1.61224234 | 0.43892280  |
| H | 3.04234109  | 2.53998966  | -0.66389020 |
| H | -3.17847591 | -2.46753234 | 0.50753380  |
| H | -3.39112691 | 1.69976466  | -0.58788820 |
| O | -0.52278691 | -2.44040634 | 0.56206580  |
| H | 1.11550609  | -1.80149934 | 0.43543580  |

|   |             |             |             |
|---|-------------|-------------|-------------|
| O | 0.40537309  | 2.37860566  | -0.67660920 |
| H | -0.71454291 | 1.85972066  | -0.56598220 |
| N | 1.59407509  | -0.90503934 | 0.21159780  |
| N | -1.49386291 | 0.90717266  | -0.33542620 |
| C | -4.95118591 | -0.51879334 | -0.04428420 |
| C | 4.93540809  | 0.69437466  | -0.13837620 |
| O | 5.47877309  | 1.74399066  | -0.40304720 |
| O | -5.54149091 | -1.54354334 | 0.21113780  |
| C | -7.00830991 | 0.64196866  | -0.38856320 |
| C | -7.57803791 | 0.79737366  | 1.01144880  |
| H | -7.34839791 | -0.28454434 | -0.85405120 |
| H | -7.26611991 | 1.48652466  | -1.02740020 |
| H | -7.19269291 | 1.70299266  | 1.48563080  |
| H | -8.66780791 | 0.87056866  | 0.96165480  |
| H | -7.31822691 | -0.06608434 | 1.62504880  |
| C | 7.05386909  | -0.33543334 | 0.17797180  |
| C | 7.60114109  | -1.69710834 | 0.55349280  |
| H | 7.34910309  | 0.43946066  | 0.89036380  |
| H | 7.38612809  | -0.01565134 | -0.81327120 |
| H | 7.28413709  | -2.45347434 | -0.16795320 |
| H | 8.69384509  | -1.66954434 | 0.56791180  |
| H | 7.24994709  | -1.99522334 | 1.54386080  |
| O | 5.61227709  | -0.44077234 | 0.17468380  |
| O | -5.55553291 | 0.64641566  | -0.36802820 |

The geometric structure coordinates of TS\* of N\*-T2\* path under  $E_x = +1 \times 10^{-3}$  a.u.

|   |            |             |             |
|---|------------|-------------|-------------|
| C | 0.71198721 | 0.07201022  | 0.01102986  |
| C | 2.90021821 | -0.70715178 | -0.02663314 |
| C | 3.44615221 | 0.59183922  | 0.07425186  |
| C | 2.56736321 | 1.68186722  | 0.14662086  |

|   |             |             |             |
|---|-------------|-------------|-------------|
| C | 1.18577421  | 1.45213922  | 0.11714186  |
| C | -0.68545479 | -0.21878978 | -0.02284114 |
| C | -1.22549279 | -1.54421878 | -0.12550014 |
| C | -2.60934879 | -1.70502578 | -0.14973714 |
| C | -3.44461879 | -0.57838178 | -0.07390114 |
| C | -2.85412579 | 0.69718522  | 0.02557686  |
| H | 3.55941921  | -1.56401178 | -0.08394514 |
| H | 2.94356921  | 2.69316322  | 0.22460586  |
| H | -3.03753979 | -2.69557578 | -0.22665414 |
| H | -3.46564479 | 1.58755922  | 0.08600386  |
| O | -0.43370979 | -2.61042678 | -0.19714314 |
| H | 0.51158921  | -2.28102478 | -0.16429014 |
| O | 0.32000121  | 2.42490222  | 0.18105786  |
| H | -0.72524379 | 1.90260222  | 0.13330886  |
| N | 1.59342021  | -0.95927078 | -0.05715914 |
| N | -1.54314879 | 0.85843022  | 0.04906786  |
| C | -4.90869179 | -0.76929178 | -0.10079114 |
| C | 4.89862121  | 0.83348022  | 0.10530586  |
| O | 5.41058821  | 1.93053022  | 0.19056286  |
| O | -5.44914979 | -1.85085778 | -0.18582014 |
| C | -7.02537179 | 0.31133022  | -0.03854414 |
| C | -7.56662179 | 1.72173722  | 0.06133086  |
| H | -7.34627379 | -0.31623078 | 0.79667086  |
| H | -7.33134379 | -0.18595878 | -0.96238714 |
| H | -7.22457279 | 2.32851422  | -0.77997714 |
| H | -8.65916479 | 1.70224622  | 0.05067786  |
| H | -7.23949279 | 2.19754422  | 0.98845786  |
| C | 7.05130421  | -0.17031078 | 0.05143386  |
| C | 7.64688221  | -1.56011078 | -0.04470914 |
| H | 7.33907721  | 0.33882622  | 0.97534386  |



|   |             |             |             |
|---|-------------|-------------|-------------|
| H | 7.35537721  | 0.46746222  | -0.78309514 |
| H | 7.33873321  | -2.04891178 | -0.97163614 |
| H | 8.73846021  | -1.50148878 | -0.03033314 |
| H | 7.32240721  | -2.17812778 | 0.79543386  |
| O | 5.61551821  | -0.31925378 | 0.02723686  |
| O | -5.57871279 | 0.40399322  | -0.01937514 |

The geometric structure coordinates of TS\* of T2\*-T3\* path under  $E_x = +1 \times 10^{-3}$  a.u.

|   |             |             |             |
|---|-------------|-------------|-------------|
| C | 0.70336400  | 0.27817506  | 0.13301560  |
| C | 2.83560300  | -0.68141994 | -0.19632040 |
| C | 3.48146500  | 0.51368106  | 0.14483060  |
| C | 2.70793700  | 1.63355106  | 0.49310560  |
| C | 1.29142100  | 1.56634406  | 0.50241160  |
| C | -0.69510300 | 0.01746606  | 0.08619060  |
| C | -1.21355100 | -1.28067594 | -0.28834740 |
| C | -2.61281000 | -1.44515994 | -0.30834540 |
| C | -3.46411500 | -0.38175894 | 0.02600260  |
| C | -2.91797100 | 0.85301606  | 0.38141260  |
| H | 3.38961000  | -1.56777994 | -0.47119140 |
| H | 3.18743400  | 2.56606806  | 0.75935260  |
| H | -3.02910600 | -2.40471894 | -0.58444340 |
| H | -3.52769700 | 1.70345306  | 0.64682460  |
| O | -0.39507000 | -2.23712494 | -0.58913540 |
| H | 0.72851900  | -1.71829494 | -0.45910040 |
| O | 0.53824600  | 2.54344806  | 0.80782960  |
| H | -1.12928100 | 1.90679606  | 0.65587460  |
| N | 1.50087400  | -0.77857994 | -0.19706440 |
| N | -1.59347400 | 1.01520406  | 0.40151760  |
| C | -4.93301700 | -0.59420894 | -0.00498440 |
| C | 4.95443000  | 0.62001406  | 0.14603760  |

|   |             |             |             |
|---|-------------|-------------|-------------|
| O | 5.56970300  | 1.62418106  | 0.43122960  |
| O | -5.45066500 | -1.64450194 | -0.30788740 |
| C | -7.06393700 | 0.42681306  | 0.33773960  |
| C | -7.61621500 | 0.59684306  | -1.06728240 |
| H | -7.38326900 | 1.23103806  | 1.00018160  |
| H | -7.35371700 | -0.53462094 | 0.76464960  |
| H | -7.29267900 | -0.22649894 | -1.70527940 |
| H | -8.70907200 | 0.60076306  | -1.03654340 |
| H | -7.28017800 | 1.54102606  | -1.50201540 |
| C | 7.00004100  | -0.52717894 | -0.23579240 |
| C | 7.45750000  | -1.90941394 | -0.65490840 |
| H | 7.36727100  | -0.25463894 | 0.75735960  |
| H | 7.33294500  | 0.24651306  | -0.93296640 |
| H | 7.07126900  | -2.16014994 | -1.64536940 |
| H | 8.54952000  | -1.94800394 | -0.68918240 |
| H | 7.10676700  | -2.66351794 | 0.05317960  |
| O | 5.55635700  | -0.54513894 | -0.21175240 |
| O | -5.61254000 | 0.51952406  | 0.34629560  |

The geometric structure coordinates of N under  $E_x = +2 \times 10^{-3}$  a.u.

|   |             |             |             |
|---|-------------|-------------|-------------|
| C | 0.72230300  | 0.15223100  | 0.00006100  |
| C | 2.88526400  | -0.71183600 | -0.00006700 |
| C | 3.44836000  | 0.56851800  | 0.00008100  |
| C | 2.60061400  | 1.67139000  | 0.00023400  |
| C | 1.21718800  | 1.48956200  | 0.00023200  |
| C | -0.71679400 | -0.15140700 | 0.00001700  |
| C | -1.21459600 | -1.48332600 | -0.00015200 |
| C | -2.59986100 | -1.66181600 | -0.00016100 |
| C | -3.44169700 | -0.55927700 | -0.00001600 |
| C | -2.87584400 | 0.72204500  | 0.00013300  |

|   |             |             |             |
|---|-------------|-------------|-------------|
| H | 3.50909100  | -1.59577500 | -0.00018500 |
| H | 3.00512800  | 2.67546200  | 0.00036000  |
| H | -3.01121800 | -2.66331500 | -0.00028600 |
| H | -3.50070800 | 1.60515700  | 0.00024500  |
| O | -0.42935100 | -2.56480500 | -0.00031500 |
| H | 0.50866900  | -2.23493300 | -0.00031400 |
| O | 0.42686900  | 2.56351000  | 0.00040200  |
| H | -0.51417400 | 2.22384100  | 0.00040600  |
| N | 1.57122100  | -0.89777200 | -0.00007600 |
| N | -1.56201300 | 0.90429600  | 0.00014800  |
| C | -4.91939200 | -0.79269800 | -0.00002900 |
| C | 4.91828700  | 0.79649700  | 0.00008600  |
| O | 5.44504300  | 1.88409900  | 0.00024700  |
| O | -5.42092200 | -1.89060400 | -0.00018600 |
| C | -7.06086000 | 0.23648000  | 0.00001800  |
| C | -7.62736900 | 1.63942200  | 0.00072500  |
| H | -7.35837900 | -0.33443400 | 0.88237000  |
| H | -7.35841800 | -0.33353900 | -0.88290500 |
| H | -7.30439900 | 2.18897100  | -0.88599000 |
| H | -8.71907500 | 1.59673300  | 0.00069200  |
| H | -7.30441300 | 2.18806500  | 0.88800600  |
| C | 7.05226900  | -0.24061700 | 0.00001100  |
| C | 7.61873700  | -1.64570800 | -0.00034100 |
| H | 7.35771800  | 0.32836400  | 0.88212500  |
| H | 7.35771000  | 0.32881000  | -0.88181500 |
| H | 7.29029000  | -2.19365700 | -0.88612600 |
| H | 8.71146800  | -1.60847600 | -0.00033800 |
| H | 7.29030200  | -2.19410100 | 0.88517400  |
| O | 5.61260400  | -0.36337700 | -0.00000900 |
| O | -5.60981200 | 0.35762500  | 0.00003100  |

The geometric structure coordinates of N\* under  $E_x = +2 \times 10^{-3}$  a.u.

|   |             |             |             |
|---|-------------|-------------|-------------|
| C | 0.70493400  | 0.17763100  | 0.00024900  |
| C | 2.87398400  | -0.69402800 | 0.00015300  |
| C | 3.46281800  | 0.59798100  | 0.00036300  |
| C | 2.61077800  | 1.71342700  | 0.00052000  |
| C | 1.22774100  | 1.52203600  | 0.00046900  |
| C | -0.69762200 | -0.10869200 | 0.00016500  |
| C | -1.21087100 | -1.47277600 | -0.00002700 |
| C | -2.59053300 | -1.67796200 | -0.00011300 |
| C | -3.44822600 | -0.57498800 | -0.00001600 |
| C | -2.88028300 | 0.71540900  | 0.00016500  |
| H | 3.50546900  | -1.57362000 | 0.00002800  |
| H | 3.01457200  | 2.71679500  | 0.00068700  |
| H | -2.98796000 | -2.68456800 | -0.00025400 |
| H | -3.52177200 | 1.58753600  | 0.00024500  |
| O | -0.38853900 | -2.50588800 | -0.00012500 |
| H | 0.56551800  | -2.12074000 | -0.00004000 |
| O | 0.42561700  | 2.57885300  | 0.00063900  |
| H | -0.52235000 | 2.22926400  | 0.00060800  |
| N | 1.57393700  | -0.89209900 | 0.00010100  |
| N | -1.56750400 | 0.93675800  | 0.00025000  |
| C | -4.91283400 | -0.80559200 | -0.00010700 |
| C | 4.91417000  | 0.79889500  | 0.00042000  |
| O | 5.46921800  | 1.88209200  | 0.00039500  |
| O | -5.41557000 | -1.90645300 | -0.00020400 |
| C | -7.05736900 | 0.22155400  | 0.00007600  |
| C | -7.63098300 | 1.62176500  | 0.00031400  |
| H | -7.35383400 | -0.35059700 | 0.88234300  |
| H | -7.35386300 | -0.35030800 | -0.88236800 |

|   |             |             |             |
|---|-------------|-------------|-------------|
| H | -7.31098700 | 2.17273900  | -0.88669800 |
| H | -8.72248300 | 1.57392700  | 0.00032200  |
| H | -7.31096100 | 2.17244900  | 0.88749800  |
| C | 7.03528100  | -0.27128800 | -0.00022800 |
| C | 7.59457700  | -1.68034800 | -0.00069700 |
| H | 7.35094000  | 0.29509000  | 0.88100100  |
| H | 7.35062800  | 0.29555200  | -0.88127100 |
| H | 7.26171200  | -2.22648000 | -0.88627000 |
| H | 8.68783800  | -1.65171800 | -0.00088100 |
| H | 7.26202400  | -2.22694500 | 0.88470800  |
| O | 5.60112500  | -0.38349800 | 0.00000000  |
| O | -5.60849700 | 0.34844100  | 0.00007200  |

The geometric structure coordinates of T1\* under  $E_x = +2 \times 10^{-3}$  a.u.

|   |             |             |             |
|---|-------------|-------------|-------------|
| C | 0.67745900  | 0.18705700  | 0.10747300  |
| C | 2.91207700  | -0.70820200 | 0.13469900  |
| C | 3.45598100  | 0.55129600  | -0.03172000 |
| C | 2.59308300  | 1.67188100  | -0.11659400 |
| C | 1.21314400  | 1.49429700  | -0.04238900 |
| C | -0.74422400 | -0.11283700 | 0.00573500  |
| C | -1.22636400 | -1.49058100 | -0.16122100 |
| C | -2.61835500 | -1.65796700 | -0.13821700 |
| C | -3.47832100 | -0.55234500 | -0.05031900 |
| C | -2.93155200 | 0.72069800  | 0.03990200  |
| H | 3.51327100  | -1.60035100 | 0.22054400  |
| H | 3.00171900  | 2.66752800  | -0.21282500 |
| H | -3.02701300 | -2.64992600 | -0.27678500 |
| H | -3.55061800 | 1.60696100  | 0.04070100  |
| O | -0.38578600 | -2.45344900 | -0.27114500 |
| H | 1.15424200  | -1.79024900 | 0.23662900  |

|   |             |             |             |
|---|-------------|-------------|-------------|
| O | 0.41947600  | 2.56410000  | -0.10397800 |
| H | -0.51651800 | 2.24916100  | 0.01405500  |
| N | 1.58249000  | -0.85473300 | 0.24019500  |
| N | -1.60360300 | 0.89784500  | 0.11797500  |
| C | -4.94784500 | -0.79053100 | -0.09470300 |
| C | 4.91675600  | 0.75610500  | -0.08764700 |
| O | 5.45338900  | 1.83228300  | -0.23078100 |
| O | -5.44471300 | -1.88468100 | -0.22355300 |
| C | -7.09815000 | 0.21664100  | -0.00804700 |
| C | -7.67974700 | 1.60565100  | 0.14159300  |
| H | -7.40229700 | -0.45124300 | 0.80111100  |
| H | -7.38074800 | -0.25385300 | -0.95260700 |
| H | -7.35291700 | 2.25344600  | -0.67469000 |
| H | -8.77096000 | 1.55374100  | 0.12400500  |
| H | -7.37166500 | 2.05520000  | 1.08799800  |
| C | 7.04523100  | -0.29618600 | -0.03375300 |
| C | 7.60941200  | -1.69471800 | 0.11464600  |
| H | 7.38453800  | 0.37173200  | 0.76274300  |
| H | 7.32366000  | 0.16122200  | -0.98712000 |
| H | 7.24988700  | -2.34289800 | -0.68762400 |
| H | 8.70159500  | -1.66465700 | 0.07278400  |
| H | 7.31136900  | -2.13159900 | 1.07036200  |
| O | 5.60827100  | -0.40865300 | 0.02978800  |
| O | -5.65040000 | 0.35038200  | 0.02526700  |

The geometric structure coordinates of T2\* under  $E_x = +2 \times 10^{-3}$  a.u.

|   |            |             |             |
|---|------------|-------------|-------------|
| C | 0.74672900 | 0.17476100  | 0.04511200  |
| C | 2.92904900 | -0.68004600 | 0.07447500  |
| C | 3.50126000 | 0.58661700  | -0.01178700 |
| C | 2.64772800 | 1.70620700  | -0.08003400 |

|   |             |             |             |
|---|-------------|-------------|-------------|
| C | 1.25803700  | 1.54903200  | -0.09763600 |
| C | -0.66517000 | -0.11970600 | 0.13843700  |
| C | -1.19318100 | -1.44116900 | 0.01844300  |
| C | -2.56756700 | -1.62856700 | -0.07131500 |
| C | -3.44343000 | -0.52263600 | -0.02061600 |
| C | -2.91893100 | 0.74462700  | 0.13126100  |
| H | 3.53762600  | -1.57428000 | 0.06837800  |
| H | 3.06113800  | 2.69728900  | -0.20698000 |
| H | -2.96722000 | -2.62933400 | -0.15917900 |
| H | -3.53396800 | 1.62887400  | 0.20299000  |
| O | -0.39446900 | -2.50856400 | -0.01509900 |
| H | 0.54020000  | -2.18187900 | 0.08508800  |
| O | 0.42561700  | 2.52155400  | -0.17947600 |
| H | -1.18658100 | 1.85108200  | 0.25948600  |
| N | 1.60727700  | -0.84971300 | 0.14752800  |
| N | -1.58866400 | 0.91000700  | 0.24231300  |
| C | -4.90913600 | -0.76193700 | -0.09085800 |
| C | 4.95920200  | 0.78993700  | -0.06938500 |
| O | 5.50524200  | 1.86766700  | -0.17388400 |
| O | -5.39758300 | -1.85984900 | -0.21543500 |
| C | -7.06352800 | 0.24470200  | -0.07248200 |
| C | -7.65046100 | 1.63403300  | 0.04909000  |
| H | -7.38561200 | -0.41593400 | 0.73554300  |
| H | -7.32139000 | -0.23518200 | -1.01924300 |
| H | -7.30394900 | 2.27491300  | -0.76455000 |
| H | -8.74065600 | 1.57975500  | 0.00330400  |
| H | -7.36914800 | 2.09287700  | 0.99942000  |
| C | 7.08419300  | -0.26859900 | -0.04246400 |
| C | 7.64495300  | -1.67352600 | 0.05248700  |
| H | 7.42247400  | 0.36559600  | 0.78186800  |

|   |             |             |             |
|---|-------------|-------------|-------------|
| H | 7.37040700  | 0.22622600  | -0.97486200 |
| H | 7.28834200  | -2.28758800 | -0.77748500 |
| H | 8.73762900  | -1.64520400 | 0.01895700  |
| H | 7.33858600  | -2.14817400 | 0.98732700  |
| O | 5.64866300  | -0.38086600 | 0.00925200  |
| O | -5.61599000 | 0.38058000  | -0.00549800 |

The geometric structure coordinates of T3\* in under  $E_x = +2 \times 10^{-3}$  a.u.

|   |             |             |             |
|---|-------------|-------------|-------------|
| C | 0.68943000  | 0.17810600  | -0.00049100 |
| C | 2.92460600  | -0.69387900 | -0.00068800 |
| C | 3.47502800  | 0.59254500  | -0.00016900 |
| C | 2.61869900  | 1.70284200  | 0.00016500  |
| C | 1.20399300  | 1.55157700  | 0.00007800  |
| C | -0.68490400 | -0.15327500 | -0.00065400 |
| C | -1.19502500 | -1.52882800 | -0.00113800 |
| C | -2.60950800 | -1.67789800 | -0.00078700 |
| C | -3.46328200 | -0.57123800 | -0.00033300 |
| C | -2.92183200 | 0.71433200  | -0.00006300 |
| H | 3.53118100  | -1.58687800 | -0.00100000 |
| H | 3.02701200  | 2.70458900  | 0.00054700  |
| H | -3.02202900 | -2.67830800 | -0.00098300 |
| H | -3.53237600 | 1.60487000  | 0.00025000  |
| O | -0.39703500 | -2.51314100 | -0.00179400 |
| H | 1.13267300  | -1.79474500 | -0.00123700 |
| O | 0.40600100  | 2.53518700  | 0.00046300  |
| H | -1.12399300 | 1.81744800  | 0.00016600  |
| N | 1.60074700  | -0.85917600 | -0.00083600 |
| N | -1.59216300 | 0.88209700  | -0.00019400 |
| C | -4.93554900 | -0.79096600 | -0.00009600 |
| C | 4.93666800  | 0.79291600  | 0.00003600  |



|   |             |             |             |
|---|-------------|-------------|-------------|
| O | 5.48621200  | 1.87300000  | 0.00053900  |
| O | -5.44735500 | -1.88475800 | -0.00021400 |
| C | -7.07118300 | 0.25641000  | 0.00073900  |
| C | -7.63101700 | 1.66218600  | 0.00130000  |
| H | -7.37233500 | -0.31258000 | 0.88323900  |
| H | -7.37298600 | -0.31212500 | -0.88182900 |
| H | -7.30596800 | 2.21027200  | -0.88571000 |
| H | -8.72291800 | 1.62495100  | 0.00116700  |
| H | -7.30613900 | 2.20958500  | 0.88879500  |
| C | 7.05651900  | -0.28094900 | -0.00010200 |
| C | 7.60889400  | -1.69220200 | 0.00090400  |
| H | 7.37117600  | 0.28498300  | 0.88119100  |
| H | 7.37163100  | 0.28377000  | -0.88204200 |
| H | 7.27514500  | -2.23774000 | -0.88462600 |
| H | 8.70207600  | -1.66731000 | 0.00107900  |
| H | 7.27480000  | -2.23663500 | 0.88697600  |
| O | 5.61863200  | -0.38700000 | -0.00043300 |
| O | -5.62039000 | 0.36950400  | 0.00027300  |

The geometric structure coordinates of TS\* of N\*-T1\* path under  $E_x = +2 \times 10^{-3}$  a.u.

|   |             |             |             |
|---|-------------|-------------|-------------|
| C | 0.69686918  | 0.24774495  | 0.00004841  |
| C | 2.85342918  | -0.69221205 | -0.00018159 |
| C | 3.45944518  | 0.58536195  | 0.00008841  |
| C | 2.62567618  | 1.72144395  | 0.00034441  |
| C | 1.23883018  | 1.56554395  | 0.00032741  |
| C | -0.72071682 | -0.04725405 | 0.00000141  |
| C | -1.18996082 | -1.43299605 | -0.00029159 |
| C | -2.57092882 | -1.66348605 | -0.00032659 |
| C | -3.44967082 | -0.57338005 | -0.00008259 |
| C | -2.91303882 | 0.72015295  | 0.00019241  |

|   |             |             |             |
|---|-------------|-------------|-------------|
| H | 3.45388618  | -1.59186105 | -0.00038459 |
| H | 3.05573118  | 2.71374695  | 0.00055441  |
| H | -2.95027682 | -2.67710105 | -0.00054159 |
| H | -3.56728282 | 1.58203295  | 0.00038541  |
| O | -0.32194782 | -2.40660105 | -0.00051159 |
| H | 0.72136218  | -1.88079105 | -0.00041159 |
| O | 0.45781818  | 2.64599995  | 0.00057041  |
| H | -0.48684282 | 2.33137295  | 0.00051341  |
| N | 1.54550218  | -0.83782805 | -0.00019759 |
| N | -1.58841682 | 0.97271095  | 0.00023241  |
| C | -4.91297982 | -0.83410005 | -0.00012359 |
| C | 4.91354118  | 0.75875395  | 0.00010741  |
| O | 5.48965918  | 1.83125095  | 0.00033441  |
| O | -5.39011382 | -1.94520005 | -0.00035759 |
| C | -7.07878282 | 0.14691295  | 0.00010841  |
| C | -7.68015282 | 1.53530795  | 0.00040841  |
| H | -7.36287882 | -0.43097305 | 0.88253041  |
| H | -7.36289482 | -0.43059805 | -0.88255259 |
| H | -7.37142782 | 2.09261095  | -0.88660259 |
| H | -8.77044382 | 1.46538195  | 0.00040341  |
| H | -7.37141082 | 2.09223495  | 0.88764941  |
| C | 7.01389618  | -0.35243805 | -0.00016359 |
| C | 7.54640518  | -1.77188505 | -0.00048059 |
| H | 7.34035818  | 0.20769995  | 0.88109141  |
| H | 7.34033318  | 0.20808395  | -0.88118259 |
| H | 7.20342018  | -2.31168005 | -0.88609759 |
| H | 8.64000918  | -1.76415905 | -0.00049459 |
| H | 7.20344518  | -2.31206605 | 0.88491041  |
| O | 5.57802218  | -0.43743305 | -0.00016259 |
| O | -5.63177082 | 0.30330295  | 0.00012841  |

The geometric structure coordinates of TS\* of T1\*-T3\* path under  $E_x = +2 \times 10^{-3}$  a.u.

|   |             |             |             |
|---|-------------|-------------|-------------|
| C | 0.69754992  | 0.08595497  | -0.00040957 |
| C | 2.94009592  | -0.73206003 | 0.00491743  |
| C | 3.45031692  | 0.57261897  | -0.00369457 |
| C | 2.56050392  | 1.66161497  | -0.01082957 |
| C | 1.16625292  | 1.45008097  | -0.00938957 |
| C | -0.70004208 | -0.22999703 | 0.00159743  |
| C | -1.22335008 | -1.59459803 | 0.01048543  |
| C | -2.63477308 | -1.71445203 | 0.01122743  |
| C | -3.45471908 | -0.57558803 | 0.00375843  |
| C | -2.87046008 | 0.69051997  | -0.00448757 |
| H | 3.57487492  | -1.60499703 | 0.01066043  |
| H | 2.94204692  | 2.67364397  | -0.01748057 |
| H | -3.07875408 | -2.70134303 | 0.01763143  |
| H | -3.46326908 | 1.59388997  | -0.01043057 |
| O | -0.42102908 | -2.58310303 | 0.01696743  |
| H | 1.17526592  | -1.87167703 | 0.01243543  |
| O | 0.31045792  | 2.42156997  | -0.01574357 |
| H | -0.78731708 | 1.84986097  | -0.01199557 |
| N | 1.62569292  | -0.93116603 | 0.00628343  |
| N | -1.53077108 | 0.83875397  | -0.00539557 |
| C | -4.93200908 | -0.75600703 | 0.00484743  |
| C | 4.90345992  | 0.82128597  | -0.00536757 |
| O | 5.41627492  | 1.92026197  | -0.01257557 |
| O | -5.47255908 | -1.83666703 | 0.01184343  |
| C | -7.04080508 | 0.34238897  | -0.00244157 |
| C | -7.56635308 | 1.76144697  | -0.01154757 |
| H | -7.35682208 | -0.21310803 | 0.88352043  |
| H | -7.35670408 | -0.22439003 | -0.88127257 |

|   |             |             |             |
|---|-------------|-------------|-------------|
| H | -7.22751008 | 2.29533097  | -0.90204157 |
| H | -8.65887308 | 1.75118397  | -0.01155957 |
| H | -7.22763608 | 2.30666497  | 0.87210043  |
| C | 7.05723792  | -0.18247703 | 0.00110843  |
| C | 7.65579992  | -1.57469903 | 0.01001743  |
| H | 7.35323292  | 0.39860597  | 0.87900843  |
| H | 7.35313892  | 0.38728197  | -0.88421257 |
| H | 7.34007392  | -2.13605303 | -0.87223557 |
| H | 8.74753392  | -1.51365703 | 0.00956443  |
| H | 7.34017392  | -2.12468103 | 0.89943943  |
| O | 5.62350792  | -0.33578403 | 0.00216943  |
| O | -5.58846708 | 0.42049397  | -0.00284957 |

The geometric structure coordinates of TS\* of N\*-T2\* path under  $E_x = +2 \times 10^{-3}$  a.u.

|   |             |             |             |
|---|-------------|-------------|-------------|
| C | 0.71117832  | 0.07815086  | 0.00000484  |
| C | 2.89615432  | -0.71099214 | -0.00017316 |
| C | 3.44836532  | 0.59341986  | 0.00005784  |
| C | 2.57146332  | 1.68825386  | 0.00027184  |
| C | 1.18844532  | 1.45954686  | 0.00025084  |
| C | -0.68392668 | -0.21078814 | -0.00002716 |
| C | -1.22672168 | -1.54141914 | -0.00026316 |
| C | -2.61057668 | -1.70088014 | -0.00027216 |
| C | -3.44313368 | -0.57191114 | -0.00005316 |
| C | -2.85312368 | 0.70614886  | 0.00017184  |
| H | 3.55416832  | -1.57084614 | -0.00034116 |
| H | 2.94879032  | 2.70201186  | 0.00045184  |
| H | -3.04140668 | -2.69347314 | -0.00044816 |
| H | -3.46420468 | 1.59887186  | 0.00034384  |
| O | -0.43509568 | -2.60919614 | -0.00046916 |
| H | 0.51121232  | -2.27705114 | -0.00042316 |

|   |             |             |             |
|---|-------------|-------------|-------------|
| O | 0.32554932  | 2.43670386  | 0.00044384  |
| H | -0.72316268 | 1.91351286  | 0.00036384  |
| N | 1.59316532  | -0.96097114 | -0.00019916 |
| N | -1.53967168 | 0.86805386  | 0.00018184  |
| C | -4.91119668 | -0.76664314 | -0.00006816 |
| C | 4.89789032  | 0.82866886  | 0.00007884  |
| O | 5.42322432  | 1.92480686  | 0.00027284  |
| O | -5.44300768 | -1.85427714 | -0.00025916 |
| C | -7.03037368 | 0.31243986  | 0.00016084  |
| C | -7.57103468 | 1.72587886  | 0.00042384  |
| H | -7.34103068 | -0.25233714 | 0.88232684  |
| H | -7.34105768 | -0.25201914 | -0.88220016 |
| H | -7.23798268 | 2.26918886  | -0.88656816 |
| H | -8.66338668 | 1.70413886  | 0.00043684  |
| H | -7.23795668 | 2.26886886  | 0.88760284  |
| C | 7.04481032  | -0.18819214 | -0.00014216 |
| C | 7.63668132  | -1.58364914 | -0.00040516 |
| H | 7.34557432  | 0.38556886  | 0.88127684  |
| H | 7.34554632  | 0.38588786  | -0.88136216 |
| H | 7.31720432  | -2.13749614 | -0.88606716 |
| H | 8.72888132  | -1.52893014 | -0.00041316 |
| H | 7.31723332  | -2.13781714 | 0.88506584  |
| O | 5.61234432  | -0.33439914 | -0.00014516 |
| O | -5.57969868 | 0.40533286  | 0.00015684  |

The geometric structure coordinates of TS\* of T2\*-T3\* path under  $E_x = +2 \times 10^{-3}$  a.u.

|   |            |             |             |
|---|------------|-------------|-------------|
| C | 0.69315597 | 0.26828517  | 0.00082379  |
| C | 2.86179997 | -0.66868283 | -0.00203321 |
| C | 3.46598297 | 0.59783717  | 0.00170279  |
| C | 2.64913297 | 1.74142717  | 0.00512979  |

|   |             |             |             |
|---|-------------|-------------|-------------|
| C | 1.23470897  | 1.62764917  | 0.00483879  |
| C | -0.69248503 | -0.04777483 | -0.00006821 |
| C | -1.15883203 | -1.41928183 | -0.00414621 |
| C | -2.55081803 | -1.63617483 | -0.00477321 |
| C | -3.44478103 | -0.55729483 | -0.00154921 |
| C | -2.95097703 | 0.74733017  | 0.00233579  |
| H | 3.44886797  | -1.57623683 | -0.00475521 |
| H | 3.09132197  | 2.72868917  | 0.00803879  |
| H | -2.92869403 | -2.64998983 | -0.00778321 |
| H | -3.59572303 | 1.61340317  | 0.00492879  |
| O | -0.30284903 | -2.38968183 | -0.00704921 |
| H | 0.80290697  | -1.81079883 | -0.00535421 |
| O | 0.44693397  | 2.62419217  | 0.00782279  |
| H | -1.20893003 | 1.90639117  | 0.00575879  |
| N | 1.53439097  | -0.81008183 | -0.00240121 |
| N | -1.63176003 | 0.96128717  | 0.00296179  |
| C | -4.90716603 | -0.83243583 | -0.00234721 |
| C | 4.93105697  | 0.74825517  | 0.00207979  |
| O | 5.51838297  | 1.80988317  | 0.00519979  |
| O | -5.37523903 | -1.94604483 | -0.00562921 |
| C | -7.08125803 | 0.13323317  | 0.00051779  |
| C | -7.69341803 | 1.51688117  | 0.00451879  |
| H | -7.36057703 | -0.44907283 | 0.88147279  |
| H | -7.36057803 | -0.44396983 | -0.88378821 |
| H | -7.38960103 | 2.07902617  | -0.88118721 |
| H | -8.78310203 | 1.43833617  | 0.00428979  |
| H | -7.38960503 | 2.07389717  | 0.89346079  |
| C | 7.01523197  | -0.39252683 | -0.00142421 |
| C | 7.52339497  | -1.82051983 | -0.00563621 |
| H | 7.34893597  | 0.15990517  | 0.88162879  |

|   |             |             |             |
|---|-------------|-------------|-------------|
| H | 7.34883197  | 0.16506717  | -0.88126621 |
| H | 7.17193897  | -2.35213983 | -0.89278421 |
| H | 8.61689497  | -1.83039783 | -0.00573221 |
| H | 7.17204797  | -2.35732383 | 0.87842779  |
| O | 5.57601697  | -0.45379383 | -0.00152121 |
| O | -5.63506603 | 0.30065317  | 0.00100179  |

The geometric structure coordinates of N under  $E_x = +3 \times 10^{-3}$  a.u.

|   |             |             |             |
|---|-------------|-------------|-------------|
| C | 0.72355200  | 0.15250200  | 0.00003100  |
| C | 2.88756300  | -0.70942800 | 0.00012100  |
| C | 3.45025900  | 0.57074000  | 0.00028300  |
| C | 2.60098300  | 1.67384600  | 0.00029200  |
| C | 1.21803100  | 1.49127300  | 0.00015300  |
| C | -0.71513100 | -0.15071700 | -0.00004400 |
| C | -1.21392900 | -1.48142100 | -0.00018900 |
| C | -2.59965100 | -1.65899500 | -0.00029100 |
| C | -3.44011300 | -0.55646400 | -0.00022800 |
| C | -2.87327600 | 0.72520400  | -0.00004900 |
| H | 3.51113900  | -1.59361300 | 0.00010000  |
| H | 3.00391800  | 2.67851600  | 0.00038800  |
| H | -3.01277800 | -2.65983000 | -0.00040600 |
| H | -3.49846300 | 1.60810100  | 0.00001400  |
| O | -0.42979800 | -2.56450200 | -0.00020700 |
| H | 0.50761500  | -2.23679500 | -0.00005200 |
| O | 0.42631700  | 2.56308800  | 0.00010400  |
| H | -0.51556300 | 2.22061000  | -0.00011200 |
| N | 1.57355700  | -0.89626600 | 0.00000500  |
| N | -1.55957400 | 0.90657500  | 0.00003900  |
| C | -4.91965100 | -0.79126900 | -0.00034400 |
| C | 4.91817800  | 0.79726300  | 0.00042600  |

|   |             |             |             |
|---|-------------|-------------|-------------|
| O | 5.45130400  | 1.88222300  | 0.00037100  |
| O | -5.41478800 | -1.89177500 | -0.00030700 |
| C | -7.06351600 | 0.23527200  | 0.00010400  |
| C | -7.63072300 | 1.63739200  | 0.00089100  |
| H | -7.35863200 | -0.33611900 | 0.88268600  |
| H | -7.35890500 | -0.33522300 | -0.88297100 |
| H | -7.30961800 | 2.18733500  | -0.88623700 |
| H | -8.72219900 | 1.59270600  | 0.00101400  |
| H | -7.30938000 | 2.18643000  | 0.88849500  |
| C | 7.05057200  | -0.24201500 | 0.00003000  |
| C | 7.61716400  | -1.64759400 | -0.00041800 |
| H | 7.35809000  | 0.32664600  | 0.88197800  |
| H | 7.35788800  | 0.32713100  | -0.88167400 |
| H | 7.28740800  | -2.19534300 | -0.88586100 |
| H | 8.71023200  | -1.61151500 | -0.00053100 |
| H | 7.28760900  | -2.19582900 | 0.88479900  |
| O | 5.61360000  | -0.36520000 | 0.00016600  |
| O | -5.60945200 | 0.35666200  | -0.00007500 |

The geometric structure coordinates of N\* under  $E_x = +3 \times 10^{-3}$  a.u.

|   |             |             |             |
|---|-------------|-------------|-------------|
| C | 0.71053000  | 0.19594300  | 0.00009600  |
| C | 2.87470300  | -0.68862900 | -0.00005800 |
| C | 3.46983500  | 0.60224500  | 0.00016000  |
| C | 2.61913500  | 1.72063500  | 0.00036500  |
| C | 1.23466600  | 1.53366800  | 0.00034400  |
| C | -0.69941200 | -0.09156900 | 0.00003700  |
| C | -1.20883600 | -1.45864500 | -0.00022100 |
| C | -2.58838300 | -1.66763400 | -0.00024700 |
| C | -3.44811200 | -0.56780400 | -0.00004000 |
| C | -2.88474800 | 0.72084300  | 0.00018600  |



|   |             |             |             |
|---|-------------|-------------|-------------|
| H | 3.50091200  | -1.57187600 | -0.00021600 |
| H | 3.02513000  | 2.72300000  | 0.00054600  |
| H | -2.98384600 | -2.67521400 | -0.00043300 |
| H | -3.52659800 | 1.59254700  | 0.00035200  |
| O | -0.38199400 | -2.48666200 | -0.00044600 |
| H | 0.57364400  | -2.09361100 | -0.00044700 |
| O | 0.43876800  | 2.59798400  | 0.00057300  |
| H | -0.50744100 | 2.25957600  | 0.00056800  |
| N | 1.57518500  | -0.87741200 | -0.00008900 |
| N | -1.56601400 | 0.94582100  | 0.00022300  |
| C | -4.91602700 | -0.80664200 | -0.00007400 |
| C | 4.91819500  | 0.79647000  | 0.00018300  |
| O | 5.48601900  | 1.87562300  | 0.00035100  |
| O | -5.40497400 | -1.91231800 | -0.00024000 |
| C | -7.06722000 | 0.20872500  | 0.00020600  |
| C | -7.64582200 | 1.60610400  | 0.00051100  |
| H | -7.35840500 | -0.36503800 | 0.88280100  |
| H | -7.35847200 | -0.36468100 | -0.88260000 |
| H | -7.32975100 | 2.15853800  | -0.88692600 |
| H | -8.73688000 | 1.55221200  | 0.00054100  |
| H | -7.32968500 | 2.15817800  | 0.88814800  |
| C | 7.03391500  | -0.28413800 | -0.00008500 |
| C | 7.59059400  | -1.69500700 | -0.00037500 |
| H | 7.35386900  | 0.28111300  | 0.88088400  |
| H | 7.35381600  | 0.28145500  | -0.88085400 |
| H | 7.25520300  | -2.24029400 | -0.88559600 |
| H | 8.68433700  | -1.67033800 | -0.00040300 |
| H | 7.25525600  | -2.24063700 | 0.88465500  |
| O | 5.60326800  | -0.39346800 | -0.00006300 |
| O | -5.61452400 | 0.34053700  | 0.00017600  |

The geometric structure coordinates of T1\* under  $E_x = +3 \times 10^{-3}$  a.u.

|   |             |             |             |
|---|-------------|-------------|-------------|
| C | 0.67957600  | 0.19592100  | -0.10261500 |
| C | 2.91148400  | -0.70268100 | -0.12733100 |
| C | 3.45960500  | 0.55676700  | 0.03408400  |
| C | 2.59628400  | 1.67916300  | 0.11978700  |
| C | 1.21659400  | 1.50316300  | 0.04789600  |
| C | -0.74291900 | -0.10528300 | -0.00325100 |
| C | -1.22201900 | -1.48458900 | 0.15317600  |
| C | -2.61473000 | -1.65127400 | 0.13344400  |
| C | -3.47468800 | -0.54688800 | 0.05188900  |
| C | -2.93108200 | 0.72800500  | -0.03020400 |
| H | 3.50951900  | -1.59723100 | -0.20980700 |
| H | 3.00551700  | 2.67476700  | 0.21368300  |
| H | -3.02352200 | -2.64409100 | 0.26590300  |
| H | -3.55127100 | 1.61337600  | -0.02570300 |
| O | -0.38047900 | -2.44806600 | 0.25126100  |
| H | 1.14861000  | -1.78071500 | -0.22592800 |
| O | 0.42250100  | 2.57239900  | 0.10817600  |
| H | -0.51415600 | 2.25743300  | -0.00689400 |
| N | 1.58281100  | -0.84593600 | -0.22985800 |
| N | -1.60274500 | 0.90432000  | -0.10817500 |
| C | -4.94685700 | -0.79039000 | 0.09480700  |
| C | 4.91767800  | 0.75650900  | 0.08645300  |
| O | 5.46440000  | 1.82908000  | 0.22899400  |
| O | -5.43413500 | -1.88802500 | 0.22475600  |
| C | -7.10142100 | 0.20943500  | 0.00474400  |
| C | -7.68574200 | 1.59635400  | -0.14768900 |
| H | -7.38194200 | -0.26070500 | 0.94981000  |
| H | -7.40046100 | -0.46060100 | -0.80419100 |

|   |             |             |             |
|---|-------------|-------------|-------------|
| H | -7.37874400 | 2.04540200  | -1.09464000 |
| H | -8.77663000 | 1.54043100  | -0.13157000 |
| H | -7.36322100 | 2.24629400  | 0.66855800  |
| C | 7.04189600  | -0.30359900 | 0.03128200  |
| C | 7.60375100  | -1.70373000 | -0.11682000 |
| H | 7.32353900  | 0.15307500  | 0.98446400  |
| H | 7.38509700  | 0.36314500  | -0.76502000 |
| H | 7.30365400  | -2.14014600 | -1.07214900 |
| H | 8.69633500  | -1.67698400 | -0.07499800 |
| H | 7.24169700  | -2.35084000 | 0.68522300  |
| O | 5.60791100  | -0.41365600 | -0.03241900 |
| O | -5.65041400 | 0.34591100  | -0.02663300 |

The geometric structure coordinates of T2\* under  $E_x = +3 \times 10^{-3}$  a.u.

|   |             |             |             |
|---|-------------|-------------|-------------|
| C | 0.74728400  | 0.19188400  | -0.05286800 |
| C | 2.92736600  | -0.66894800 | -0.08046600 |
| C | 3.50761200  | 0.59705300  | 0.00397400  |
| C | 2.65572500  | 1.71964800  | 0.06568000  |
| C | 1.26517500  | 1.56494400  | 0.07966200  |
| C | -0.66237600 | -0.10249100 | -0.14272400 |
| C | -1.18829700 | -1.42823100 | -0.03791400 |
| C | -2.56180800 | -1.61803700 | 0.05344500  |
| C | -3.44066300 | -0.51635100 | 0.01679600  |
| C | -2.91953500 | 0.75426500  | -0.12144500 |
| H | 3.53383100  | -1.56487100 | -0.07228800 |
| H | 3.06968700  | 2.71098300  | 0.18833100  |
| H | -2.95951700 | -2.62062800 | 0.13222300  |
| H | -3.53738400 | 1.63743300  | -0.18356800 |
| O | -0.38860700 | -2.49482600 | -0.01794900 |
| H | 0.54633400  | -2.16414400 | -0.10870400 |

|   |             |             |             |
|---|-------------|-------------|-------------|
| O | 0.43659500  | 2.54105400  | 0.14849800  |
| H | -1.18977900 | 1.86621500  | -0.24323000 |
| N | 1.60772900  | -0.83772400 | -0.15168600 |
| N | -1.58957800 | 0.92398300  | -0.23007100 |
| C | -4.90764600 | -0.76468300 | 0.08661500  |
| C | 4.96220600  | 0.79044000  | 0.06455600  |
| O | 5.52191300  | 1.86351600  | 0.16311900  |
| O | -5.38405400 | -1.86849900 | 0.19980100  |
| C | -7.06843500 | 0.23106000  | 0.07962700  |
| C | -7.66077200 | 1.61852100  | -0.02920400 |
| H | -7.32211300 | -0.25893300 | 1.02204700  |
| H | -7.38525100 | -0.42372300 | -0.73487800 |
| H | -7.38267500 | 2.08741300  | -0.97552200 |
| H | -8.75051700 | 1.55783900  | 0.01585800  |
| H | -7.31864800 | 2.25350600  | 0.79084800  |
| C | 7.08011400  | -0.28254300 | 0.05068900  |
| C | 7.63522400  | -1.69119300 | -0.03185100 |
| H | 7.36854900  | 0.21764600  | 0.97999800  |
| H | 7.42657300  | 0.34340400  | -0.77710200 |
| H | 7.32835100  | -2.17147700 | -0.96370800 |
| H | 8.72828400  | -1.66887800 | 0.00486500  |
| H | 7.27196100  | -2.29710900 | 0.80127300  |
| O | 5.64770300  | -0.38907200 | -0.00442200 |
| O | -5.61786100 | 0.37290400  | 0.01418700  |

The geometric structure coordinates of T3\* in under  $E_x = +3 \times 10^{-3}$  a.u.

|   |            |             |             |
|---|------------|-------------|-------------|
| C | 0.69424200 | 0.22050600  | 0.00017700  |
| C | 2.92154200 | -0.67258900 | -0.00032600 |
| C | 3.48824000 | 0.60853100  | -0.00018600 |
| C | 2.64059300 | 1.72632000  | 0.00015600  |

|   |             |             |             |
|---|-------------|-------------|-------------|
| C | 1.22323200  | 1.58921400  | 0.00039000  |
| C | -0.68101400 | -0.11250800 | 0.00020700  |
| C | -1.18046300 | -1.49258200 | 0.00006700  |
| C | -2.59351200 | -1.65451900 | 0.00035800  |
| C | -3.45750000 | -0.55830600 | 0.00065000  |
| C | -2.92961100 | 0.73193300  | 0.00066700  |
| H | 3.51773100  | -1.57259700 | -0.00053900 |
| H | 3.05635200  | 2.72498100  | 0.00031600  |
| H | -2.99663400 | -2.65888600 | 0.00029700  |
| H | -3.54879000 | 1.61652300  | 0.00080700  |
| O | -0.37661200 | -2.47291300 | -0.00026700 |
| H | 1.11398000  | -1.75704700 | -0.00028900 |
| O | 0.43864800  | 2.58144300  | 0.00079500  |
| H | -1.16078900 | 1.85227100  | 0.00060400  |
| N | 1.59768800  | -0.82396100 | -0.00014000 |
| N | -1.60027800 | 0.91209700  | 0.00043700  |
| C | -4.93026400 | -0.79661800 | 0.00089200  |
| C | 4.94855300  | 0.79044600  | -0.00036000 |
| O | 5.51814500  | 1.86198300  | -0.00019600 |
| O | -5.42220400 | -1.89862000 | 0.00083100  |
| C | -7.07962500 | 0.22496800  | 0.00132200  |
| C | -7.65437200 | 1.62405500  | 0.00091400  |
| H | -7.37233900 | -0.34709900 | 0.88434500  |
| H | -7.37250600 | -0.34767800 | -0.88126100 |
| H | -7.33703400 | 2.17518600  | -0.88695300 |
| H | -8.74558900 | 1.57343600  | 0.00100800  |
| H | -7.33690600 | 2.17576900  | 0.88837000  |
| C | 7.05421500  | -0.31055800 | -0.00085000 |
| C | 7.59194200  | -1.72814100 | -0.00137400 |
| H | 7.37800800  | 0.25066900  | 0.88067000  |

|   |             |             |             |
|---|-------------|-------------|-------------|
| H | 7.37774100  | 0.25121900  | -0.88211400 |
| H | 7.25071900  | -2.26911400 | -0.88690500 |
| H | 8.68567700  | -1.71624100 | -0.00160500 |
| H | 7.25109500  | -2.26964700 | 0.88397600  |
| O | 5.61877300  | -0.40162900 | -0.00066300 |
| O | -5.62637900 | 0.35309700  | 0.00114500  |

The geometric structure coordinates of TS\* of N\*-T1\* path under  $E_x = +3 \times 10^{-3}$  a.u.

|   |             |             |             |
|---|-------------|-------------|-------------|
| C | 0.70227317  | 0.25619175  | -0.00459952 |
| C | 2.85212817  | -0.69734325 | 0.01049348  |
| C | 3.46696417  | 0.57747775  | -0.01296052 |
| C | 2.63646017  | 1.71703875  | -0.03261252 |
| C | 1.24800617  | 1.56821775  | -0.02864152 |
| C | -0.72578683 | -0.03719425 | 0.00131248  |
| C | -1.19446983 | -1.42097725 | 0.02532448  |
| C | -2.57636883 | -1.64837225 | 0.03030848  |
| C | -3.45345183 | -0.55712525 | 0.01222848  |
| C | -2.91741283 | 0.73187975  | -0.01048652 |
| H | 3.44458217  | -1.60188325 | 0.02622648  |
| H | 3.07017817  | 2.70755875  | -0.05069152 |
| H | -2.95903583 | -2.66076725 | 0.04779248  |
| H | -3.56758683 | 1.59644075  | -0.02511152 |
| O | -0.32706583 | -2.39495925 | 0.04122548  |
| H | 0.72150817  | -1.86612025 | 0.03254148  |
| O | 0.47363817  | 2.65462575  | -0.04739152 |
| H | -0.47168183 | 2.34843075  | -0.04086852 |
| N | 1.54336717  | -0.83103525 | 0.01421548  |
| N | -1.58528483 | 0.98028875  | -0.01565652 |
| C | -4.92060183 | -0.82142525 | 0.01771448  |
| C | 4.91848717  | 0.74190375  | -0.01709952 |

|   |             |             |             |
|---|-------------|-------------|-------------|
| O | 5.50864517  | 1.80906675  | -0.03681352 |
| O | -5.38789983 | -1.93541425 | 0.03634848  |
| C | -7.08965283 | 0.15499575  | 0.00331248  |
| C | -7.69121983 | 1.54235675  | -0.02109652 |
| H | -7.37016283 | -0.40724425 | 0.89653348  |
| H | -7.37127683 | -0.43881725 | -0.86892952 |
| H | -7.38466283 | 2.08392875  | -0.91847452 |
| H | -8.78121983 | 1.47029475  | -0.01949152 |
| H | -7.38413583 | 2.11539875  | 0.85633948  |
| C | 7.01071917  | -0.38421425 | 0.00157948  |
| C | 7.53715117  | -1.80639125 | 0.02881048  |
| H | 7.34337117  | 0.19109975  | 0.87121348  |
| H | 7.34217317  | 0.15684775  | -0.89023852 |
| H | 7.18965117  | -2.36171325 | -0.84543952 |
| H | 8.63114717  | -1.80516125 | 0.02795148  |
| H | 7.19099617  | -2.32729025 | 0.92451848  |
| O | 5.57808417  | -0.46283325 | 0.00406748  |
| O | -5.63863483 | 0.31144675  | -0.00037052 |

The geometric structure coordinates of TS\* of T1\*-T3\* path under  $E_x = +3 \times 10^{-3}$  a.u.

|   |             |             |             |
|---|-------------|-------------|-------------|
| C | 0.69943299  | 0.09531215  | -0.00008819 |
| C | 2.93679299  | -0.72902885 | -0.00045819 |
| C | 3.45270599  | 0.57612615  | -0.00047219 |
| C | 2.56350799  | 1.66688715  | -0.00029019 |
| C | 1.16846799  | 1.45800215  | -0.00009619 |
| C | -0.70227201 | -0.22068385 | 0.00010581  |
| C | -1.22050801 | -1.58565085 | 0.00013181  |
| C | -2.63150801 | -1.70737285 | 0.00032981  |
| C | -3.45253701 | -0.57001685 | 0.00048881  |
| C | -2.87257601 | 0.69643115  | 0.00045281  |

|   |             |             |             |
|---|-------------|-------------|-------------|
| H | 3.56787499  | -1.60448685 | -0.00059519 |
| H | 2.94636599  | 2.67845815  | -0.00030219 |
| H | -3.07589001 | -2.69426085 | 0.00035881  |
| H | -3.46664601 | 1.59889915  | 0.00057081  |
| O | -0.41421601 | -2.57205885 | -0.00001919 |
| H | 1.16452099  | -1.86193485 | -0.00024319 |
| O | 0.31271699  | 2.42948015  | 0.00007281  |
| H | -0.78505801 | 1.85836115  | 0.00020181  |
| N | 1.62313299  | -0.92247385 | -0.00027219 |
| N | -1.53011001 | 0.84563015  | 0.00026581  |
| C | -4.93260101 | -0.75810585 | 0.00069581  |
| C | 4.90300499  | 0.81892115  | -0.00067619 |
| O | 5.42734599  | 1.91464715  | -0.00069319 |
| O | -5.46132301 | -1.84372085 | 0.00074481  |
| C | -7.04787901 | 0.32968315  | 0.00101481  |
| C | -7.57844801 | 1.74624915  | 0.00111481  |
| H | -7.35910301 | -0.23310285 | 0.88372881  |
| H | -7.35934501 | -0.23306785 | -0.88163719 |
| H | -7.24336201 | 2.28732015  | -0.88641219 |
| H | -8.67074501 | 1.73030515  | 0.00126381  |
| H | -7.24311901 | 2.28728515  | 0.88857081  |
| C | 7.05171999  | -0.19512985 | -0.00106619 |
| C | 7.64746399  | -1.58930585 | -0.00123419 |
| H | 7.35206799  | 0.37922415  | 0.88029281  |
| H | 7.35179099  | 0.37931715  | -0.88245919 |
| H | 7.32895799  | -2.14406785 | -0.88672019 |
| H | 8.73974899  | -1.53221485 | -0.00140319 |
| H | 7.32923699  | -2.14416285 | 0.88429181  |
| O | 5.62122899  | -0.34520685 | -0.00085019 |
| O | -5.59213901 | 0.41251315  | 0.00081681  |



The geometric structure coordinates of TS\* of N\*-T2\* path under  $E_x = +3 \times 10^{-3}$  a.u.

|   |             |             |             |
|---|-------------|-------------|-------------|
| C | 0.71096544  | 0.08424195  | 0.00000989  |
| C | 2.89413444  | -0.70956105 | -0.00018411 |
| C | 3.45005744  | 0.59723695  | 0.00008689  |
| C | 2.57268044  | 1.69236695  | 0.00032989  |
| C | 1.18846044  | 1.46337695  | 0.00029789  |
| C | -0.68283256 | -0.20410705 | -0.00003511 |
| C | -1.22577556 | -1.53626805 | -0.00031011 |
| C | -2.60954456 | -1.69534305 | -0.00032811 |
| C | -3.44129056 | -0.56803405 | -0.00008011 |
| C | -2.85349256 | 0.70963195  | 0.00018289  |
| H | 3.55219444  | -1.56951305 | -0.00037511 |
| H | 2.94893844  | 2.70643195  | 0.00054089  |
| H | -3.04138356 | -2.68771205 | -0.00053311 |
| H | -3.46516556 | 1.60193795  | 0.00037889  |
| O | -0.43279656 | -2.60231105 | -0.00054411 |
| H | 0.51373344  | -2.26805505 | -0.00048511 |
| O | 0.32666944  | 2.44128495  | 0.00051589  |
| H | -0.72453656 | 1.91704995  | 0.00041589  |
| N | 1.59473844  | -0.95790305 | -0.00022111 |
| N | -1.53767856 | 0.87229295  | 0.00020189  |
| C | -4.91289156 | -0.76753805 | -0.00010511 |
| C | 4.89630944  | 0.82800495  | 0.00011789  |
| O | 5.43239144  | 1.92124695  | 0.00034389  |
| O | -5.43437456 | -1.85883505 | -0.00033011 |
| C | -7.03636056 | 0.30506195  | 0.00014689  |
| C | -7.57898056 | 1.71702895  | 0.00045089  |
| H | -7.34330556 | -0.26076105 | 0.88258889  |
| H | -7.34332656 | -0.26038905 | -0.88252511 |

|   |             |             |             |
|---|-------------|-------------|-------------|
| H | -7.24849356 | 2.26113995  | -0.88695111 |
| H | -8.67109556 | 1.69175895  | 0.00045889  |
| H | -7.24847256 | 2.26076595  | 0.88807489  |
| C | 7.03968044  | -0.19610205 | -0.00012711 |
| C | 7.63106444  | -1.59252905 | -0.00043011 |
| H | 7.34396944  | 0.37704695  | 0.88103789  |
| H | 7.34394544  | 0.37741995  | -0.88105911 |
| H | 7.30978644  | -2.14599505 | -0.88575711 |
| H | 8.72374244  | -1.54002505 | -0.00043311 |
| H | 7.30980944  | -2.14637005 | 0.88467089  |
| O | 5.61084744  | -0.34143705 | -0.00013911 |
| O | -5.58184056 | 0.39953795  | 0.00014989  |

The geometric structure coordinates of TS\* of T2\*-T3\* path under  $E_x = +3 \times 10^{-3}$  a.u.

|   |             |             |             |
|---|-------------|-------------|-------------|
| C | 0.69161643  | 0.27832009  | 0.00000927  |
| C | 2.86021743  | -0.66145291 | 0.00110027  |
| C | 3.46905343  | 0.60596109  | 0.00046027  |
| C | 2.65155843  | 1.74944109  | -0.00042773 |
| C | 1.23607343  | 1.63599509  | -0.00067273 |
| C | -0.69213157 | -0.03939091 | -0.00022973 |
| C | -1.15625957 | -1.41300291 | 0.00045127  |
| C | -2.54794057 | -1.63158091 | 0.00030827  |
| C | -3.44381457 | -0.55623491 | -0.00051673 |
| C | -2.95395357 | 0.74905109  | -0.00119673 |
| H | 3.44611143  | -1.56985591 | 0.00182727  |
| H | 3.09238443  | 2.73726109  | -0.00088173 |
| H | -2.92449157 | -2.64606091 | 0.00079827  |
| H | -3.60107257 | 1.61346709  | -0.00188073 |
| O | -0.29936457 | -2.38204391 | 0.00115627  |
| H | 0.80990643  | -1.79892591 | 0.00116227  |

|   |             |             |             |
|---|-------------|-------------|-------------|
| O | 0.45117743  | 2.63406909  | -0.00146573 |
| H | -1.21722057 | 1.91283409  | -0.00148773 |
| N | 1.53592243  | -0.80112791 | 0.00087627  |
| N | -1.63362557 | 0.96624709  | -0.00105573 |
| C | -4.90804757 | -0.83907491 | -0.00069373 |
| C | 4.93079443  | 0.75057409  | 0.00074927  |
| O | 5.52886643  | 1.80827709  | 0.00022627  |
| O | -5.36437857 | -1.95672091 | -0.00016873 |
| C | -7.08794757 | 0.11614609  | -0.00170973 |
| C | -7.70475057 | 1.49708009  | -0.00268473 |
| H | -7.36291057 | -0.46435691 | 0.88148727  |
| H | -7.36251757 | -0.46542991 | -0.88432173 |
| H | -7.40433257 | 2.05735509  | -0.89068173 |
| H | -8.79388857 | 1.41309609  | -0.00286973 |
| H | -7.40471957 | 2.05843409  | 0.88476227  |
| C | 7.01000343  | -0.39919291 | 0.00203527  |
| C | 7.51582643  | -1.82869891 | 0.00315327  |
| H | 7.34728243  | 0.15527709  | 0.88297227  |
| H | 7.34775843  | 0.15406709  | -0.87948073 |
| H | 7.16236043  | -2.36266791 | -0.88183973 |
| H | 8.60963143  | -1.84202391 | 0.00345127  |
| H | 7.16189343  | -2.36144691 | 0.88869527  |
| O | 5.57412843  | -0.45802391 | 0.00168927  |
| O | -5.63866457 | 0.28820609  | -0.00148973 |

The geometric structure coordinates of N under  $E_Y = +3 \times 10^{-3}$  a.u.

|   |            |             |             |
|---|------------|-------------|-------------|
| C | 0.72561200 | 0.16534300  | 0.00016500  |
| C | 2.88630500 | -0.70407800 | -0.00000400 |
| C | 3.45130000 | 0.57604600  | 0.00010100  |
| C | 2.60535000 | 1.67911700  | 0.00028000  |

|   |             |             |             |
|---|-------------|-------------|-------------|
| C | 1.22248000  | 1.49948400  | 0.00034500  |
| C | -0.71365300 | -0.13887200 | 0.00007400  |
| C | -1.20853100 | -1.47409100 | -0.00007700 |
| C | -2.59440200 | -1.65540500 | -0.00008100 |
| C | -3.43824700 | -0.55343000 | 0.00002000  |
| C | -2.87506300 | 0.72827400  | 0.00010600  |
| H | 3.50857700  | -1.58900000 | -0.00012700 |
| H | 3.01493600  | 2.68116100  | 0.00040800  |
| H | -3.00017700 | -2.65924300 | -0.00018900 |
| H | -3.50172400 | 1.61023000  | 0.00016600  |
| O | -0.42623100 | -2.55130300 | -0.00025900 |
| H | 0.51494300  | -2.22724400 | -0.00035600 |
| O | 0.42901000  | 2.57788700  | 0.00063000  |
| H | -0.50853300 | 2.23259500  | 0.00082500  |
| N | 1.57193000  | -0.88639900 | 0.00002500  |
| N | -1.56151400 | 0.91462600  | 0.00012800  |
| C | -4.91164200 | -0.78771600 | 0.00000400  |
| C | 4.92568300  | 0.80328100  | 0.00005900  |
| O | 5.44240400  | 1.89737900  | 0.00017300  |
| O | -5.42333600 | -1.87917900 | -0.00013600 |
| C | -7.05400300 | 0.22557300  | -0.00001300 |
| C | -7.63935500 | 1.62220500  | 0.00057300  |
| H | -7.34982900 | -0.34832800 | 0.88131100  |
| H | -7.34985600 | -0.34758300 | -0.88181800 |
| H | -7.32003300 | 2.17491400  | -0.88604100 |
| H | -8.73093200 | 1.56711700  | 0.00053600  |
| H | -7.32005600 | 2.17415300  | 0.88766900  |
| C | 7.05784800  | -0.25162600 | -0.00006500 |
| C | 7.60342000  | -1.66361200 | -0.00044300 |
| H | 7.36568700  | 0.31383000  | 0.88311100  |

|   |             |             |             |
|---|-------------|-------------|-------------|
| H | 7.36562700  | 0.31428900  | -0.88296600 |
| H | 7.27044200  | -2.20784000 | -0.88635700 |
| H | 8.69599700  | -1.64045700 | -0.00047300 |
| H | 7.27050300  | -2.20829500 | 0.88521500  |
| O | 5.61017400  | -0.35173100 | -0.00003600 |
| O | -5.61127700 | 0.36752800  | 0.00001100  |

The geometric structure coordinates of N\* under  $E_Y = +3 \times 10^{-3}$  a.u.

|   |             |             |             |
|---|-------------|-------------|-------------|
| C | 0.70462700  | 0.16329900  | -0.00005400 |
| C | 2.87797000  | -0.69596300 | -0.00021400 |
| C | 3.45875700  | 0.59709100  | -0.00022400 |
| C | 2.60482800  | 1.70801600  | -0.00011700 |
| C | 1.22457900  | 1.51411900  | -0.00001800 |
| C | -0.69290800 | -0.12260000 | -0.00001700 |
| C | -1.21029700 | -1.48331700 | -0.00005600 |
| C | -2.59120600 | -1.68714400 | 0.00000100  |
| C | -3.44739700 | -0.57941700 | 0.00007300  |
| C | -2.87347300 | 0.71151800  | 0.00007900  |
| H | 3.51295000  | -1.57299000 | -0.00028900 |
| H | 3.00936900  | 2.71126800  | -0.00010100 |
| H | -2.98722300 | -2.69418500 | -0.00002300 |
| H | -3.51512600 | 1.58378900  | 0.00013300  |
| O | -0.39537700 | -2.52005700 | -0.00017700 |
| H | 0.55924100  | -2.15006900 | -0.00028200 |
| O | 0.41262400  | 2.56548000  | 0.00013200  |
| H | -0.53431000 | 2.19774000  | 0.00032100  |
| N | 1.57550400  | -0.90033700 | -0.00013800 |
| N | -1.56659000 | 0.93139900  | 0.00003800  |
| C | -4.90569200 | -0.79873700 | 0.00013300  |
| C | 4.91615000  | 0.80819300  | -0.00032800 |

|   |             |             |             |
|---|-------------|-------------|-------------|
| O | 5.44959900  | 1.90119800  | -0.00015300 |
| O | -5.43089600 | -1.88930300 | 0.00016300  |
| C | -7.04336300 | 0.23084900  | 0.00037700  |
| C | -7.62646400 | 1.62900200  | 0.00055800  |
| H | -7.34376100 | -0.34188100 | 0.88145500  |
| H | -7.34392700 | -0.34172100 | -0.88074900 |
| H | -7.30580200 | 2.18092700  | -0.88626800 |
| H | -8.71829100 | 1.57718100  | 0.00065400  |
| H | -7.30563900 | 2.18076500  | 0.88742600  |
| C | 7.04298700  | -0.26220000 | -0.00005700 |
| C | 7.58889400  | -1.67474700 | 0.00004200  |
| H | 7.35557300  | 0.30302200  | 0.88234800  |
| H | 7.35574400  | 0.30296600  | -0.88243600 |
| H | 7.25527800  | -2.21925100 | -0.88566700 |
| H | 8.68162700  | -1.65338400 | 0.00015000  |
| H | 7.25510300  | -2.21919500 | 0.88571900  |
| O | 5.59984100  | -0.36033000 | -0.00019500 |
| O | -5.60367100 | 0.36860700  | 0.00025300  |

The geometric structure coordinates of T1\* under  $E_Y = +3 \times 10^{-3}$  a.u.

|   |             |             |             |
|---|-------------|-------------|-------------|
| C | 0.67081800  | 0.13660100  | -0.09588400 |
| C | 2.92878800  | -0.72936800 | -0.11484100 |
| C | 3.45756500  | 0.53540200  | 0.01801800  |
| C | 2.57652000  | 1.64616700  | 0.07167700  |
| C | 1.20507600  | 1.45834100  | 0.00678200  |
| C | -0.74203200 | -0.15052500 | -0.01643900 |
| C | -1.25955500 | -1.51811500 | 0.11930800  |
| C | -2.64095100 | -1.67584200 | 0.10404600  |
| C | -3.48984600 | -0.55426700 | 0.03247800  |
| C | -2.92694000 | 0.71034000  | -0.05438300 |

|   |             |             |             |
|---|-------------|-------------|-------------|
| H | 3.53733400  | -1.61824100 | -0.18315500 |
| H | 2.97656000  | 2.64690200  | 0.15139600  |
| H | -3.05883500 | -2.66682300 | 0.21398600  |
| H | -3.53702700 | 1.60301300  | -0.07025100 |
| O | -0.41219000 | -2.48536100 | 0.20836600  |
| H | 1.21300500  | -1.83643100 | -0.25394300 |
| O | 0.40028200  | 2.52608000  | 0.04718600  |
| H | -0.53416300 | 2.19042800  | -0.03862900 |
| N | 1.59582800  | -0.89325400 | -0.19991700 |
| N | -1.60458000 | 0.87216100  | -0.11113900 |
| C | -4.95370700 | -0.77529900 | 0.07383600  |
| C | 4.91796500  | 0.76492200  | 0.07397600  |
| O | 5.42647200  | 1.85952400  | 0.18350100  |
| O | -5.47638100 | -1.85992700 | 0.17461000  |
| C | -7.09332300 | 0.24310700  | 0.01718400  |
| C | -7.67918500 | 1.63696500  | -0.07556400 |
| H | -7.37974300 | -0.26446200 | 0.94157200  |
| H | -7.40483700 | -0.39153200 | -0.81614300 |
| H | -7.37067900 | 2.12410700  | -1.00357500 |
| H | -8.77084200 | 1.58399600  | -0.05780200 |
| H | -7.34795000 | 2.25117200  | 0.76522700  |
| C | 7.06268100  | -0.26771600 | 0.05269000  |
| C | 7.63147100  | -1.66522800 | -0.07231300 |
| H | 7.33488000  | 0.20775500  | 0.99857200  |
| H | 7.39216700  | 0.38868000  | -0.75684700 |
| H | 7.33789600  | -2.12018600 | -1.02053400 |
| H | 8.72291800  | -1.62858600 | -0.03145700 |
| H | 7.27845600  | -2.30225100 | 0.74111300  |
| O | 5.61942200  | -0.38526200 | -0.00610900 |
| O | -5.65368000 | 0.38316500  | -0.01410400 |

The geometric structure coordinates of T2\* under  $E_Y = +3 \times 10^{-3}$  a.u.

|   |             |             |             |
|---|-------------|-------------|-------------|
| C | 0.75076800  | 0.14973800  | 0.00046500  |
| C | 2.93268400  | -0.68384500 | 0.02979000  |
| C | 3.49233700  | 0.58991600  | -0.02724700 |
| C | 2.63247700  | 1.69881800  | -0.09821600 |
| C | 1.23470600  | 1.53240100  | -0.13504800 |
| C | -0.67126500 | -0.16133800 | 0.08802100  |
| C | -1.19905000 | -1.47356600 | -0.03649800 |
| C | -2.58374800 | -1.65616900 | -0.10210700 |
| C | -3.44495400 | -0.54188900 | -0.03205900 |
| C | -2.90446700 | 0.72627800  | 0.10828500  |
| H | 3.54936300  | -1.57202800 | 0.01389800  |
| H | 3.04052000  | 2.69449700  | -0.21124000 |
| H | -2.98931100 | -2.65532300 | -0.18030100 |
| H | -3.51342900 | 1.61453000  | 0.18240800  |
| O | -0.41101500 | -2.54238200 | -0.08649600 |
| H | 0.52789700  | -2.22899500 | 0.01470100  |
| O | 0.40879600  | 2.50548400  | -0.23936700 |
| H | -1.12772800 | 1.81430400  | 0.15340000  |
| N | 1.60177700  | -0.87229300 | 0.09140800  |
| N | -1.57756600 | 0.88179300  | 0.19936700  |
| C | -4.91018600 | -0.76026000 | -0.07534700 |
| C | 4.95793000  | 0.80833600  | -0.05861800 |
| O | 5.48171300  | 1.89839400  | -0.14574600 |
| O | -5.42798400 | -1.84453400 | -0.19298400 |
| C | -7.04926900 | 0.26487800  | -0.01921600 |
| C | -7.63112000 | 1.65873700  | 0.09297400  |
| H | -7.36659900 | -0.38291500 | 0.80151800  |
| H | -7.32968000 | -0.22632000 | -0.95409100 |



|   |             |             |             |
|---|-------------|-------------|-------------|
| H | -7.29262900 | 2.28625200  | -0.73501500 |
| H | -8.72262100 | 1.60905800  | 0.06622000  |
| H | -7.32915900 | 2.12909000  | 1.03176200  |
| C | 7.09009200  | -0.24758500 | -0.00327700 |
| C | 7.63955300  | -1.65402400 | 0.10985000  |
| H | 7.41036100  | 0.39094800  | 0.82424600  |
| H | 7.38853200  | 0.24090400  | -0.93468600 |
| H | 7.29726000  | -2.27230700 | -0.72240800 |
| H | 8.73210600  | -1.63053800 | 0.09484800  |
| H | 7.31764400  | -2.12177800 | 1.04246000  |
| O | 5.64560400  | -0.34921900 | 0.02331900  |
| O | -5.60778200 | 0.39914600  | 0.02351000  |

The geometric structure coordinates of T3\* in under  $E_Y = +3 \times 10^{-3}$  a.u.

|   |             |             |             |
|---|-------------|-------------|-------------|
| C | 0.69230800  | 0.17649900  | -0.00019700 |
| C | 2.92779000  | -0.69564600 | -0.00007300 |
| C | 3.47387400  | 0.59165400  | -0.00001300 |
| C | 2.61745800  | 1.69898000  | -0.00005300 |
| C | 1.20306900  | 1.55094500  | -0.00022200 |
| C | -0.68150000 | -0.15511100 | -0.00005100 |
| C | -1.19522500 | -1.53013400 | 0.00000000  |
| C | -2.60949800 | -1.68313100 | 0.00014500  |
| C | -3.46320800 | -0.57288500 | 0.00019200  |
| C | -2.91938600 | 0.71143500  | 0.00014600  |
| H | 3.53562200  | -1.58808000 | -0.00008900 |
| H | 3.02894800  | 2.69953600  | -0.00003100 |
| H | -3.01852500 | -2.68490100 | 0.00022800  |
| H | -3.52928900 | 1.60214300  | 0.00015400  |
| O | -0.39559300 | -2.51022400 | -0.00007000 |
| H | 1.13655900  | -1.79705600 | -0.00015800 |

|   |             |             |             |
|---|-------------|-------------|-------------|
| O | 0.40634100  | 2.53898100  | -0.00030100 |
| H | -1.12091100 | 1.81543300  | -0.00002400 |
| N | 1.60319700  | -0.86047100 | -0.00018000 |
| N | -1.59000200 | 0.88110200  | 0.00001700  |
| C | -4.93052100 | -0.78532500 | 0.00028300  |
| C | 4.94086200  | 0.79954900  | 0.00007100  |
| O | 5.47333200  | 1.88826400  | 0.00014600  |
| O | -5.45908200 | -1.87031300 | 0.00022800  |
| C | -7.06232600 | 0.25738000  | 0.00046700  |
| C | -7.63514800 | 1.65955300  | 0.00037800  |
| H | -7.36546700 | -0.31292900 | 0.88187700  |
| H | -7.36548600 | -0.31302400 | -0.88086800 |
| H | -7.31078900 | 2.20922400  | -0.88649600 |
| H | -8.72724200 | 1.61501500  | -0.00010100 |
| H | -7.31153800 | 2.20908900  | 0.88760100  |
| C | 7.06411600  | -0.27987000 | 0.00011000  |
| C | 7.60128400  | -1.69541900 | -0.00033500 |
| H | 7.37780100  | 0.28310900  | 0.88311600  |
| H | 7.37789900  | 0.28373100  | -0.88246000 |
| H | 7.26496000  | -2.23787300 | -0.88625000 |
| H | 8.69402600  | -1.67964500 | -0.00090700 |
| H | 7.26588100  | -2.23820700 | 0.88572400  |
| O | 5.61784500  | -0.36962300 | 0.00005500  |
| O | -5.62005100 | 0.38499300  | 0.00042900  |

The geometric structure coordinates of N under  $E_z = +3 \times 10^{-3}$  a.u.

|   |            |             |            |
|---|------------|-------------|------------|
| C | 0.72021500 | 0.14973900  | 0.21426300 |
| C | 2.87786400 | -0.72416300 | 0.15246300 |
| C | 3.44589900 | 0.55463000  | 0.17707600 |
| C | 2.60497400 | 1.65888200  | 0.22956500 |

|   |             |             |             |
|---|-------------|-------------|-------------|
| C | 1.22019000  | 1.48243000  | 0.23873300  |
| C | -0.72021500 | -0.14975800 | 0.21423700  |
| C | -1.22016500 | -1.48246400 | 0.23831900  |
| C | -2.60494600 | -1.65894000 | 0.22915200  |
| C | -3.44589300 | -0.55468700 | 0.17702500  |
| C | -2.87788100 | 0.72412300  | 0.15277200  |
| H | 3.49934500  | -1.60865900 | 0.10875000  |
| H | 3.01572400  | 2.66035700  | 0.24720200  |
| H | -3.01567600 | -2.66042800 | 0.24649900  |
| H | -3.49938100 | 1.60862100  | 0.10934300  |
| O | -0.43506900 | -2.56203400 | 0.27306300  |
| H | 0.50449200  | -2.23120000 | 0.22669700  |
| O | 0.43512000  | 2.56200800  | 0.27384600  |
| H | -0.50445100 | 2.23120600  | 0.22743900  |
| N | 1.56366400  | -0.90512800 | 0.18064200  |
| N | -1.56368300 | 0.90510400  | 0.18095800  |
| C | -4.92037500 | -0.78101400 | 0.14612500  |
| C | 4.92038500  | 0.78093900  | 0.14619000  |
| O | 5.44200400  | 1.86142800  | 0.28629100  |
| O | -5.44197000 | -1.86155100 | 0.28593200  |
| C | -7.04315200 | 0.23808300  | -0.16449900 |
| C | -7.58914900 | 1.61867000  | -0.46049200 |
| H | -7.42598100 | -0.17007000 | 0.77463200  |
| H | -7.27458900 | -0.47739200 | -0.95672000 |
| H | -7.17934100 | 2.00282200  | -1.39652500 |
| H | -8.67716900 | 1.57584400  | -0.55367600 |
| H | -7.33643300 | 2.31674800  | 0.34095500  |
| C | 7.04313000  | -0.23810300 | -0.16483000 |
| C | 7.58908800  | -1.61861000 | -0.46126900 |
| H | 7.42600800  | 0.16975400  | 0.77441000  |

|   |             |             |             |
|---|-------------|-------------|-------------|
| H | 7.27454700  | 0.47761100  | -0.95684200 |
| H | 7.17923200  | -2.00246800 | -1.39740300 |
| H | 8.67710500  | -1.57577700 | -0.55448700 |
| H | 7.33639200  | -2.31692900 | 0.33997300  |
| O | 5.60094400  | -0.36109100 | -0.06181000 |
| O | -5.60096300 | 0.36106900  | -0.06150400 |

The geometric structure coordinates of N\* under  $E_z = +3 \times 10^{-3}$  a.u.

|   |             |             |            |
|---|-------------|-------------|------------|
| C | 0.69856800  | 0.14141400  | 0.11994000 |
| C | 2.87408600  | -0.70834800 | 0.08732700 |
| C | 3.45356000  | 0.58266100  | 0.11567000 |
| C | 2.60049400  | 1.69287300  | 0.14732900 |
| C | 1.21967200  | 1.49635700  | 0.14017100 |
| C | -0.69856900 | -0.14154500 | 0.11990800 |
| C | -1.21970100 | -1.49649000 | 0.13968600 |
| C | -2.60052800 | -1.69297800 | 0.14682600 |
| C | -3.45357100 | -0.58273700 | 0.11557500 |
| C | -2.87407100 | 0.70826800  | 0.08765100 |
| H | 3.51120600  | -1.58326800 | 0.05372000 |
| H | 3.00228400  | 2.69723500  | 0.16152800 |
| H | -3.00233800 | -2.69733700 | 0.16069200 |
| H | -3.51117400 | 1.58321200  | 0.05436500 |
| O | -0.40800000 | -2.54153100 | 0.16010500 |
| H | 0.54290200  | -2.17513800 | 0.12514800 |
| O | 0.40794300  | 2.54137300  | 0.16099400 |
| H | -0.54294900 | 2.17497400  | 0.12598300 |
| N | 1.56951700  | -0.91896200 | 0.10010600 |
| N | -1.56949600 | 0.91885300  | 0.10046200 |
| C | -4.91182100 | -0.79555100 | 0.11028300 |
| C | 4.91180500  | 0.79550600  | 0.11040100 |

|   |             |             |             |
|---|-------------|-------------|-------------|
| O | 5.44336500  | 1.88229500  | 0.20496800  |
| O | -5.44340000 | -1.88235900 | 0.20450300  |
| C | -7.03880600 | 0.24643700  | -0.09198100 |
| C | -7.59544500 | 1.64055200  | -0.29255100 |
| H | -7.40285500 | -0.21776000 | 0.82903100  |
| H | -7.29142500 | -0.42125700 | -0.91934600 |
| H | -7.20942700 | 2.08082400  | -1.21406700 |
| H | -8.68552400 | 1.60076200  | -0.36121200 |
| H | -7.32359200 | 2.29102600  | 0.54227300  |
| C | 7.03880400  | -0.24637200 | -0.09229700 |
| C | 7.59546000  | -1.64040900 | -0.29336400 |
| H | 7.40287900  | 0.21751700  | 0.82886000  |
| H | 7.29138100  | 0.42160900  | -0.91944300 |
| H | 7.20941700  | -2.08037300 | -1.21501500 |
| H | 8.68553600  | -1.60057600 | -0.36205100 |
| H | 7.32365000  | -2.29117200 | 0.54124800  |
| O | 5.59903000  | -0.36701800 | -0.01561600 |
| O | -5.59902700 | 0.36703200  | -0.01531200 |

The geometric structure coordinates of T1\* under  $E_z = +3 \times 10^{-3}$  a.u.

|   |             |             |             |
|---|-------------|-------------|-------------|
| C | 0.67535600  | 0.20050000  | 0.09618700  |
| C | 2.89544700  | -0.71556500 | -0.05209900 |
| C | 3.45206400  | 0.52664900  | 0.18232400  |
| C | 2.61088000  | 1.64735900  | 0.36004000  |
| C | 1.22426300  | 1.48626000  | 0.29754600  |
| C | -0.75233700 | -0.08632500 | 0.19997300  |
| C | -1.23154400 | -1.45281000 | 0.43630400  |
| C | -2.62271600 | -1.62984700 | 0.39064000  |
| C | -3.48292500 | -0.53148100 | 0.22010000  |
| C | -2.93295200 | 0.73585000  | 0.07876000  |

|   |             |             |             |
|---|-------------|-------------|-------------|
| H | 3.48929100  | -1.60074500 | -0.22123200 |
| H | 3.03518400  | 2.63173600  | 0.49529900  |
| H | -3.03100500 | -2.61464700 | 0.57417700  |
| H | -3.55430100 | 1.61818800  | 0.01176800  |
| O | -0.39011100 | -2.40055700 | 0.63364800  |
| H | 1.12928300  | -1.78027300 | -0.12975700 |
| O | 0.44412800  | 2.56324800  | 0.43058000  |
| H | -0.48597100 | 2.28059300  | 0.24028500  |
| N | 1.55842300  | -0.84870000 | -0.12340400 |
| N | -1.60248000 | 0.92225900  | 0.02842100  |
| C | -4.94905200 | -0.76350300 | 0.23453400  |
| C | 4.92358400  | 0.71916600  | 0.21188400  |
| O | 5.45961500  | 1.76867600  | 0.48354200  |
| O | -5.46601700 | -1.82675800 | 0.49289500  |
| C | -7.08389100 | 0.20791900  | -0.14558000 |
| C | -7.64534300 | 1.54262400  | -0.58850300 |
| H | -7.45193800 | -0.09248800 | 0.83938000  |
| H | -7.32355000 | -0.59413300 | -0.84754000 |
| H | -7.25164900 | 1.81998000  | -1.56821800 |
| H | -8.73435100 | 1.48372300  | -0.65976500 |
| H | -7.38619400 | 2.32929500  | 0.12394200  |
| C | 7.04079500  | -0.30739200 | -0.12658500 |
| C | 7.57828100  | -1.66274000 | -0.53456700 |
| H | 7.39204000  | -0.00052300 | 0.86225500  |
| H | 7.31656000  | 0.47705600  | -0.83512200 |
| H | 7.20340900  | -1.94622200 | -1.51993500 |
| H | 8.66980200  | -1.63217500 | -0.57871100 |
| H | 7.28186100  | -2.43076100 | 0.18370700  |
| O | 5.59520700  | -0.41213000 | -0.09308400 |
| O | -5.64360600 | 0.35045600  | -0.07988800 |

The geometric structure coordinates of T2\* under  $E_z = +3 \times 10^{-3}$  a.u.

|   |             |             |             |
|---|-------------|-------------|-------------|
| C | 0.75265400  | 0.09325400  | 0.18976500  |
| C | 2.93325000  | -0.73476900 | 0.07135000  |
| C | 3.48520900  | 0.53025700  | 0.22179600  |
| C | 2.62666700  | 1.63007300  | 0.39412100  |
| C | 1.23645000  | 1.45702900  | 0.43288800  |
| C | -0.67332400 | -0.19181500 | 0.08163200  |
| C | -1.22188400 | -1.47869400 | 0.28878200  |
| C | -2.60671200 | -1.64135500 | 0.35674000  |
| C | -3.45182800 | -0.52305700 | 0.17654600  |
| C | -2.89879900 | 0.71735500  | -0.06885100 |
| H | 3.55225000  | -1.61852400 | 0.00130700  |
| H | 3.03708100  | 2.61272400  | 0.58372500  |
| H | -3.02859000 | -2.62565400 | 0.49992800  |
| H | -3.49416400 | 1.60023800  | -0.24410000 |
| O | -0.43985700 | -2.55386100 | 0.42525800  |
| H | 0.48950900  | -2.27088700 | 0.23187400  |
| O | 0.39513100  | 2.40622200  | 0.62870700  |
| H | -1.14466500 | 1.78459400  | -0.18683400 |
| N | 1.60392800  | -0.91528000 | 0.01614400  |
| N | -1.56122200 | 0.85256900  | -0.14310700 |
| C | -4.92255400 | -0.71818900 | 0.21470300  |
| C | 4.95134800  | 0.75953900  | 0.24322500  |
| O | 5.46959500  | 1.82035600  | 0.50944300  |
| O | -5.45524500 | -1.76779300 | 0.49240600  |
| C | -7.04355500 | 0.30309100  | -0.11584500 |
| C | -7.58611600 | 1.65735200  | -0.52075400 |
| H | -7.38882700 | -0.00456600 | 0.87483400  |
| H | -7.32159800 | -0.48185200 | -0.82296100 |

|   |             |             |             |
|---|-------------|-------------|-------------|
| H | -7.21729400 | 1.94176500  | -1.50814000 |
| H | -8.67780000 | 1.62454400  | -0.55887700 |
| H | -7.28731700 | 2.42587400  | 0.19599900  |
| C | 7.08585900  | -0.21379100 | -0.13370200 |
| C | 7.64635300  | -1.54604600 | -0.58518900 |
| H | 7.45083400  | 0.07793300  | 0.85502600  |
| H | 7.32986400  | 0.59336300  | -0.82827600 |
| H | 7.25591300  | -1.81462800 | -1.56864400 |
| H | 8.73576000  | -1.48887600 | -0.65171300 |
| H | 7.38275100  | -2.33793000 | 0.11979900  |
| O | 5.64517300  | -0.35401100 | -0.07458800 |
| O | -5.59809400 | 0.41088200  | -0.09021600 |

The geometric structure coordinates of T3\* in under  $E_Z = +3 \times 10^{-3}$  a.u.

|   |             |             |            |
|---|-------------|-------------|------------|
| C | 0.68786800  | 0.16468200  | 0.18998500 |
| C | 2.92682100  | -0.70735100 | 0.11364100 |
| C | 3.47610800  | 0.57494400  | 0.15598000 |
| C | 2.62404100  | 1.68280800  | 0.22354000 |
| C | 1.20834400  | 1.53757800  | 0.23554000 |
| C | -0.68782900 | -0.16467300 | 0.18994800 |
| C | -1.20829400 | -1.53759900 | 0.23505800 |
| C | -2.62398900 | -1.68283700 | 0.22306500 |
| C | -3.47607200 | -0.57495700 | 0.15595400 |
| C | -2.92679800 | 0.70735900  | 0.11411300 |
| H | 3.53132100  | -1.59987800 | 0.05392200 |
| H | 3.03573100  | 2.68284200  | 0.25453000 |
| H | -3.03566800 | -2.68288700 | 0.25366500 |
| H | -3.53131200 | 1.59990600  | 0.05484100 |
| O | -0.42047500 | -2.52647400 | 0.29237000 |
| H | 1.14631300  | -1.80743200 | 0.14729700 |



|   |             |             |             |
|---|-------------|-------------|-------------|
| O | 0.42053000  | 2.52644300  | 0.29319600  |
| H | -1.14624600 | 1.80744900  | 0.14800600  |
| N | 1.59913200  | -0.87118200 | 0.14129700  |
| N | -1.59910300 | 0.87120700  | 0.14177100  |
| C | -4.94389900 | -0.78152300 | 0.12820700  |
| C | 4.94392500  | 0.78149300  | 0.12823900  |
| O | 5.47980000  | 1.85944500  | 0.24535600  |
| O | -5.47975500 | -1.85951600 | 0.24499700  |
| C | -7.05994400 | 0.26846500  | -0.14580500 |
| C | -7.59934600 | 1.65960800  | -0.40367300 |
| H | -7.44272200 | -0.16067100 | 0.78420200  |
| H | -7.30203200 | -0.42477700 | -0.95469000 |
| H | -7.19336900 | 2.06486800  | -1.33261700 |
| H | -8.68822100 | 1.62638100  | -0.49105300 |
| H | -7.33766600 | 2.33593100  | 0.41363000  |
| C | 7.05990400  | -0.26851000 | -0.14620500 |
| C | 7.59922500  | -1.65962900 | -0.40436600 |
| H | 7.44274700  | 0.16043800  | 0.78386000  |
| H | 7.30197000  | 0.42487400  | -0.95497600 |
| H | 7.19314400  | -2.06471300 | -1.33334200 |
| H | 8.68809100  | -1.62642300 | -0.49184800 |
| H | 7.33760100  | -2.33608600 | 0.41284300  |
| O | 5.61832600  | -0.37897000 | -0.04745900 |
| O | -5.61836500 | 0.37896100  | -0.04711700 |
